# Supplementary material for: Understanding the gelation properties of the fluorophenyl glycosides of arabinoside gelators: experimental and theoretical studies
Source: Royal Society of Chemistry journal article supplement (doi:10.1039/d4sm00521j), 2024-01-01
Supplement: d4sm00521j1.pdf [file d4sm00521j1.pdf]

## **Understanding the gelation properties of fluorophenyl glycosides of arabinoside gelators: Experimental and theoretical studies**

*Sachchida N. Pandey, Navendu P. Pathak, Arunava Sengupta, \* Somnath Yadav\**

*Department of Chemistry and Chemical Biology, Indian Institute of Technology (ISM)*

*Dhanbad, 826004, Jharkhand, India*

## Table of Contents

|                                                      |         |
|------------------------------------------------------|---------|
| 1. Synthesis of the fluorogelators 3a-e.....         | S3-S5   |
| 2. Gelation studies of 3a-e in various solvents..... | S6-S7   |
| 3. WXR D Data.....                                   | S8-S9   |
| 4. DFT results .....                                 | S10-S44 |
| 5. NMR Spectra.....                                  | S45-S54 |

## 1. Synthesis of the fluorogelators 3a-e

### 1.1 General Procedures

All chemicals, solvents and reagents were procured from commercial source and were used as received. Column chromatography was performed by using silica gel (230-400 mesh) under medium pressure. TLC was performed on precoated aluminium plates of silica gel 60-F<sub>254</sub>. TLC spot were visualized by staining with vanillin solution and subsequent heating on a hot plate. <sup>1</sup>H and <sup>13</sup>C NMR spectra are recorded on Bruker AC-400 NMR spectrometer at 400 MHz (<sup>1</sup>H) and 100 MHz (<sup>13</sup>C) in solution of CDCl<sub>3</sub> or d<sub>6</sub>-DMSO using the peaks of the residual non-deuterated solvent as internal standard.  $\delta$  Values are reported in parts per million (ppm) and coupling constant (*J*) in Hertz. HRMS spectra are recorded on Waters Xevo G2-XS QT Mass Spectrometer and Optical rotation recorded by Anton Paar MCP 5100 Polarimeter.

### 1.2 General procedure for synthesis of fully de-protected phenolic glycosides

D-Arabinose (3.0 g, 19.9 mmol) was stirred in a solution of acetic anhydride (9.4 mL, 99.4 mmol) and pyridine (32.0 mL, 396.4 mmol) at room temperature for 12 hours. After completion of the reaction, 20 mL of H<sub>2</sub>O was added to quench the reaction following which it was extracted with ethyl acetate (60 mL x 3) three times. The combined ethyl acetate extract was then washed with brine solution and dried over anhydrous sodium sulphate (Na<sub>2</sub>SO<sub>4</sub>) and evaporated it *in vacuo* to yield a syrupy residue of 1,2,3,4-tetra-*O*-acetyl-D-arabinopyranoside **2** (5.95 g, 94%) which was used further without purification.

Subsequently, the 1,2,3,4-tetra-*O*-acetyl-D-arabinopyranose **2** (5.95 g, 18.69 mmol) was dissolved in acetic acid (104 mL) followed by the dropwise addition of phosphorus tribromide (17.75 mL, 186.88 mmol) under nitrogen atmosphere. The solution was stirred at room temperature for 4 hours after which the reaction mixture was poured into ice/water (200 mL), and the aqueous phase was extracted thrice with dichloromethane (DCM, 80 mL each). The combined extract was then washed with brine and then dried over anhydrous Na<sub>2</sub>SO<sub>4</sub>. Concentration of the extract *in vacuo* to yield a colourless solid of 2,3,4- tri-*O*-acetyl-1-bromo- $\beta$ -D-arabinopyranoside (5.42 g, 85%).

Subsequently, the 2,3,4-tri-*O*-acetyl-1-bromo- $\alpha$ -D-arabinopyranoside (5.42 g, 15.98 mmol) was dissolved in anhydrous DMF (30 mL) and fluoro-phenol derivatives (2.10 mL, 23.97 mmol, 1.5 equiv.) followed by Sodium hydride ( 0.95 g, 39.95 mmol, 2.5 equiv.) was added to the reaction mixture. The progress of the reaction was monitored by TLC. After 2 h, when the reaction was completed, the mixture was quenched with ethyl acetate. Then the reaction mixture was extracted thrice with ethyl acetate (40 mL x 3). The combined organic

extract was then dried over anhydrous Na<sub>2</sub>SO<sub>4</sub>, filtered, and concentrated *in vacuo* to yield the crude product. The crude product was purified by column chromatography (20% EA/PE) to afford 2,3,4-tri-*O*-acetyl-1-fluoro-phenoxy-β-D-arabinopyranoside (3.03 g, 54%, over two steps from **2**).

Further, the 2,3,4-tri-*O*-acetyl-1-fluoro-phenoxy-β-D-arabinopyranoside (3.03 g, 8.60 mmol) was dissolved in methanol (20 mL) followed by Sodium methoxide (NaOMe, 0.139 g, 2.57 mmol, 0.3 equiv.) was added to the reaction mixture. The progress of the reaction was monitored by TLC. After 1 h, when the reaction was completed, the mixture was neutralized with amberlite IR 120 H<sup>+</sup> resin. Then the reaction mixture was filtered and concentrated *in vacuo* to yield the crude product. The crude product was purified by column chromatography (5-10% MeOH/CHCl<sub>3</sub>) to afford white solid fluoro-phenoxy-β-D-arabinopyranoside **3**.

### 1.3. Characterization data for compounds

**1.3.1. 1-(2-fluorophenoxy)-β-D-arabinopyranosides (3a):** It was synthesized following the general procedure and elution of the column with 9% methanol (MeOH) in Chloroform (CHCl<sub>3</sub>) to afford **3a** (0.252 g, 66%) from compound **2** (over three steps) as a white solid. m.p. 127–129 °C [ $\alpha$ ]<sub>D</sub><sup>25</sup> = -9.747 (*c* = 0.266 in MeOH); <sup>1</sup>H NMR (400 MHz, d<sub>6</sub>-DMSO):  $\delta$  (ppm) 7.25–7.19 (m, 2H), 7.13–7.09 (m, 1H), 7.03–6.98 (m, 1H), 5.31 (d, *J* = 5.3 Hz, 1H), 4.93 (d, *J* = 6.7 Hz, 1H), 4.89 (d, *J* = 5.6 Hz, 1H), 4.72 (d, *J* = 4.2 Hz, 1H), 3.75–3.69 (m, 2H), 3.67–3.62 (m, 1H), 3.59–3.56 (m, 1H), 3.49–3.45 (m, 1H). <sup>13</sup>C{<sup>1</sup>H} NMR (100 MHz, d<sub>6</sub>-DMSO):  $\delta$  (ppm) 153.5, 151.1, 144.7 (d, *J* = 10.4 Hz), 124.8 (d, *J* = 3.6 Hz), 122.6 (d, *J* = 6.9 Hz), 118.0, 116.3 (d, *J* = 18.2 Hz), 101.2, 72.5, 70.3, 67.4, 65.6. HRMS calcd. for C<sub>11</sub>H<sub>13</sub>FO<sub>5</sub>Na<sup>+</sup> (M + Na)<sup>+</sup> 267.0639; found 267.0637.

**1.3.2. 1-(3-fluorophenoxy)-β-D-arabinopyranosides (3b):** It was synthesized following the general procedure and elution of the column with 9% methanol (MeOH) in Chloroform (CHCl<sub>3</sub>) to afford **3b** (0.231 g; 60%) from compound **2** (over three steps) as a white solid. m.p. 139–141 °C [ $\alpha$ ]<sub>D</sub><sup>25</sup> = -1.80 (*c* = 0.166 in MeOH); <sup>1</sup>H NMR (400 MHz, d<sub>6</sub>-DMSO):  $\delta$  (ppm) 7.35–7.29 (m, 1H), 6.87–6.79 (m, 3H), 5.27 (d, *J* = 5.1 Hz, 1H), 4.90 (d, *J* = 5.3 Hz, 1H), 4.88 (d, *J* = 6.8 Hz, 1H), 4.70 (d, *J* = 4 Hz, 1H), 3.74–3.68 (m, 2H), 3.64–3.56 (m, 2H), 3.47–3.43 (m, 1H). <sup>13</sup>C{<sup>1</sup>H} NMR (100 MHz, d<sub>6</sub>-DMSO):  $\delta$  (ppm) 164.0, 161.6, 158.6 (d, *J* = 11.0 Hz), 130.7 (d, *J* = 10.1 Hz), 112.5 (d, *J* = 2.5 Hz), 108.5, 108.3, 103.8, 103.6, 100.6, 72.5, 70.2, 67.6, 65.9. HRMS calcd. for C<sub>11</sub>H<sub>13</sub>FO<sub>5</sub>Na<sup>+</sup> (M + Na)<sup>+</sup> 267.0639; found 267.0634.

**1.3.3. 1-(4-fluorophenoxy)- $\beta$ -D-arabinopyranosides (3c):** It was synthesized following the general procedure and elution of the column with 9% methanol (MeOH) in Chloroform (CHCl<sub>3</sub>) to afford **3c** (0.283 g; 74%) from compound **2** (over three steps) as a white solid. m.p. 152–154 °C [ $\alpha$ ]<sub>D</sub><sup>25</sup> = –50.555 (*c* = 0.233 in MeOH); <sup>1</sup>H NMR (400 MHz, d<sub>6</sub>-DMSO):  $\delta$  (ppm) 7.15–7.09 (m, 2H), 7.04–6.99 (m, 2H), 5.25 (d, *J* = 5 Hz, 1H), 4.88 (d, *J* = 5.6 Hz, 1H), 4.77 (d, *J* = 6.9 Hz, 1H), 4.68 (d, *J* = 4.1 Hz, 1H), 3.74–3.68 (m, 2H), 3.60–3.55 (m, 2H), 3.46–3.42 (m, 1H). <sup>13</sup>C{<sup>1</sup>H} NMR (100 MHz, d<sub>6</sub>-DMSO):  $\delta$  (ppm) 158.4, 156.1, 153.6 (d, *J* = 1.9 Hz), 118.0 (d, *J* = 8.1 Hz), 116.0, 115.73, 101.48, 72.52, 70.34, 67.67, 65.79. HRMS calcd. for C<sub>11</sub>H<sub>13</sub>FO<sub>5</sub>H<sup>+</sup> (M + H)<sup>+</sup> 245.0820; found 245.0848.

**61.3.4. 1-(2,3-difluorophenoxy)- $\beta$ -D-arabinopyranosides (3d):** It was synthesized following the general procedure and elution of the column with 9% methanol (MeOH) in Chloroform (CHCl<sub>3</sub>) to afford **3d** (0.280 g; 71%) from compound **2** (over three steps) as a white solid. m.p. 140–142 °C [ $\alpha$ ]<sub>D</sub><sup>25</sup> = +6.666 (*c* = 0.333 in MeOH); <sup>1</sup>H NMR (400 MHz, d<sub>6</sub>-DMSO):  $\delta$  (ppm) 7.14–7.01 (m, 3H), 5.36 (d, *J* = 5.2 Hz, 1H), 4.96 (d, *J* = 6.4 Hz, 1H), 4.88 (d, *J* = 5.6 Hz, 1H), 4.73 (d, *J* = 4.0 Hz, 1H), 3.75–3.71 (m, 2H), 3.67–3.58 (m, 3H). <sup>13</sup>C{<sup>1</sup>H} NMR (100 MHz, d<sub>6</sub>-DMSO):  $\delta$  (ppm) 151.9 (d, *J* = 10.2 Hz), 149.5 (d, *J* = 10.5 Hz), 146.4 (dd, *J*<sub>1</sub> = 7.5 Hz, *J*<sub>2</sub> = 2.5 Hz), 142.2 (d, *J* = 14.1 Hz), 139.7 (d, *J* = 14.4 Hz), 124.2 (dd, *J*<sub>1</sub> = 8.6 Hz, *J*<sub>2</sub> = 5.0 Hz), 113.4 (d, *J* = 2.6 Hz), 110.3 (d, *J* = 17.0 Hz), 101.4, 72.5, 70.3, 67.4, 65.7. HRMS calcd. for C<sub>11</sub>H<sub>12</sub>F<sub>2</sub>O<sub>5</sub>Na<sup>+</sup> (M + Na)<sup>+</sup> 285.0545; found 285.0543.

**1.3.5. 1-(3,4-difluorophenoxy)- $\beta$ -D-arabinopyranosides (3e):** It was synthesized following the general procedure and elution of the column with 9% methanol (MeOH) in Chloroform (CHCl<sub>3</sub>) to afford **3e** (0.271 g; 64%) from compound **2** (over three steps) as a white solid. m.p. 135–137 °C [ $\alpha$ ]<sub>D</sub><sup>25</sup> = +6.313 (*c* = 0.333 in MeOH); <sup>1</sup>H NMR (400 MHz, d<sub>6</sub>-DMSO):  $\delta$  (ppm) 7.33 (dd, *J* = 19.6 and 9.2 Hz, 1H), 7.11–7.05 (m, 1H), 6.84–6.82 (m, 1H), 5.28 (d, *J* = 4.8 Hz, 1H), 4.86–4.81 (m, 2H), 4.68 (d, *J* = 3.6 Hz, 1H), 3.73–3.69 (m, 2H), 3.61–3.55 (m, 3H). <sup>13</sup>C{<sup>1</sup>H} NMR (100 MHz, d<sub>6</sub>-DMSO):  $\delta$  (ppm) 153.9 (dd, *J*<sub>1</sub> = 8.8 Hz, *J*<sub>2</sub> = 2.0 Hz), 150.8 (d, *J* = 13.8 Hz), 148.4 (d, *J* = 13.8 Hz), 146.1 (d, *J* = 12.6 Hz), 143. (d, *J* = 12.6 Hz), 117.7 (d, *J* = 18.3 Hz), 112.9 (dd, *J*<sub>1</sub> = 5.8 Hz, *J*<sub>2</sub> = 3.3 Hz), 106.2, 106.0, 101.3, 72.6, 70.3, 67.7, 65.9. HRMS calcd. for C<sub>11</sub>H<sub>12</sub>F<sub>2</sub>O<sub>5</sub>Na<sup>+</sup> (M + Na)<sup>+</sup> 285.0545; found 285.0543.

## 2. Gelation studies of 3a-e in various solvents

**Table S1** Gelation studies of **3a**, **3b**, **3c**, **3d**, and **3e** in various solvents.<sup>a</sup>

| Solvent                 | (MGC, <sup>b</sup> T <sub>g</sub> <sup>c</sup> ) |                     |                     |                   |                     |
|-------------------------|--------------------------------------------------|---------------------|---------------------|-------------------|---------------------|
|                         | 3a                                               | 3b                  | 3c                  | 3d                | 3e                  |
| Benzene                 | G, (0.5%, 42-43 °C)                              | G, (0.6%, 47-48 °C) | G, (0.6%, 40-41 °C) | G, (1%, 60-70 °C) | G, (0.5%, 60-70 °C) |
| Toluene                 | G, (0.6%, 51-52 °C)                              | G, (0.7%, 54-55 °C) | G, (0.7%, 53-54 °C) | G, (1%, 60-70 °C) | G, (0.5%, 60-70 °C) |
| <i>o</i> -xylene        | G, (0.7%, 56-57 °C)                              | G, (0.7%, 55-56 °C) | G, (0.7%, 57-58 °C) | G, (1%, 60-70 °C) | G, (0.5%, 60-70 °C) |
| <i>m</i> -xylene        | G, (0.7%, 58-59 °C)                              | G, (0.7%, 58-59 °C) | G, (0.8%, 59-60 °C) | G, (1%, 60-70 °C) | G, (0.5%, 60-70 °C) |
| <i>p</i> -xylene        | G, (0.6%, 57-58 °C)                              | G, (0.8%, 55-56 °C) | G, (0.7%, 55-56 °C) | G, (1%, 60-70 °C) | G, (0.5%, 60-70 °C) |
| Chlorobenzene           | G, (0.7%, 53-54 °C)                              | G, (0.7%, 56-57 °C) | G, (0.8%, 57-58 °C) | G, (1%, 60-70 °C) | G, (0.5%, 60-70 °C) |
| Hexane                  | PS                                               | PS                  | PS                  | PS                | PS                  |
| DCM                     | PS                                               | PS                  | PS                  | PS                | PS                  |
| Chloroform              | PS                                               | PS                  | PS                  | PS                | PS                  |
| Ethyl acetate           | PS                                               | PS                  | PS                  | PS                | PS                  |
| Aceto nitrile           | S                                                | S                   | S                   | S                 | S                   |
| Ethanol                 | S                                                | S                   | S                   | S                 | S                   |
| Methanol                | S                                                | S                   | S                   | S                 | S                   |
| <i>n</i> -butyl alcohol | S                                                | S                   | S                   | S                 | S                   |
| Amyl alcohol            | S                                                | S                   | S                   | S                 | S                   |
| Water                   | S                                                | S                   | S                   | S                 | S                   |
| DMF                     | S                                                | S                   | S                   | S                 | S                   |
| DMSO                    | S                                                | S                   | S                   | S                 | S                   |

<sup>a</sup>G = Gel; S = Solution; PS = Partial soluble; <sup>b</sup>MGC = Minimum Gelation Concentration % (w/v). <sup>c</sup>Tg= Gelation temperature.

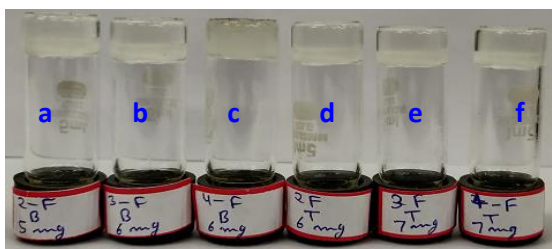

**Fig. S1** Gels of **1-3** in Benzene (a) 0.5% w/v (b) 0.6% w/v (c) 0.6% w/v, and **1-3** in toluene (d) 0.6% w/v (e) 0.7% w/v (f) 0.7% w/v respectively.

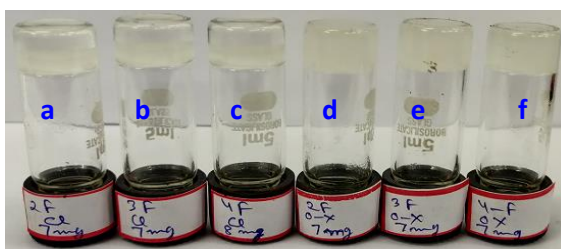

**Fig. S2** Gels of **1-3** in Chlorobenzene (a) 0.7% w/v (b) 0.7% w/v (c) 0.8% w/v, and **1-3** in *o*-xylene (d) 0.7% w/v (e) 0.7% w/v (f) 0.7% w/v respectively.

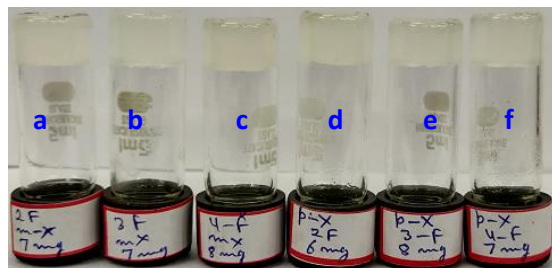

**Fig. S3** Gels of **1-3** in *m*-xylene (a) 0.7% w/v (b) 0.7% w/v (c) 0.8% w/v, and **1-3** in *p*-xylene (d) 0.6% w/v (e) 0.8% w/v (f) 0.7% w/v respectively.

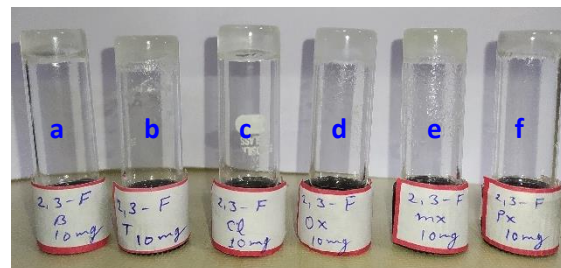

**Fig. S4** Gels of **4** in (a) benzene 1% w/v (b) toluene 1% w/v (c) chlorobenzene 1 % w/v, (d) *o*-xylene 1% w/v (e) *m*-xylene 1% w/v and (f) *p*-xylene 1% w/v respectively.

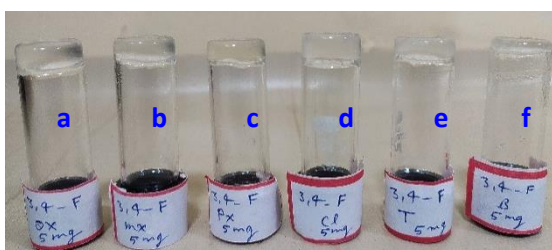

**Fig. S5** Gels of **5** in (a) *o*-xylene 0.5% w/v (b) *m*-xylene 0.5% w/v (c) *p*-xylene 0.5 % w/v, (d) chlorobenzene 0.5 % w/v (e) toluene 0.5 % w/v and (f) benzene 0.5 % w/v respectively.

### 3. WXRD Data

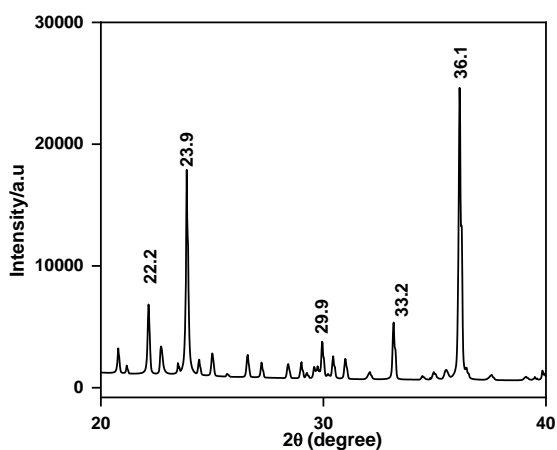

Fig. S6 WXR D diffractogram of 3a.

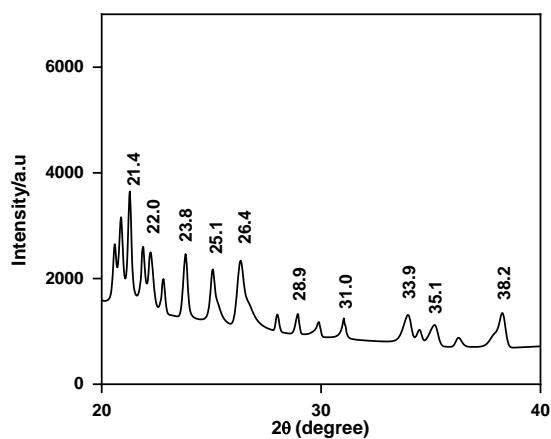

Fig. S7 WXR D diffractogram of 3b.

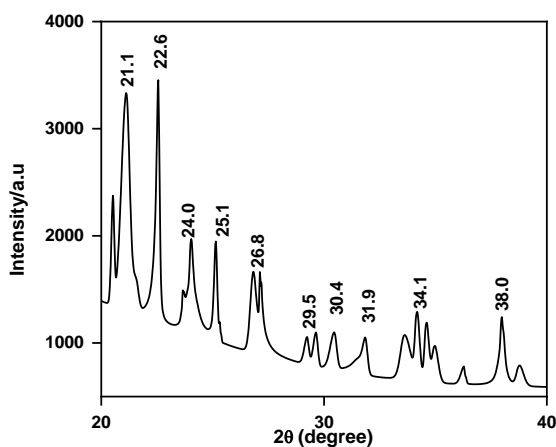

Fig. S8 WXR D diffractogram of 3c.

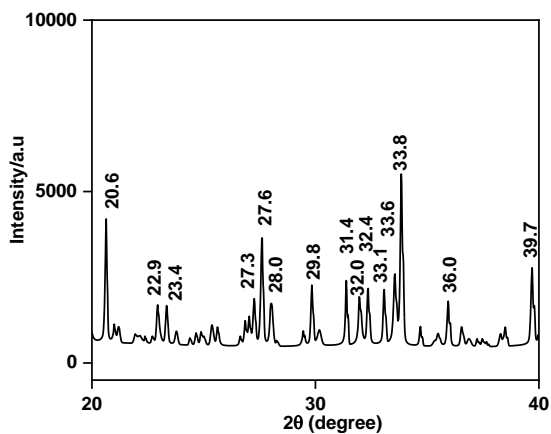

Fig. S9 WXR D diffractogram of 3d.

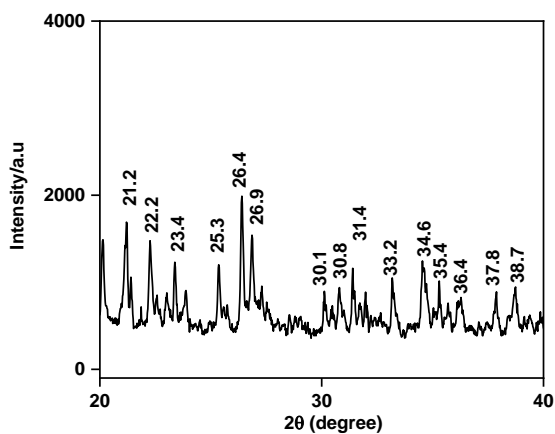

Fig. S10 WXR D diffractogram of 3e.

Table S2 WXR D of compound 3a

| 2θ   | d spacing | 2θ   | d spacing |
|------|-----------|------|-----------|
| 22.2 | 4.0       | 33.2 | 2.7       |
| 23.9 | 3.7       | 36.1 | 2.5       |



|      |     |  |  |
|------|-----|--|--|
| 29.9 | 3.0 |  |  |
|------|-----|--|--|

**Table S3.**WXRd of compound **3b**

| <b>2<math>\theta</math></b> | <b>d spacing</b> | <b>2<math>\theta</math></b> | <b>d spacing</b> |
|-----------------------------|------------------|-----------------------------|------------------|
| 21.4                        | 4.2              | 28.9                        | 3.1              |
| 22.0                        | 4.0              | 31.0                        | 2.9              |
| 23.8                        | 3.7              | 33.9                        | 2.6              |
| 25.1                        | 3.5              | 35.1                        | 2.6              |
| 26.4                        | 3.4              | 38.2                        | 2.4              |

**Table S4.** WXRd of compound **3c**

| <b>2<math>\theta</math></b> | <b>d spacing</b> | <b>2<math>\theta</math></b> | <b>d spacing</b> |
|-----------------------------|------------------|-----------------------------|------------------|
| 21.1                        | 4.2              | 30.4                        | 2.9              |
| 22.6                        | 3.9              | 31.9                        | 2.8              |
| 24.0                        | 3.7              | 38.0                        | 2.4              |
| 25.1                        | 3.5              | 34.1                        | 2.6              |
| 29.5                        | 3.0              | 38.0                        | 2.4              |

**Table S5.** WXRd of compound **3d**

| <b>2<math>\theta</math></b> | <b>d spacing</b> | <b>2<math>\theta</math></b> | <b>d spacing</b> |
|-----------------------------|------------------|-----------------------------|------------------|
| 20.6                        | 4.3              | 32.0                        | 2.8              |
| 22.9                        | 3.9              | 32.4                        | 2.8              |
| 23.4                        | 3.8              | 33.1                        | 2.7              |
| 27.3                        | 3.3              | 33.6                        | 2.7              |
| 27.6                        | 3.2              | 33.8                        | 2.7              |
| 28.0                        | 3.2              | 36.0                        | 2.5              |
| 29.8                        | 3.0              | 39.7                        | 2.3              |
| 31.4                        | 2.8              |                             |                  |

**Table S6** WXRd of compound **3e**

| <b>2<math>\theta</math></b> | <b>d spacing</b> | <b>2<math>\theta</math></b> | <b>d spacing</b> |
|-----------------------------|------------------|-----------------------------|------------------|
| 21.2                        | 4.2              | 31.4                        | 2.8              |
| 22.2                        | 4.0              | 33.2                        | 2.7              |
| 23.4                        | 3.8              | 34.6                        | 2.6              |
| 25.3                        | 3.5              | 35.4                        | 2.5              |
| 26.4                        | 3.4              | 36.4                        | 2.5              |
| 26.9                        | 3.3              | 37.8                        | 2.4              |
| 30.1                        | 3.0              | 38.7                        | 2.3              |
| 30.8                        | 2.9              |                             |                  |

**Table S7** Microstructure of *p*-xylene xerogels of **3a-e**.

| Gelator   | Solvent          | Microstructure               |
|-----------|------------------|------------------------------|
| <b>3a</b> | <i>p</i> -xylene | Sheet like                   |
| <b>3b</b> | <i>p</i> -xylene | Interconnected fiber bundles |
| <b>3c</b> | <i>p</i> -xylene | Interconnected fiber bundles |
| <b>3d</b> | <i>p</i> -xylene | Interconnected fiber bundles |
| <b>3e</b> | <i>p</i> -xylene | Interconnected fiber bundles |

#### 4. DFT results

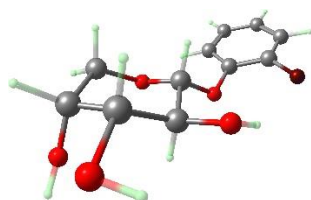**Fig. S11** DFT-optimized geometry of **3a**.**Table S8** DFT-optimized cartesian coordinates of **3a**.

|   |           |          |           |
|---|-----------|----------|-----------|
| C | 9.014385  | 3.204506 | 6.545253  |
| H | 9.920781  | 3.494438 | 7.082162  |
| C | 9.110747  | 2.730689 | 5.233338  |
| H | 10.069361 | 2.635197 | 4.721276  |
| C | 7.953759  | 2.357179 | 4.545264  |
| C | 8.410619  | 2.706569 | 2.247788  |
| H | 8.110004  | 3.753363 | 2.475516  |
| C | 10.322919 | 3.409411 | 1.074191  |
| H | 11.405870 | 3.225015 | 1.048963  |
| H | 10.153138 | 4.485616 | 1.283457  |
| C | 9.718938  | 3.068360 | -0.287628 |
| H | 10.037413 | 3.854465 | -1.005063 |
| C | 8.188436  | 3.082309 | -0.203191 |
| H | 7.841474  | 4.122026 | -0.030482 |
| C | 7.726708  | 2.232992 | 0.971339  |
| H | 8.058072  | 1.190903 | 0.804710  |
| O | 7.970513  | 1.858712 | 3.270953  |
| O | 9.805206  | 2.614172 | 2.129704  |
| O | 10.168388 | 1.798971 | -0.695250 |
| H | 9.559096  | 1.518285 | -1.396939 |
| O | 7.682432  | 2.580787 | -1.423096 |
| H | 6.750667  | 2.360782 | -1.273536 |
| O | 6.324178  | 2.338385 | 1.058590  |
| H | 6.046636  | 1.869460 | 1.860546  |
| C | 6.605942  | 2.928535 | 6.488019  |
| H | 5.618108  | 2.996848 | 6.948312  |
| C | 6.710058  | 2.470768 | 5.179839  |
| C | 7.768499  | 3.298564 | 7.172402  |
| H | 7.695934  | 3.661780 | 8.200104  |
| F | 5.606151  | 2.130164 | 4.494511  |

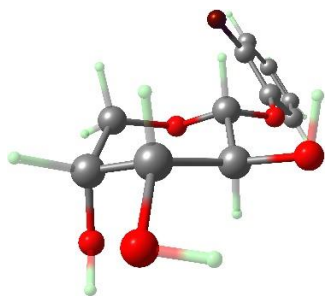

**Fig. S12** DFT-optimized geometry of **3a'**.

**Table S9** DFT-optimized cartesian coordinates of **3a'**.

|   |           |          |           |
|---|-----------|----------|-----------|
| C | 8.707036  | 3.842081 | 6.352755  |
| H | 9.358180  | 4.649994 | 6.693374  |
| C | 8.398526  | 3.778245 | 4.998072  |
| C | 7.576657  | 2.764365 | 4.482164  |
| C | 8.049768  | 3.070836 | 2.149911  |
| H | 8.113052  | 4.180649 | 2.151988  |
| C | 10.275948 | 2.936148 | 1.386509  |
| H | 11.217508 | 2.432173 | 1.644236  |
| H | 10.433618 | 4.032077 | 1.446691  |
| C | 9.866388  | 2.558734 | -0.034726 |
| H | 10.552011 | 3.074497 | -0.740366 |
| C | 8.435866  | 3.039987 | -0.301886 |
| H | 8.436416  | 4.152791 | -0.322049 |
| C | 7.489370  | 2.588222 | 0.814530  |
| H | 7.474620  | 1.488856 | 0.846431  |
| O | 7.208139  | 2.628195 | 3.173646  |
| O | 9.323044  | 2.522816 | 2.348407  |
| O | 9.935105  | 1.162260 | -0.187305 |
| H | 9.412669  | 0.959582 | -0.979853 |
| O | 8.016298  | 2.519523 | -1.543769 |
| H | 7.046145  | 2.542471 | -1.537032 |
| O | 6.167500  | 3.003929 | 0.535258  |
| H | 6.099598  | 3.957932 | 0.687086  |
| C | 7.342800  | 1.891053 | 6.742281  |
| H | 6.920662  | 1.144837 | 7.419337  |
| C | 7.055310  | 1.824162 | 5.379227  |
| C | 8.177587  | 2.898291 | 7.234709  |
| H | 8.416619  | 2.953563 | 8.298910  |
| H | 6.420375  | 1.037639 | 4.966745  |
| F | 8.903409  | 4.727041 | 4.182140  |

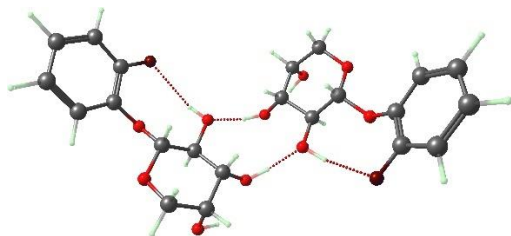

**Fig. S13** DFT-optimized geometry of **3a-H**.

**Table S10** DFT-optimized cartesian coordinates of **3a-H**.

|   |          |           |           |
|---|----------|-----------|-----------|
| C | 7.511023 | -7.158530 | -7.282098 |
| H | 7.112307 | -6.412089 | -7.972893 |
| C | 6.631408 | -7.951140 | -6.538476 |
| H | 5.548235 | -7.852139 | -6.625088 |
| C | 7.138570 | -8.909371 | -5.658364 |
| C | 5.588075 | -9.170542 | -3.885068 |

|   |           |            |           |
|---|-----------|------------|-----------|
| H | 6.142113  | -8.302972  | -3.460720 |
| C | 3.532363  | -8.187466  | -3.364068 |
| H | 2.574765  | -7.935997  | -3.840473 |
| H | 3.994764  | -7.252743  | -2.984606 |
| C | 3.286879  | -9.133296  | -2.192126 |
| H | 2.825480  | -8.540186  | -1.372946 |
| C | 4.601999  | -9.732980  | -1.655558 |
| H | 5.178495  | -8.946470  | -1.134258 |
| C | 5.439309  | -10.250388 | -2.820379 |
| H | 4.909883  | -11.101334 | -3.283408 |
| O | 6.338877  | -9.741523  | -4.924084 |
| O | 4.346564  | -8.760768  | -4.376643 |
| O | 2.436124  | -10.174332 | -2.604584 |
| H | 2.523887  | -10.860078 | -1.921448 |
| O | 4.286688  | -10.784707 | -0.776121 |
| H | 4.722334  | -10.608922 | 0.083173  |
| O | 6.725884  | -10.629482 | -2.354976 |
| H | 7.276598  | -10.817378 | -3.132473 |
| C | 9.408369  | -8.278617  | -6.267602 |
| H | 10.482500 | -8.427376  | -6.139354 |
| C | 8.525309  | -9.053182  | -5.525629 |
| C | 8.893170  | -7.324280  | -7.151387 |
| H | 9.578786  | -6.709375  | -7.738934 |
| F | 8.994995  | -9.964252  | -4.652974 |
| C | 7.645955  | -5.812499  | 5.397168  |
| H | 8.500780  | -5.354041  | 5.899679  |
| C | 7.749498  | -7.120040  | 4.912443  |
| H | 8.662571  | -7.707757  | 5.021429  |
| C | 6.656494  | -7.709146  | 4.273582  |
| C | 7.524408  | -9.272727  | 2.717541  |
| H | 7.670176  | -8.352385  | 2.108603  |
| C | 9.655721  | -10.063228 | 2.163375  |
| H | 10.558914 | -10.456027 | 2.650495  |
| H | 9.930282  | -9.151722  | 1.593016  |
| C | 9.102464  | -11.107436 | 1.198064  |
| H | 9.781258  | -11.142818 | 0.318442  |
| C | 7.695158  | -10.732156 | 0.693609  |
| H | 7.767012  | -9.869174  | 0.006555  |
| C | 6.821407  | -10.332431 | 1.877425  |
| H | 6.671647  | -11.218132 | 2.518831  |
| O | 6.670605  | -8.988892  | 3.794406  |
| O | 8.749060  | -9.733742  | 3.205657  |
| O | 9.044291  | -12.355756 | 1.843381  |
| H | 8.462407  | -12.901746 | 1.288469  |
| O | 7.141668  | -11.846026 | 0.036215  |
| H | 6.902937  | -11.576674 | -0.874460 |
| O | 5.586419  | -9.815393  | 1.405610  |
| H | 5.099527  | -9.465839  | 2.169665  |
| C | 5.356383  | -5.679127  | 4.607053  |
| H | 4.414450  | -5.143710  | 4.471334  |
| C | 5.474336  | -6.974347  | 4.119329  |
| C | 6.454282  | -5.096381  | 5.249485  |
| H | 6.373529  | -4.077681  | 5.635436  |
| F | 4.442167  | -7.553180  | 3.477167  |

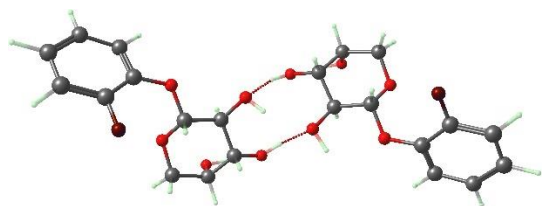

**Fig. S14** DFT-optimized geometry of **3a'-H**.

**Table S11** DFT-optimized cartesian coordinates of **3a'-H**.

|   |           |           |           |
|---|-----------|-----------|-----------|
| C | 7.997639  | 5.719318  | 5.196386  |
| H | 8.450976  | 6.706982  | 5.089256  |
| C | 7.893848  | 4.917262  | 4.065316  |
| C | 7.331389  | 3.635068  | 4.131810  |
| C | 8.154293  | 2.760073  | 2.039443  |
| H | 8.086612  | 3.673319  | 1.414441  |
| C | 10.445842 | 2.625239  | 1.626924  |
| H | 11.392149 | 2.499748  | 2.170181  |
| H | 10.472637 | 3.590632  | 1.083352  |
| C | 10.277020 | 1.481152  | 0.630054  |
| H | 10.978247 | 1.654725  | -0.212821 |
| C | 8.851015  | 1.441036  | 0.050320  |
| H | 8.702256  | 2.324384  | -0.603456 |
| C | 7.849061  | 1.526237  | 1.200499  |
| H | 7.980440  | 0.644022  | 1.849197  |
| O | 7.182312  | 2.796666  | 3.057691  |
| O | 9.419460  | 2.648779  | 2.608042  |
| O | 10.553283 | 0.262932  | 1.278181  |
| H | 10.224600 | -0.432026 | 0.685304  |
| O | 8.726158  | 0.244274  | -0.672164 |
| H | 7.993841  | 0.354197  | -1.317198 |
| O | 6.513256  | 1.579798  | 0.691841  |
| H | 5.942288  | 1.837000  | 1.434341  |
| C | 6.939242  | 3.985657  | 6.503642  |
| H | 6.561686  | 3.611145  | 7.457768  |
| C | 6.858320  | 3.180749  | 5.366648  |
| C | 7.515394  | 5.256483  | 6.422680  |
| H | 7.591579  | 5.889052  | 7.309647  |
| H | 6.432274  | 2.176275  | 5.407084  |
| F | 8.340712  | 5.394362  | 2.887954  |
| C | 3.541919  | 0.902840  | -7.669061 |
| H | 2.553757  | 1.301873  | -7.908043 |
| C | 3.924578  | 0.860143  | -6.332643 |
| C | 5.174903  | 0.352976  | -5.945842 |
| C | 4.760721  | 0.106157  | -3.595709 |
| H | 4.139198  | 1.012267  | -3.444358 |
| C | 2.992362  | -1.262762 | -2.871415 |
| H | 2.423853  | -2.143929 | -3.199701 |
| H | 2.292623  | -0.408533 | -2.767614 |
| C | 3.646764  | -1.552070 | -1.524860 |
| H | 2.854918  | -1.560016 | -0.745940 |
| C | 4.647919  | -0.445519 | -1.165223 |
| H | 4.074813  | 0.487482  | -0.964055 |
| C | 5.590947  | -0.169564 | -2.341448 |
| H | 6.183462  | -1.075206 | -2.541897 |
| O | 5.642374  | 0.285023  | -4.666219 |
| O | 3.947116  | -0.998539 | -3.879148 |
| O | 4.310159  | -2.790657 | -1.587759 |

|   |          |           |           |
|---|----------|-----------|-----------|
| H | 4.914810 | -2.807540 | -0.829012 |
| O | 5.337257 | -0.873680 | -0.015103 |
| H | 5.922799 | -0.151605 | 0.277227  |
| O | 6.494630 | 0.894727  | -2.067490 |
| H | 6.162661 | 1.438927  | -1.333659 |
| C | 5.673423 | -0.037508 | -8.296487 |
| H | 6.369413 | -0.391508 | -9.060535 |
| C | 6.040311 | -0.093434 | -6.952240 |
| C | 4.417373 | 0.455826  | -8.660711 |
| H | 4.117254 | 0.495546  | -9.710047 |
| H | 7.008463 | -0.489335 | -6.639304 |
| F | 3.064098 | 1.329178  | -5.405345 |

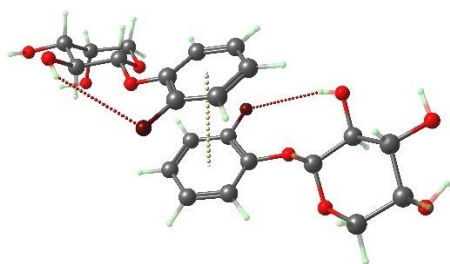

**Fig. S15** DFT-optimized geometry of **3a- $\pi$** .

**Table S12** DFT-optimized cartesian coordinates of **3a- $\pi$** .

|   |           |            |           |
|---|-----------|------------|-----------|
| C | 2.140912  | -9.134582  | 3.997728  |
| H | 1.505376  | -8.977298  | 3.123299  |
| C | 1.778425  | -8.559045  | 5.220435  |
| H | 0.857434  | -7.985566  | 5.325698  |
| C | 2.594603  | -8.741480  | 6.339495  |
| C | 1.705658  | -6.979672  | 7.678840  |
| H | 2.066882  | -6.306677  | 6.871253  |
| C | -0.392672 | -5.920033  | 7.724577  |
| H | -1.461053 | -6.171080  | 7.673343  |
| H | -0.150079 | -5.237216  | 6.884158  |
| C | -0.104496 | -5.202069  | 9.042380  |
| H | -0.539871 | -4.182459  | 8.973548  |
| C | 1.409127  | -5.069605  | 9.250578  |
| H | 1.821001  | -4.366701  | 8.496942  |
| C | 2.074054  | -6.422244  | 9.050980  |
| H | 1.663863  | -7.128661  | 9.795920  |
| O | 2.342523  | -8.215057  | 7.576481  |
| O | 0.313830  | -7.142479  | 7.585382  |
| O | -0.674322 | -5.925398  | 10.105507 |
| H | -0.237875 | -5.598982  | 10.908665 |
| O | 1.624745  | -4.582692  | 10.559172 |
| H | 2.553548  | -4.753261  | 10.775795 |
| O | 3.466800  | -6.252488  | 9.205285  |
| H | 3.881975  | -7.103200  | 8.993899  |
| C | 4.109713  | -10.107704 | 5.014471  |
| H | 5.044522  | -10.666215 | 4.949103  |
| C | 3.756955  | -9.514784  | 6.217299  |
| C | 3.296872  | -9.909354  | 3.893850  |
| H | 3.585015  | -10.350368 | 2.937831  |
| F | 4.553868  | -9.639755  | 7.291817  |
| C | 6.040510  | -6.832155  | 6.574350  |
| H | 6.505402  | -6.870701  | 7.562125  |
| C | 6.499401  | -7.690879  | 5.570084  |

|   |          |            |           |
|---|----------|------------|-----------|
| H | 7.279541 | -8.421253  | 5.779893  |
| C | 5.901527 | -7.663181  | 4.308771  |
| C | 7.456772 | -9.143162  | 3.261212  |
| H | 8.268197 | -8.459830  | 3.596945  |
| C | 8.567753 | -11.037581 | 4.124932  |
| H | 8.368821 | -11.895160 | 4.781849  |
| H | 9.405068 | -10.450672 | 4.553656  |
| C | 8.969204 | -11.538476 | 2.739612  |
| H | 9.990341 | -11.967760 | 2.817833  |
| C | 9.008388 | -10.369794 | 1.748730  |
| H | 9.835656 | -9.683255  | 2.023643  |
| C | 7.702556 | -9.591971  | 1.824084  |
| H | 6.874093 | -10.275767 | 1.562219  |
| O | 6.238893 | -8.468204  | 3.259242  |
| O | 7.378605 | -10.259610 | 4.113335  |
| O | 8.043268 | -12.505061 | 2.306312  |
| H | 8.182898 | -12.592456 | 1.349777  |
| O | 9.205827 | -10.903631 | 0.457045  |
| H | 8.976565 | -10.205240 | -0.174516 |
| O | 7.793768 | -8.505046  | 0.932658  |
| H | 6.954198 | -8.024269  | 0.975225  |
| C | 4.381339 | -5.925957  | 5.070502  |
| H | 3.551288 | -5.255104  | 4.839831  |
| C | 4.841335 | -6.774766  | 4.075864  |
| C | 4.986839 | -5.951158  | 6.332549  |
| H | 4.619008 | -5.309010  | 7.133230  |
| F | 4.270431 | -6.769582  | 2.863386  |

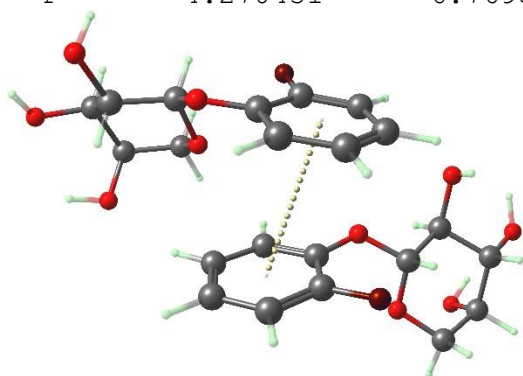

**Fig. S16** DFT-optimized geometry of **3a'- $\pi$** .

**Table S13** DFT-optimized cartesian coordinates of **3a'- $\pi$** .

|   |           |           |           |
|---|-----------|-----------|-----------|
| C | 11.804412 | -4.518319 | 3.723941  |
| H | 11.946613 | -4.910600 | 4.733305  |
| C | 10.847368 | -5.118672 | 2.915782  |
| C | 10.606634 | -4.669649 | 1.610713  |
| C | 8.514894  | -5.761674 | 1.159793  |
| H | 8.671411  | -6.581862 | 1.890624  |
| C | 6.509346  | -5.133993 | 2.241669  |
| H | 6.035885  | -4.237799 | 2.666285  |
| H | 6.621021  | -5.888360 | 3.047846  |
| C | 5.623071  | -5.708275 | 1.139304  |
| H | 4.730857  | -6.166682 | 1.617090  |
| C | 6.388827  | -6.800012 | 0.386334  |
| H | 6.544724  | -7.659030 | 1.076763  |
| C | 7.764990  | -6.298080 | -0.058225 |
| H | 7.635525  | -5.460552 | -0.758902 |
| O | 9.729497  | -5.237817 | 0.726910  |

|   |           |           |           |
|---|-----------|-----------|-----------|
| O | 7.776094  | -4.729421 | 1.760431  |
| O | 5.254109  | -4.685279 | 0.247670  |
| H | 4.942611  | -5.135976 | -0.553352 |
| O | 5.619386  | -7.191228 | -0.729786 |
| H | 6.231195  | -7.615051 | -1.351991 |
| O | 8.443626  | -7.321113 | -0.767864 |
| H | 8.715369  | -8.004058 | -0.137696 |
| C | 12.363306 | -3.013267 | 1.918203  |
| H | 12.967852 | -2.208263 | 1.495867  |
| C | 11.378002 | -3.609239 | 1.131874  |
| C | 12.572291 | -3.462859 | 3.224322  |
| H | 13.335160 | -3.001376 | 3.855565  |
| H | 11.197251 | -3.285711 | 0.107450  |
| F | 10.168789 | -6.182118 | 3.404993  |
| C | 11.779578 | -7.238680 | -0.646918 |
| H | 11.054689 | -7.420370 | -1.441366 |
| C | 12.834935 | -6.370249 | -0.896466 |
| C | 13.756167 | -6.033668 | 0.106986  |
| C | 14.820298 | -4.165342 | -0.988964 |
| H | 14.935780 | -4.585046 | -2.013667 |
| C | 13.498430 | -2.375950 | -1.799397 |
| H | 12.507234 | -1.933182 | -1.627575 |
| H | 13.546462 | -2.728480 | -2.849289 |
| C | 14.581621 | -1.331426 | -1.557624 |
| H | 14.537439 | -0.580048 | -2.373337 |
| C | 15.951444 | -2.014332 | -1.590240 |
| H | 16.140140 | -2.367567 | -2.628691 |
| C | 15.984286 | -3.229804 | -0.659624 |
| H | 15.829086 | -2.887212 | 0.373955  |
| O | 14.817609 | -5.185155 | -0.036744 |
| O | 13.613580 | -3.460903 | -0.902578 |
| O | 14.372003 | -0.726892 | -0.302081 |
| H | 15.212297 | -0.300629 | -0.068675 |
| O | 16.925714 | -1.073450 | -1.197220 |
| H | 17.703284 | -1.582260 | -0.917597 |
| O | 17.261280 | -3.835227 | -0.692174 |
| H | 17.362023 | -4.309750 | -1.530319 |
| C | 12.572370 | -7.523852 | 1.617170  |
| H | 12.468557 | -7.964432 | 2.610623  |
| C | 13.607704 | -6.625265 | 1.365692  |
| C | 11.651911 | -7.826589 | 0.612040  |
| H | 10.828911 | -8.516654 | 0.812810  |
| H | 14.320304 | -6.341904 | 2.141586  |
| F | 12.964053 | -5.850879 | -2.135039 |

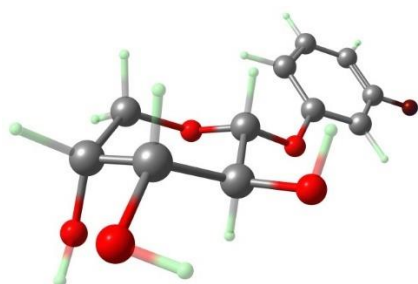

**Fig. S17** DFT-optimized geometry of **3b**.

**Table S14** DFT-optimized cartesian coordinates of **3b'**.

|   |          |          |          |
|---|----------|----------|----------|
| C | 8.802433 | 3.689131 | 6.348125 |
|---|----------|----------|----------|



|   |           |          |           |
|---|-----------|----------|-----------|
| H | 9.585444  | 4.363340 | 6.704071  |
| C | 8.777164  | 3.328604 | 4.997140  |
| H | 9.549751  | 3.681422 | 4.316372  |
| C | 7.774928  | 2.459284 | 4.544056  |
| C | 8.268479  | 2.764693 | 2.231617  |
| H | 8.147247  | 3.861172 | 2.411355  |
| C | 10.371654 | 3.097446 | 1.186386  |
| H | 11.403271 | 2.727330 | 1.263770  |
| H | 10.377878 | 4.193775 | 1.359046  |
| C | 9.831772  | 2.818954 | -0.213169 |
| H | 10.338038 | 3.511081 | -0.919447 |
| C | 8.326893  | 3.101393 | -0.243615 |
| H | 8.169540  | 4.195722 | -0.114052 |
| C | 7.617869  | 2.378277 | 0.902909  |
| H | 7.762966  | 1.294743 | 0.780570  |
| O | 7.645915  | 2.051565 | 3.246480  |
| O | 9.635873  | 2.439654 | 2.204178  |
| O | 10.073593 | 1.476819 | -0.554123 |
| H | 9.483596  | 1.285383 | -1.300753 |
| O | 7.819312  | 2.669019 | -1.486171 |
| H | 6.865671  | 2.537039 | -1.364112 |
| O | 6.225083  | 2.609000 | 0.843125  |
| H | 6.045312  | 3.521199 | 1.114010  |
| C | 6.888569  | 2.318371 | 6.770693  |
| C | 6.823330  | 1.944607 | 5.434433  |
| C | 7.862471  | 3.193031 | 7.252205  |
| H | 7.874528  | 3.460071 | 8.309991  |
| H | 6.045727  | 1.268880 | 5.077233  |
| F | 5.976509  | 1.826946 | 7.622242  |

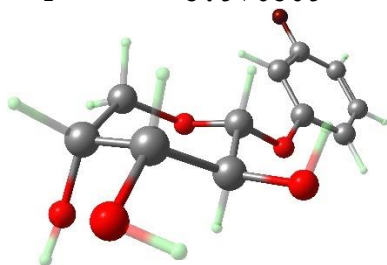

**Fig. S18** DFT-optimized geometry of **3b'**.

**Table S15** DFT-optimized cartesian coordinates of **3b'**.

|   |           |          |           |
|---|-----------|----------|-----------|
| C | 8.772268  | 3.711446 | 6.334209  |
| C | 8.752834  | 3.367128 | 4.983326  |
| H | 9.517236  | 3.763208 | 4.317698  |
| C | 7.772851  | 2.467633 | 4.545232  |
| C | 8.266965  | 2.778314 | 2.232155  |
| H | 8.151653  | 3.875880 | 2.409986  |
| C | 10.377307 | 3.083763 | 1.189664  |
| H | 11.403791 | 2.701069 | 1.272506  |
| H | 10.397603 | 4.181176 | 1.353400  |
| C | 9.836299  | 2.801061 | -0.208650 |
| H | 10.354173 | 3.479706 | -0.919479 |
| C | 8.336084  | 3.105241 | -0.244445 |
| H | 8.194273  | 4.202218 | -0.119080 |
| C | 7.614661  | 2.396378 | 0.902991  |
| H | 7.743913  | 1.310507 | 0.784266  |
| O | 7.638280  | 2.069446 | 3.246218  |
| O | 9.631430  | 2.443469 | 2.211493  |

|   |           |          |           |
|---|-----------|----------|-----------|
| O | 10.058764 | 1.452502 | -0.538261 |
| H | 9.470205  | 1.264844 | -1.286948 |
| O | 7.825226  | 2.675312 | -1.486502 |
| H | 6.869306  | 2.558932 | -1.366566 |
| O | 6.225272  | 2.647116 | 0.840365  |
| H | 6.059377  | 3.564420 | 1.102946  |
| C | 6.915909  | 2.277248 | 6.797028  |
| C | 6.855392  | 1.917826 | 5.452414  |
| C | 7.874492  | 3.186678 | 7.257532  |
| H | 7.939080  | 3.485132 | 8.304900  |
| H | 6.106605  | 1.218844 | 5.076740  |
| H | 6.199634  | 1.847622 | 7.501698  |
| F | 9.707215  | 4.577838 | 6.754525  |

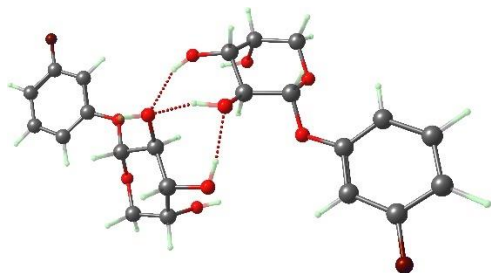

**Fig. S19** DFT-optimized geometry of **3b-H**.

**Table S16** DFT-optimized cartesian coordinates of **3b-H**.

|   |           |          |           |
|---|-----------|----------|-----------|
| C | 13.365715 | 4.683732 | -2.618749 |
| H | 13.915888 | 5.507070 | -3.080945 |
| C | 12.253316 | 4.970195 | -1.820409 |
| H | 11.911936 | 5.995988 | -1.689891 |
| C | 11.549210 | 3.909537 | -1.235957 |
| C | 10.246547 | 5.283858 | 0.221322  |
| H | 11.220639 | 5.683776 | 0.601873  |
| C | 9.366073  | 7.447694 | -0.057269 |
| H | 8.925893  | 8.071039 | -0.847112 |
| H | 10.288342 | 7.942681 | 0.311189  |
| C | 8.377910  | 7.296529 | 1.088711  |
| H | 8.289073  | 8.277685 | 1.601558  |
| C | 8.877995  | 6.272296 | 2.126076  |
| H | 9.766954  | 6.696483 | 2.645391  |
| C | 9.324503  | 4.990357 | 1.409616  |
| H | 8.444001  | 4.462657 | 1.019377  |
| O | 10.455955 | 4.074873 | -0.429427 |
| O | 9.677857  | 6.202011 | -0.660933 |
| O | 7.144198  | 6.868759 | 0.575276  |
| H | 6.641057  | 6.552294 | 1.344569  |
| O | 7.804257  | 6.083329 | 3.009763  |
| H | 7.890483  | 5.271393 | 3.557543  |
| O | 9.980190  | 4.069600 | 2.297367  |
| H | 10.882789 | 4.369377 | 2.483173  |
| C | 13.041178 | 2.339029 | -2.265215 |
| C | 11.936209 | 2.582337 | -1.458837 |
| C | 13.775015 | 3.370176 | -2.851803 |
| H | 14.635991 | 3.131886 | -3.478166 |
| H | 11.380595 | 1.761930 | -1.003268 |
| F | 13.416674 | 1.070142 | -2.475269 |
| C | 3.023530  | 3.768330 | 7.161850  |
| H | 2.453033  | 3.026393 | 7.726292  |
| C | 3.827872  | 3.345798 | 6.099037  |

|   |          |           |          |
|---|----------|-----------|----------|
| H | 3.859227 | 2.297015  | 5.807431 |
| C | 4.554876 | 4.301640  | 5.376729 |
| C | 5.881903 | 2.712819  | 4.183522 |
| H | 6.163467 | 2.299501  | 5.177595 |
| C | 5.374548 | 0.592800  | 3.295429 |
| H | 4.534141 | 0.061009  | 2.828521 |
| H | 5.648526 | 0.065441  | 4.232846 |
| C | 6.568536 | 0.589459  | 2.349755 |
| H | 6.957090 | -0.449498 | 2.286810 |
| C | 7.691156 | 1.482956  | 2.898611 |
| H | 8.133236 | 1.001799  | 3.795277 |
| C | 7.136581 | 2.845749  | 3.322693 |
| H | 6.833330 | 3.394668  | 2.413179 |
| O | 5.370783 | 3.999924  | 4.326407 |
| O | 4.915855 | 1.902658  | 3.573603 |
| O | 6.157320 | 1.058748  | 1.090717 |
| H | 6.973991 | 1.294474  | 0.621756 |
| O | 8.643299 | 1.588545  | 1.854301 |
| H | 9.287677 | 2.296216  | 2.021708 |
| O | 8.071494 | 3.588701  | 4.093900 |
| H | 8.919502 | 3.617471  | 3.612882 |
| C | 3.646534 | 6.042403  | 6.754098 |
| C | 4.467192 | 5.661897  | 5.700242 |
| C | 2.920409 | 5.117559  | 7.504380 |
| H | 2.291035 | 5.462789  | 8.326024 |
| H | 5.041421 | 6.397303  | 5.135462 |
| F | 3.558235 | 7.344739  | 7.064226 |

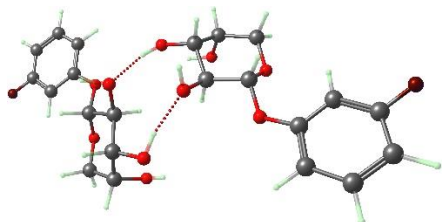

**Fig. S20** DFT-optimized geometry of **3b'-H**.

**Table S17** DFT-optimized cartesian coordinates of **3b'-H**.

|   |           |          |          |
|---|-----------|----------|----------|
| C | 14.802797 | 5.127223 | 2.046419 |
| C | 13.425526 | 5.266466 | 2.212686 |
| H | 12.847690 | 5.835700 | 1.486772 |
| C | 12.822931 | 4.607179 | 3.290728 |
| C | 10.718526 | 5.714139 | 3.045321 |
| H | 11.283987 | 6.677183 | 3.119125 |
| C | 9.580367  | 6.426114 | 1.107783 |
| H | 9.411041  | 6.093999 | 0.074535 |
| H | 10.092383 | 7.410249 | 1.082384 |
| C | 8.246295  | 6.570132 | 1.826593 |
| H | 7.722273  | 7.453244 | 1.402285 |
| C | 8.458033  | 6.816950 | 3.331289 |
| H | 8.894715  | 7.831481 | 3.469861 |
| C | 9.450077  | 5.800035 | 3.895615 |
| H | 8.989848  | 4.802253 | 3.881251 |
| O | 11.486355 | 4.678532 | 3.564795 |
| O | 10.416628 | 5.448316 | 1.706943 |
| O | 7.495507  | 5.396485 | 1.653473 |
| H | 6.808692  | 5.437042 | 2.340728 |
| O | 7.195359  | 6.721003 | 3.937580 |

|   |           |          |          |
|---|-----------|----------|----------|
| H | 7.267729  | 6.406133 | 4.862321 |
| O | 9.761768  | 6.082568 | 5.257652 |
| H | 10.443591 | 6.767896 | 5.301644 |
| C | 14.957141 | 3.693453 | 3.955687 |
| C | 13.584514 | 3.815904 | 4.162314 |
| C | 15.587807 | 4.353460 | 2.894986 |
| H | 16.660965 | 4.273395 | 2.715387 |
| H | 13.076522 | 3.316046 | 4.988727 |
| H | 15.551373 | 3.077532 | 4.635195 |
| F | 15.384395 | 5.759157 | 1.015596 |
| C | 1.731830  | 3.334180 | 8.144774 |
| C | 3.042811  | 3.211060 | 7.688102 |
| H | 3.671357  | 2.402493 | 8.055923 |
| C | 3.487490  | 4.107426 | 6.708244 |
| C | 5.787705  | 3.503379 | 6.897937 |
| H | 5.721761  | 3.807789 | 7.970433 |
| C | 6.748747  | 1.432059 | 7.479951 |
| H | 6.580182  | 0.357909 | 7.322718 |
| H | 6.698873  | 1.641141 | 8.568962 |
| C | 8.125910  | 1.814577 | 6.956977 |
| H | 8.888368  | 1.386408 | 7.642214 |
| C | 8.305343  | 3.342152 | 6.950971 |
| H | 8.347463  | 3.692542 | 8.009196 |
| C | 7.098433  | 4.016521 | 6.289361 |
| H | 7.075364  | 3.753194 | 5.221940 |
| O | 4.747056  | 4.079009 | 6.181224 |
| O | 5.707637  | 2.106491 | 6.796473 |
| O | 8.277880  | 1.322249 | 5.650622 |
| H | 9.038334  | 1.799430 | 5.279591 |
| O | 9.516103  | 3.586234 | 6.285269 |
| H | 9.641304  | 4.535998 | 6.082056 |
| O | 7.172666  | 5.432031 | 6.358047 |
| H | 7.450591  | 5.709786 | 7.241631 |
| C | 1.322472  | 5.179476 | 6.679266 |
| C | 2.628239  | 5.092139 | 6.200172 |
| C | 0.855752  | 4.301734 | 7.663939 |
| H | -0.162059 | 4.351515 | 8.053705 |
| H | 3.009885  | 5.774480 | 5.439008 |
| H | 0.654302  | 5.948626 | 6.284048 |
| F | 1.300334  | 2.468933 | 9.075859 |

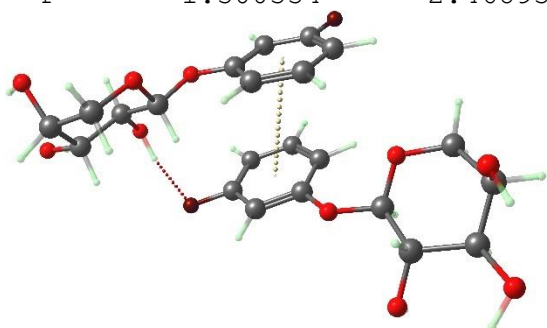

**Fig. S21** DFT-optimized geometry of **3b- $\pi$** .

**Table S18** DFT-optimized cartesian coordinates of **3b- $\pi$** .

|   |          |          |          |
|---|----------|----------|----------|
| C | 7.677611 | 6.459966 | 1.835566 |
| H | 7.242902 | 7.289898 | 1.275085 |
| C | 7.158845 | 6.145928 | 3.093852 |
| H | 6.309633 | 6.698864 | 3.488713 |

|   |           |           |           |
|---|-----------|-----------|-----------|
| C | 7.685521  | 5.055639  | 3.797207  |
| C | 6.451953  | 5.469109  | 5.800757  |
| H | 6.877508  | 6.501916  | 5.793511  |
| C | 4.232231  | 6.282104  | 6.041536  |
| H | 3.258882  | 6.186333  | 5.541007  |
| H | 4.533107  | 7.349549  | 6.022080  |
| C | 4.114554  | 5.819090  | 7.488947  |
| H | 3.521485  | 6.574319  | 8.046800  |
| C | 5.512505  | 5.736930  | 8.107939  |
| H | 5.926597  | 6.767646  | 8.183072  |
| C | 6.447188  | 4.908954  | 7.224118  |
| H | 6.051693  | 3.884589  | 7.159006  |
| O | 7.232120  | 4.632906  | 5.012639  |
| O | 5.142080  | 5.494927  | 5.291908  |
| O | 3.498089  | 4.555779  | 7.524890  |
| H | 3.679305  | 4.198029  | 8.408651  |
| O | 5.397234  | 5.150660  | 9.384487  |
| H | 6.275554  | 4.808634  | 9.614662  |
| O | 7.726446  | 4.809598  | 7.815338  |
| H | 8.164292  | 5.672023  | 7.765159  |
| C | 9.214207  | 4.652412  | 2.004787  |
| C | 8.731486  | 4.298323  | 3.254215  |
| C | 8.711561  | 5.715121  | 1.264892  |
| H | 9.097161  | 5.924067  | 0.266778  |
| H | 9.144341  | 3.453477  | 3.805524  |
| F | 10.216094 | 3.898855  | 1.472328  |
| C | 4.560413  | 3.982623  | 2.568046  |
| H | 4.308720  | 3.568349  | 3.545545  |
| C | 5.467880  | 3.307456  | 1.748257  |
| H | 5.879211  | 2.349765  | 2.059956  |
| C | 5.814574  | 3.864329  | 0.509557  |
| C | 7.513174  | 2.256055  | 0.043458  |
| H | 7.939365  | 2.461848  | 1.050486  |
| C | 7.453573  | -0.066088 | 0.497446  |
| H | 6.739352  | -0.901147 | 0.480242  |
| H | 7.829384  | 0.052814  | 1.535375  |
| C | 8.629413  | -0.380532 | -0.422617 |
| H | 9.244129  | -1.168703 | 0.062870  |
| C | 9.489476  | 0.874143  | -0.598687 |
| H | 9.985959  | 1.105143  | 0.369490  |
| C | 8.630712  | 2.079975  | -0.987398 |
| H | 8.136636  | 1.868872  | -1.947761 |
| O | 6.712151  | 3.316566  | -0.359313 |
| O | 6.734060  | 1.084572  | 0.094131  |
| O | 8.148948  | -0.809627 | -1.672451 |
| H | 8.893588  | -0.704791 | -2.286481 |
| O | 10.449367 | 0.614950  | -1.600929 |
| H | 10.724784 | 1.480355  | -1.943397 |
| O | 9.447254  | 3.213976  | -1.186646 |
| H | 9.866376  | 3.442730  | -0.342237 |
| C | 4.339292  | 5.708901  | 0.929770  |
| C | 5.240246  | 5.070585  | 0.089086  |
| C | 3.983633  | 5.189917  | 2.172003  |
| H | 3.279875  | 5.730333  | 2.806015  |
| H | 5.516415  | 5.502135  | -0.873110 |
| F | 3.817607  | 6.884795  | 0.536619  |

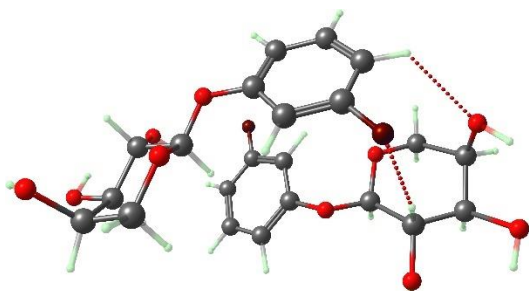

**Fig. S22** DFT-optimized geometry of **3b'- $\pi$** .

**Table S19** DFT-optimized cartesian coordinates of **3b'- $\pi$** .

|   |           |           |           |
|---|-----------|-----------|-----------|
| C | 11.544681 | 5.180269  | 4.824575  |
| C | 10.498383 | 4.586400  | 5.523073  |
| H | 9.543714  | 4.390846  | 5.041506  |
| C | 10.721462 | 4.218507  | 6.855670  |
| C | 8.526058  | 4.193544  | 7.786881  |
| H | 8.675208  | 5.249250  | 8.122765  |
| C | 6.514740  | 4.746529  | 6.652349  |
| H | 6.089358  | 4.672459  | 5.642249  |
| H | 6.569162  | 5.818568  | 6.932330  |
| C | 5.624925  | 4.011390  | 7.648383  |
| H | 4.692341  | 4.599993  | 7.780154  |
| C | 6.343245  | 3.930558  | 8.998871  |
| H | 6.404429  | 4.960011  | 9.419342  |
| C | 7.767611  | 3.393309  | 8.846179  |
| H | 7.722111  | 2.358835  | 8.480123  |
| O | 9.766258  | 3.584078  | 7.601597  |
| O | 7.812812  | 4.186626  | 6.577027  |
| O | 5.343665  | 2.721008  | 7.167581  |
| H | 5.098511  | 2.189418  | 7.942012  |
| O | 5.592988  | 3.089372  | 9.846335  |
| H | 6.196905  | 2.781150  | 10.540306 |
| O | 8.408557  | 3.346815  | 10.106351 |
| H | 8.544165  | 4.253000  | 10.420390 |
| C | 13.001137 | 5.012332  | 6.725717  |
| C | 11.971477 | 4.420780  | 7.457637  |
| C | 12.798159 | 5.403682  | 5.396738  |
| H | 13.578748 | 5.895309  | 4.812602  |
| H | 12.107885 | 4.109042  | 8.494343  |
| H | 13.973799 | 5.180612  | 7.194085  |
| F | 11.348773 | 5.524874  | 3.546491  |
| C | 8.237045  | 1.121461  | 5.741984  |
| C | 9.603768  | 1.016621  | 5.508194  |
| H | 10.252991 | 0.580269  | 6.263473  |
| C | 10.094301 | 1.452569  | 4.271905  |
| C | 12.387374 | 1.399142  | 4.920181  |
| H | 12.125356 | 2.141976  | 5.705683  |
| C | 13.426227 | 0.023010  | 6.541704  |
| H | 13.399867 | -1.017070 | 6.895571  |
| H | 13.146664 | 0.689085  | 7.384488  |
| C | 14.839635 | 0.370982  | 6.082858  |
| H | 15.481240 | 0.459010  | 6.986071  |
| C | 14.820489 | 1.719676  | 5.358658  |
| H | 14.589521 | 2.517379  | 6.097004  |
| C | 13.734061 | 1.741018  | 4.280702  |
| H | 13.944567 | 0.944717  | 3.550861  |

|   |           |           |          |
|---|-----------|-----------|----------|
| O | 11.416427 | 1.402451  | 3.927867 |
| O | 12.470812 | 0.115870  | 5.499920 |
| O | 15.317229 | -0.629035 | 5.217293 |
| H | 16.055569 | -0.223273 | 4.734791 |
| O | 16.088865 | 1.931301  | 4.775397 |
| H | 15.948352 | 2.560815  | 4.049733 |
| O | 13.773455 | 2.961033  | 3.572872 |
| H | 13.424928 | 3.665345  | 4.141215 |
| C | 7.856136  | 2.046367  | 3.578552 |
| C | 9.221300  | 1.965839  | 3.302984 |
| C | 7.341090  | 1.626685  | 4.809276 |
| H | 6.287904  | 1.715743  | 5.073108 |
| H | 9.639125  | 2.303875  | 2.353378 |
| H | 7.179180  | 2.453831  | 2.823108 |
| F | 7.772031  | 0.709274  | 6.940445 |

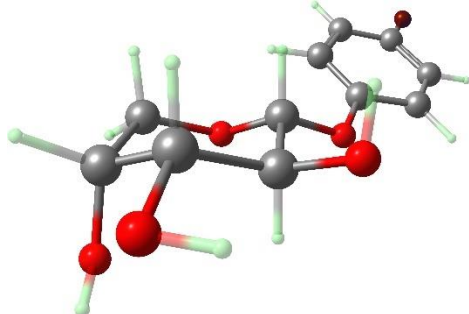

**Fig. S23** DFT-optimized geometry of **3c**.

**Table S20** DFT-optimized cartesian coordinates of **3c**.

|   |           |          |           |
|---|-----------|----------|-----------|
| C | 8.842698  | 3.673601 | 6.349460  |
| C | 8.805242  | 3.298007 | 5.003076  |
| H | 9.588974  | 3.629363 | 4.323379  |
| C | 7.784865  | 2.453064 | 4.548082  |
| C | 8.268545  | 2.757483 | 2.234818  |
| H | 8.137442  | 3.853445 | 2.415379  |
| C | 10.367253 | 3.119460 | 1.187657  |
| H | 11.404009 | 2.763410 | 1.262997  |
| H | 10.358746 | 4.215505 | 1.363125  |
| C | 9.829699  | 2.837687 | -0.212131 |
| H | 10.326308 | 3.538228 | -0.917035 |
| C | 8.321287  | 3.100242 | -0.240321 |
| H | 8.149616  | 4.192188 | -0.107998 |
| C | 7.622609  | 2.365983 | 0.905373  |
| H | 7.781207  | 1.284511 | 0.781096  |
| O | 7.656808  | 2.038276 | 3.248543  |
| O | 9.641391  | 2.448762 | 2.203609  |
| O | 10.089060 | 1.499669 | -0.556808 |
| H | 9.500080  | 1.301724 | -1.302558 |
| O | 7.817831  | 2.663753 | -1.483182 |
| H | 6.866156  | 2.519311 | -1.359414 |
| O | 6.226675  | 2.578939 | 0.846598  |
| H | 6.036370  | 3.488891 | 1.118090  |
| C | 6.864883  | 2.336646 | 6.787105  |
| C | 6.819946  | 1.971802 | 5.443237  |
| C | 7.875887  | 3.191283 | 7.224693  |
| H | 6.037994  | 1.312495 | 5.061812  |
| H | 6.122706  | 1.972858 | 7.500526  |
| H | 9.629831  | 4.327909 | 6.729529  |

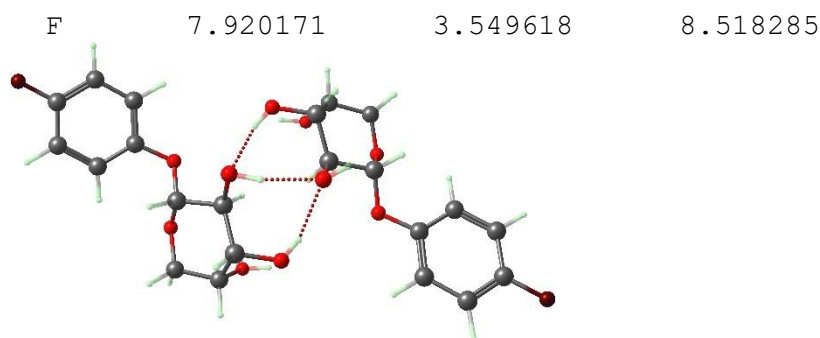

**Fig. S24** DFT-optimized geometry of **3c-H**.

**Table S21** DFT-optimized cartesian coordinates of **3c-H**.

|   |           |           |          |
|---|-----------|-----------|----------|
| C | 13.300324 | 5.996161  | 1.098936 |
| C | 12.027617 | 5.595255  | 1.515220 |
| H | 11.159823 | 5.776975  | 0.882263 |
| C | 11.879265 | 4.915670  | 2.730732 |
| C | 9.508693  | 5.147124  | 2.834569 |
| H | 9.687802  | 6.244688  | 2.780546 |
| C | 7.879739  | 5.214400  | 1.133956 |
| H | 7.672581  | 4.760496  | 0.155027 |
| H | 7.972300  | 6.312644  | 1.001421 |
| C | 6.729474  | 4.919185  | 2.086387 |
| H | 5.843285  | 5.498620  | 1.749833 |
| C | 7.078561  | 5.376913  | 3.510256 |
| H | 7.105510  | 6.485849  | 3.538626 |
| C | 8.466191  | 4.865561  | 3.916284 |
| H | 8.415536  | 3.767312  | 4.025523 |
| O | 10.672554 | 4.491456  | 3.218424 |
| O | 9.100328  | 4.659598  | 1.584185 |
| O | 6.470352  | 3.538029  | 2.079190 |
| H | 5.938832  | 3.366940  | 2.873279 |
| O | 6.042782  | 4.869894  | 4.333074 |
| H | 6.242010  | 4.971682  | 5.278582 |
| O | 8.941672  | 5.486869  | 5.103500 |
| H | 8.230402  | 5.486734  | 5.770210 |
| C | 14.272387 | 5.007746  | 3.092361 |
| C | 13.002051 | 4.619714  | 3.514629 |
| C | 14.405586 | 5.700036  | 1.889494 |
| H | 12.854120 | 4.088437  | 4.456926 |
| H | 15.161325 | 4.789002  | 3.687459 |
| H | 13.444442 | 6.525713  | 0.155017 |
| F | 15.627160 | 6.085312  | 1.482877 |
| C | 2.522122  | 1.716938  | 9.293221 |
| C | 3.801955  | 1.790471  | 8.734499 |
| H | 4.622112  | 1.212876  | 9.160189 |
| C | 4.011253  | 2.573714  | 7.593531 |
| C | 6.398500  | 2.538226  | 7.708126 |
| H | 6.280278  | 2.976775  | 8.731097 |
| C | 7.921830  | 0.909482  | 8.465038 |
| H | 8.030384  | -0.183332 | 8.482403 |
| H | 7.897845  | 1.278551  | 9.511268 |
| C | 9.102198  | 1.530037  | 7.733064 |
| H | 10.007574 | 1.399047  | 8.363239 |
| C | 8.894128  | 3.042414  | 7.519221 |
| H | 8.955360  | 3.552180  | 8.507590 |
| C | 7.494473  | 3.294340  | 6.951121 |



|   |          |          |           |
|---|----------|----------|-----------|
| H | 7.454387 | 2.951237 | 5.909111  |
| O | 5.230547 | 2.713057 | 6.980576  |
| O | 6.689761 | 1.176442 | 7.814347  |
| O | 9.246324 | 0.905684 | 6.485560  |
| H | 9.823943 | 1.495017 | 5.971075  |
| O | 9.930606 | 3.454664 | 6.665931  |
| H | 9.702963 | 4.252380 | 6.138064  |
| O | 7.165972 | 4.692846 | 6.920404  |
| H | 7.027151 | 5.024638 | 7.820168  |
| C | 1.667850 | 3.176538 | 7.549485  |
| C | 2.945211 | 3.260795 | 6.999167  |
| C | 1.472610 | 2.408594 | 8.697085  |
| H | 3.141017 | 3.855833 | 6.104744  |
| H | 0.820579 | 3.702482 | 7.105066  |
| H | 2.328175 | 1.111561 | 10.180873 |
| F | 0.244353 | 2.330779 | 9.232839  |

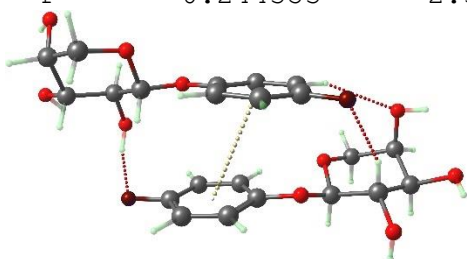

**Fig. S25** DFT-optimized geometry of **3c- $\pi$** .

**Table. S22** DFT-optimized cartesian coordinates of **3c- $\pi$** .

|   |           |           |           |
|---|-----------|-----------|-----------|
| C | 0.982593  | 0.633011  | -5.225089 |
| C | 2.367405  | 0.454547  | -5.199918 |
| H | 2.854200  | 0.076557  | -4.305210 |
| C | 3.119228  | 0.697838  | -6.356490 |
| C | 5.344827  | 0.467533  | -5.414622 |
| H | 5.328194  | 1.468251  | -4.915355 |
| C | 5.906829  | -0.696814 | -3.409103 |
| H | 5.486769  | -1.487988 | -2.772414 |
| H | 5.991867  | 0.229922  | -2.805369 |
| C | 7.286911  | -1.103136 | -3.905920 |
| H | 7.984285  | -1.113161 | -3.042175 |
| C | 7.770050  | -0.062438 | -4.917128 |
| H | 7.930396  | 0.897837  | -4.376568 |
| C | 6.725863  | 0.165274  | -6.010105 |
| H | 6.607233  | -0.764083 | -6.584906 |
| O | 4.457362  | 0.450759  | -6.480908 |
| O | 4.993892  | -0.522163 | -4.475941 |
| O | 7.205565  | -2.373103 | -4.507136 |
| H | 7.991333  | -2.457946 | -5.070809 |
| O | 8.974880  | -0.523312 | -5.486458 |
| H | 9.082331  | -0.054500 | -6.329126 |
| O | 7.182663  | 1.139474  | -6.927538 |
| H | 7.200273  | 2.000963  | -6.485349 |
| C | 1.106871  | 1.318520  | -7.556361 |
| C | 2.488058  | 1.141883  | -7.526382 |
| C | 0.380127  | 1.052914  | -6.401596 |
| H | 3.100678  | 1.317584  | -8.411891 |
| H | 0.591789  | 1.649558  | -8.460046 |
| H | 0.373023  | 0.394451  | -4.352703 |
| F | -0.979086 | 1.174972  | -6.441086 |

|   |           |           |           |
|---|-----------|-----------|-----------|
| C | 3.239766  | -2.265759 | -8.399426 |
| C | 1.910956  | -2.313902 | -7.964963 |
| H | 1.108360  | -2.147877 | -8.680798 |
| C | 1.632696  | -2.591350 | -6.622278 |
| C | -0.719742 | -2.298301 | -6.871930 |
| H | -0.536334 | -1.357105 | -7.439148 |
| C | -2.025877 | -3.168010 | -8.649353 |
| H | -2.076021 | -4.062141 | -9.286427 |
| H | -1.859189 | -2.282620 | -9.298620 |
| C | -3.345533 | -2.992902 | -7.905099 |
| H | -4.115404 | -2.669322 | -8.638205 |
| C | -3.187331 | -1.898530 | -6.847161 |
| H | -3.052802 | -0.922813 | -7.364381 |
| C | -1.951316 | -2.139192 | -5.975132 |
| H | -2.073752 | -3.092229 | -5.439132 |
| O | 0.374429  | -2.603718 | -6.078190 |
| O | -0.930320 | -3.358575 | -7.775784 |
| O | -3.707099 | -4.205317 | -7.291428 |
| H | -4.359531 | -3.967951 | -6.612966 |
| O | -4.352735 | -1.883804 | -6.050220 |
| H | -4.104991 | -1.459083 | -5.213482 |
| O | -1.855875 | -1.124687 | -4.996478 |
| H | -1.726369 | -0.275511 | -5.448378 |
| C | 4.004359  | -2.834896 | -6.166909 |
| C | 2.681854  | -2.863635 | -5.733105 |
| C | 4.263186  | -2.519638 | -7.496970 |
| H | 2.436367  | -3.081154 | -4.692136 |
| H | 4.840184  | -3.009194 | -5.488523 |
| H | 3.483768  | -2.035802 | -9.438389 |
| F | 5.546499  | -2.442243 | -7.913911 |

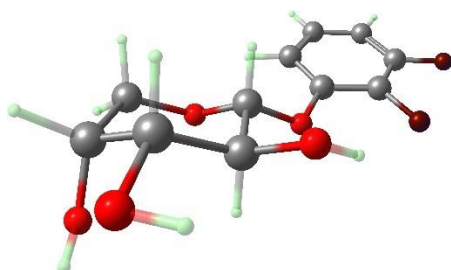

**Fig. S26** DFT-optimized geometry of **3d**.

**Table S23** DFT-optimized cartesian coordinates of **3d**.

|   |           |          |           |
|---|-----------|----------|-----------|
| C | 8.925425  | 3.502409 | 6.439579  |
| C | 8.984599  | 3.094811 | 5.103966  |
| C | 7.886611  | 2.440283 | 4.535452  |
| C | 8.397391  | 2.769205 | 2.231185  |
| H | 8.212284  | 3.845844 | 2.443825  |
| C | 10.404261 | 3.222000 | 1.085371  |
| H | 11.455054 | 2.901509 | 1.084073  |
| H | 10.368093 | 4.313748 | 1.277400  |
| C | 9.788163  | 2.938993 | -0.283669 |
| H | 10.211329 | 3.673739 | -1.000990 |
| C | 8.268731  | 3.134502 | -0.228630 |
| H | 8.041828  | 4.209184 | -0.071514 |
| C | 7.693592  | 2.353497 | 0.943556  |
| H | 7.920175  | 1.281465 | 0.794967  |
| O | 7.838055  | 1.990787 | 3.250384  |

|   |           |          |           |
|---|-----------|----------|-----------|
| O | 9.773550  | 2.515094 | 2.144009  |
| O | 10.090153 | 1.621275 | -0.671932 |
| H | 9.463553  | 1.407415 | -1.381928 |
| O | 7.728964  | 2.681701 | -1.452444 |
| H | 6.776306  | 2.568375 | -1.315497 |
| O | 6.307376  | 2.601108 | 0.991935  |
| H | 5.949065  | 2.103405 | 1.741970  |
| C | 6.708441  | 2.596044 | 6.644197  |
| C | 6.742381  | 2.197918 | 5.308125  |
| C | 7.793328  | 3.254027 | 7.218848  |
| H | 7.730584  | 3.554839 | 8.266057  |
| H | 9.875834  | 3.249624 | 4.496321  |
| H | 9.783648  | 4.010851 | 6.884336  |
| F | 5.686485  | 1.593341 | 4.756150  |
| F | 5.608420  | 2.346191 | 7.359357  |

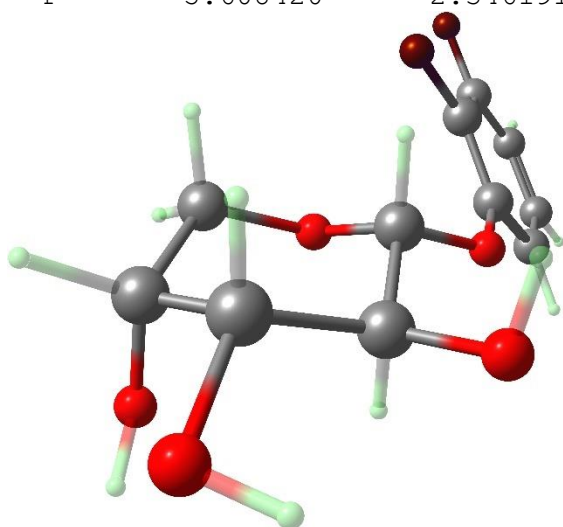

**Fig. S27** DFT-optimized geometry of **3d'**.

**Table S24** DFT-optimized cartesian coordinates of **3d'**.

|   |           |          |           |
|---|-----------|----------|-----------|
| C | 8.745447  | 3.799521 | 6.347485  |
| C | 8.430154  | 3.769861 | 4.985830  |
| C | 7.581045  | 2.772615 | 4.484992  |
| C | 8.044973  | 3.089858 | 2.150673  |
| H | 8.094953  | 4.200732 | 2.145179  |
| C | 10.271448 | 2.971546 | 1.387715  |
| H | 11.218889 | 2.482821 | 1.652545  |
| H | 10.414495 | 4.069896 | 1.435642  |
| C | 9.866273  | 2.570961 | -0.028116 |
| H | 10.546354 | 3.084377 | -0.740647 |
| C | 8.430459  | 3.032782 | -0.302283 |
| H | 8.418988  | 4.145174 | -0.339067 |
| C | 7.488255  | 2.587316 | 0.820576  |
| H | 7.484956  | 1.488347 | 0.866991  |
| O | 7.207087  | 2.646326 | 3.180054  |
| O | 9.322376  | 2.556650 | 2.354005  |
| O | 9.950381  | 1.173395 | -0.160174 |
| H | 9.435826  | 0.952792 | -0.953049 |
| O | 8.017342  | 2.489316 | -1.536210 |
| H | 7.046951  | 2.498577 | -1.530248 |
| O | 6.162375  | 2.985441 | 0.537448  |
| H | 6.089559  | 3.943853 | 0.656116  |
| C | 7.339108  | 1.901568 | 6.741585  |

|   |          |          |          |
|---|----------|----------|----------|
| C | 7.038051 | 1.842695 | 5.382791 |
| C | 8.204857 | 2.880554 | 7.238056 |
| H | 8.470340 | 2.947573 | 8.294243 |
| H | 6.381111 | 1.073826 | 4.973420 |
| H | 6.903653 | 1.168271 | 7.423731 |
| F | 8.956701 | 4.715546 | 4.191243 |
| F | 9.576028 | 4.753954 | 6.779009 |

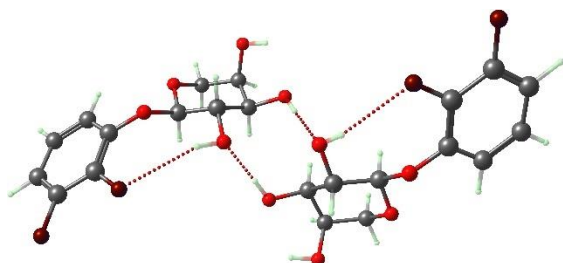

**Fig. S28** DFT-optimized geometry of **3d-H**.

**Table S25** DFT-optimized cartesian coordinates of **3d-H**.

|   |           |           |          |
|---|-----------|-----------|----------|
| C | 12.737758 | 5.478622  | 2.420956 |
| C | 11.415751 | 5.125685  | 2.140890 |
| C | 11.008256 | 3.800082  | 2.314947 |
| C | 8.707146  | 3.829199  | 2.868654 |
| H | 9.088899  | 3.936548  | 3.908531 |
| C | 7.171603  | 5.560074  | 3.186934 |
| H | 6.853439  | 6.501083  | 2.718099 |
| H | 7.528941  | 5.777144  | 4.214423 |
| C | 5.987870  | 4.601723  | 3.259669 |
| H | 5.289835  | 4.982672  | 4.035500 |
| C | 6.432863  | 3.191028  | 3.683583 |
| H | 6.767918  | 3.216493  | 4.740906 |
| C | 7.624220  | 2.755430  | 2.833254 |
| H | 7.296362  | 2.649808  | 1.784350 |
| O | 9.740774  | 3.369173  | 2.037064 |
| O | 8.235997  | 5.054588  | 2.393994 |
| O | 5.364509  | 4.540185  | 2.001046 |
| H | 4.821295  | 3.734877  | 2.026688 |
| O | 5.308718  | 2.360676  | 3.524105 |
| H | 5.553192  | 1.411957  | 3.591313 |
| O | 8.146370  | 1.536025  | 3.333275 |
| H | 8.982931  | 1.356299  | 2.875472 |
| C | 13.238172 | 3.206737  | 3.043875 |
| C | 11.917929 | 2.841322  | 2.775338 |
| C | 13.654878 | 4.523628  | 2.869562 |
| H | 14.693945 | 4.776394  | 3.088310 |
| H | 10.683503 | 5.850368  | 1.784061 |
| H | 13.062868 | 6.511918  | 2.282095 |
| F | 11.516243 | 1.577589  | 2.960184 |
| F | 14.089288 | 2.276423  | 3.482438 |
| C | 0.743256  | -3.287264 | 5.129889 |
| C | 2.048788  | -3.024396 | 5.551831 |
| C | 2.993471  | -2.582995 | 4.621623 |
| C | 4.563030  | -1.220921 | 5.759108 |
| H | 3.780882  | -0.446570 | 5.593865 |
| C | 4.879464  | -0.545135 | 7.974264 |
| H | 4.910957  | -0.970018 | 8.986816 |
| H | 4.075015  | 0.217592  | 7.934454 |

|   |           |           |          |
|---|-----------|-----------|----------|
| C | 6.215595  | 0.120677  | 7.660339 |
| H | 6.279342  | 1.051662  | 8.262969 |
| C | 6.308209  | 0.515501  | 6.176979 |
| H | 5.583727  | 1.329915  | 5.971009 |
| C | 5.917372  | -0.679701 | 5.311935 |
| H | 6.659780  | -1.484356 | 5.453310 |
| O | 4.296799  | -2.333541 | 4.943873 |
| O | 4.580373  | -1.620932 | 7.096095 |
| O | 7.261060  | -0.763652 | 7.978848 |
| H | 8.039876  | -0.412751 | 7.515891 |
| O | 7.631476  | 0.941262  | 5.961757 |
| H | 7.815492  | 1.056543  | 5.004916 |
| O | 5.847464  | -0.280318 | 3.953136 |
| H | 5.464923  | -1.010400 | 3.440663 |
| C | 1.321833  | -2.673165 | 2.873625 |
| C | 2.625794  | -2.394027 | 3.284774 |
| C | 0.374604  | -3.119185 | 3.791539 |
| H | -0.637516 | -3.327652 | 3.439854 |
| H | 2.363584  | -3.158062 | 6.587521 |
| H | 0.001224  | -3.636220 | 5.851219 |
| F | 3.528642  | -1.939280 | 2.404825 |
| F | 0.998591  | -2.494193 | 1.591243 |

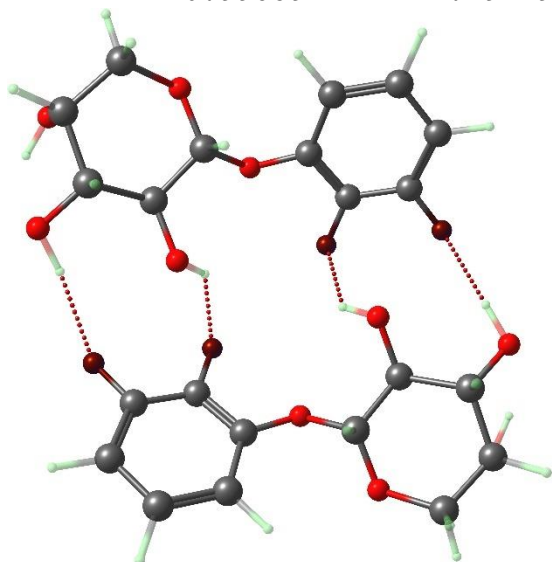

**Fig. S29** DFT-optimized geometry of **3d-H\_a**.

**Table S26** DFT-optimized cartesian coordinates of **3d-H\_a**.

|   |          |          |           |
|---|----------|----------|-----------|
| C | 6.890122 | 7.588356 | 3.722183  |
| C | 6.197776 | 6.635124 | 2.971017  |
| C | 5.160708 | 5.907509 | 3.566164  |
| C | 4.014741 | 5.230446 | 1.595123  |
| H | 3.933208 | 6.327259 | 1.430668  |
| C | 4.606991 | 4.769262 | -0.636114 |
| H | 5.395869 | 4.250309 | -1.197593 |
| H | 4.590146 | 5.832494 | -0.952079 |
| C | 3.254071 | 4.137394 | -0.957145 |
| H | 2.993622 | 4.414888 | -2.000848 |
| C | 2.176035 | 4.695344 | -0.021313 |
| H | 2.011637 | 5.768891 | -0.249804 |
| C | 2.641607 | 4.588731 | 1.422493  |
| H | 2.751530 | 3.518449 | 1.673560  |
| O | 4.398541 | 4.986971 | 2.923903  |

|   |           |           |           |
|---|-----------|-----------|-----------|
| O | 4.964499  | 4.668062  | 0.735297  |
| O | 3.339735  | 2.741574  | -0.809259 |
| H | 2.421470  | 2.433118  | -0.740636 |
| O | 0.995435  | 3.949166  | -0.223845 |
| H | 0.429381  | 4.074369  | 0.554877  |
| O | 1.684451  | 5.230402  | 2.229441  |
| H | 1.803420  | 4.929397  | 3.140594  |
| C | 5.547348  | 7.084856  | 5.646681  |
| C | 4.858334  | 6.121454  | 4.916538  |
| C | 6.570294  | 7.824399  | 5.062005  |
| H | 7.096050  | 8.568473  | 5.662418  |
| H | 6.453791  | 6.429970  | 1.931107  |
| H | 7.699711  | 8.154665  | 3.256637  |
| F | 3.851674  | 5.432838  | 5.481995  |
| F | 5.192235  | 7.305182  | 6.923199  |
| C | -2.832842 | 6.654056  | 3.507515  |
| C | -2.070118 | 7.014673  | 4.621635  |
| C | -0.931200 | 6.269667  | 4.949662  |
| C | 0.120156  | 7.896281  | 6.335636  |
| H | -0.015516 | 8.547412  | 5.444642  |
| C | -0.585431 | 9.536478  | 7.869893  |
| H | -1.315867 | 9.655605  | 8.681830  |
| H | -0.792103 | 10.303814 | 7.095535  |
| C | 0.823266  | 9.753418  | 8.417694  |
| H | 0.930090  | 10.834840 | 8.648904  |
| C | 1.866868  | 9.377329  | 7.359692  |
| H | 1.814250  | 10.099633 | 6.518765  |
| C | 1.568296  | 7.992099  | 6.807240  |
| H | 1.694609  | 7.257475  | 7.622642  |
| O | -0.084610 | 6.555796  | 5.969730  |
| O | -0.789102 | 8.233590  | 7.342238  |
| O | 1.005614  | 8.966859  | 9.568847  |
| H | 1.967049  | 8.918848  | 9.697871  |
| O | 3.136625  | 9.411779  | 7.975823  |
| H | 3.742463  | 8.870786  | 7.445079  |
| O | 2.450426  | 7.756568  | 5.736019  |
| H | 2.451154  | 6.806294  | 5.557584  |
| C | -1.359855 | 4.812838  | 3.063213  |
| C | -0.605024 | 5.142189  | 4.184549  |
| C | -2.482185 | 5.558261  | 2.715175  |
| H | -3.058850 | 5.267947  | 1.835473  |
| H | -2.352784 | 7.856584  | 5.253983  |
| H | -3.721450 | 7.236498  | 3.254711  |
| F | 0.480640  | 4.420019  | 4.510496  |
| F | -0.975750 | 3.771852  | 2.306869  |

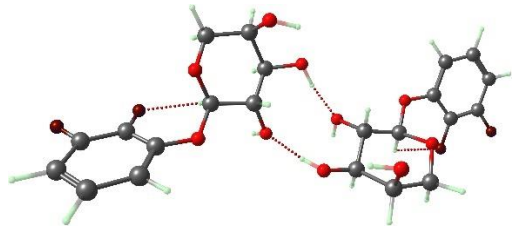

**Fig. S30** DFT-optimized geometry of **3d'-H**.

**Table S27** DFT-optimized cartesian coordinates of **3d'-H**.

|   |           |          |          |
|---|-----------|----------|----------|
| C | 14.562080 | 6.396760 | 4.152388 |
| C | 13.204800 | 6.116797 | 3.971078 |

|   |           |           |           |
|---|-----------|-----------|-----------|
| C | 12.789704 | 4.807271  | 3.690395  |
| C | 10.553784 | 5.319525  | 2.990746  |
| H | 10.354602 | 6.131537  | 3.722988  |
| C | 10.193792 | 6.824667  | 1.230932  |
| H | 10.683284 | 7.174418  | 0.311821  |
| H | 10.069003 | 7.686843  | 1.916932  |
| C | 8.830128  | 6.235715  | 0.891627  |
| H | 8.147307  | 7.069502  | 0.623044  |
| C | 8.226635  | 5.505712  | 2.104294  |
| H | 7.970410  | 6.268043  | 2.876163  |
| C | 9.258377  | 4.552957  | 2.722834  |
| H | 9.479813  | 3.745396  | 2.011668  |
| O | 11.496129 | 4.420932  | 3.504669  |
| O | 11.056880 | 5.861045  | 1.806343  |
| O | 8.971886  | 5.329149  | -0.173672 |
| H | 8.156305  | 4.802163  | -0.176619 |
| O | 7.081578  | 4.845501  | 1.638107  |
| H | 6.660834  | 4.321255  | 2.349396  |
| O | 8.765073  | 3.924532  | 3.897048  |
| H | 8.487845  | 4.591467  | 4.540064  |
| C | 15.106986 | 4.086866  | 3.833375  |
| C | 13.760086 | 3.797265  | 3.627271  |
| C | 15.523686 | 5.395959  | 4.093464  |
| H | 16.571390 | 5.657743  | 4.249338  |
| H | 13.417681 | 2.785338  | 3.405679  |
| H | 15.846055 | 3.284554  | 3.780710  |
| F | 12.329312 | 7.129846  | 4.079167  |
| F | 14.911747 | 7.662276  | 4.403250  |
| C | 0.436894  | 0.360512  | 1.896410  |
| C | 1.718845  | 0.707354  | 2.331230  |
| C | 2.522322  | 1.549224  | 1.550179  |
| C | 4.628904  | 1.117284  | 2.611354  |
| H | 4.244026  | 0.950046  | 3.640707  |
| C | 5.536039  | -1.046875 | 2.587154  |
| H | 5.531918  | -1.949080 | 1.960481  |
| H | 5.115037  | -1.303406 | 3.580422  |
| C | 6.964513  | -0.542621 | 2.751439  |
| H | 7.504710  | -1.243024 | 3.423335  |
| C | 6.983574  | 0.848971  | 3.406220  |
| H | 6.643582  | 0.742870  | 4.462111  |
| C | 6.000389  | 1.785589  | 2.693540  |
| H | 6.354266  | 1.971558  | 1.670206  |
| O | 3.772081  | 1.967854  | 1.901171  |
| O | 4.708947  | -0.100028 | 1.933649  |
| O | 7.578742  | -0.470617 | 1.488814  |
| H | 8.360063  | 0.092449  | 1.615058  |
| O | 8.307278  | 1.303159  | 3.337928  |
| H | 8.380914  | 2.223693  | 3.664581  |
| O | 5.931472  | 3.056373  | 3.327201  |
| H | 5.526304  | 2.971879  | 4.201305  |
| C | 0.718793  | 1.701034  | -0.069758 |
| C | 2.004904  | 2.041310  | 0.344618  |
| C | -0.078705 | 0.851748  | 0.703149  |
| H | -1.086938 | 0.562032  | 0.402870  |
| H | 2.648016  | 2.690779  | -0.251199 |
| H | 0.333003  | 2.094847  | -1.012489 |

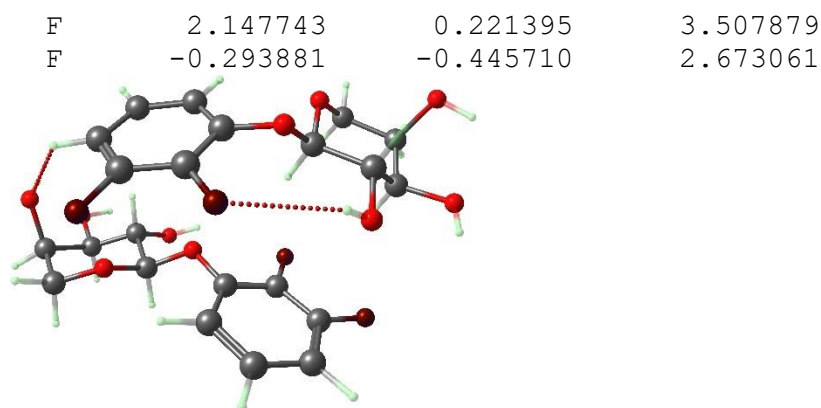

**Fig. S31** DFT-optimized geometry of **3d- $\pi$** .

**Table S28** DFT-optimized cartesian coordinates of **3d- $\pi$** .

|   |           |          |           |
|---|-----------|----------|-----------|
| C | 11.011405 | 7.045358 | 2.951022  |
| C | 10.027662 | 6.122898 | 3.314074  |
| C | 9.478387  | 6.179918 | 4.599103  |
| C | 7.402029  | 5.044268 | 4.318843  |
| H | 7.025741  | 5.998516 | 3.888290  |
| C | 6.584374  | 3.752854 | 2.516449  |
| H | 6.953306  | 3.010377 | 1.795698  |
| H | 6.190996  | 4.624757 | 1.955854  |
| C | 5.453433  | 3.150578 | 3.346460  |
| H | 4.559776  | 3.070767 | 2.693489  |
| C | 5.113813  | 4.075105 | 4.521403  |
| H | 4.657259  | 5.006844 | 4.128521  |
| C | 6.378281  | 4.452198 | 5.279660  |
| H | 6.830295  | 3.533094 | 5.694226  |
| O | 8.552613  | 5.294648 | 5.076312  |
| O | 7.704593  | 4.133658 | 3.297088  |
| O | 5.833394  | 1.880398 | 3.825418  |
| H | 5.223526  | 1.682341 | 4.554818  |
| O | 4.209237  | 3.387897 | 5.360878  |
| H | 4.185452  | 3.866384 | 6.203195  |
| O | 6.015849  | 5.363489 | 6.292833  |
| H | 6.825198  | 5.608102 | 6.765322  |
| C | 10.923127 | 8.047293 | 5.132021  |
| C | 9.917308  | 7.156889 | 5.497793  |
| C | 11.467870 | 8.009118 | 3.853997  |
| H | 12.256967 | 8.717412 | 3.596446  |
| H | 9.700821  | 5.336180 | 2.636017  |
| H | 11.446539 | 6.998623 | 1.950484  |
| F | 9.403640  | 7.197118 | 6.739070  |
| F | 11.358532 | 8.930692 | 6.035333  |
| C | 8.943768  | 1.677495 | 6.172112  |
| C | 9.939478  | 2.352899 | 6.883051  |
| C | 10.935252 | 3.038450 | 6.183088  |
| C | 11.575540 | 4.740299 | 7.694103  |
| H | 10.618493 | 5.193086 | 7.366192  |
| C | 11.081958 | 5.188411 | 9.943626  |
| H | 11.048677 | 4.676581 | 10.915325 |
| H | 10.073955 | 5.594215 | 9.721416  |
| C | 12.073907 | 6.349164 | 10.016777 |
| H | 11.612623 | 7.146824 | 10.637017 |
| C | 12.331903 | 6.916118 | 8.616252  |
| H | 11.413109 | 7.403272 | 8.241116  |



|   |           |          |           |
|---|-----------|----------|-----------|
| C | 12.692822 | 5.777168 | 7.671501  |
| H | 13.601528 | 5.275982 | 8.052546  |
| O | 11.943337 | 3.730370 | 6.795385  |
| O | 11.437191 | 4.203651 | 8.983654  |
| O | 13.280812 | 5.901323 | 10.585985 |
| H | 13.944621 | 6.568396 | 10.348209 |
| O | 13.387334 | 7.850405 | 8.720361  |
| H | 13.658350 | 8.071403 | 7.817265  |
| O | 12.891262 | 6.309624 | 6.381337  |
| H | 12.987558 | 5.564173 | 5.768730  |
| C | 9.934099  | 2.350547 | 4.092651  |
| C | 10.928163 | 3.038806 | 4.784136  |
| C | 8.935443  | 1.666370 | 4.775704  |
| H | 8.134737  | 1.191309 | 4.209380  |
| H | 9.971017  | 2.362409 | 7.972796  |
| H | 8.159422  | 1.145382 | 6.715455  |
| F | 11.852959 | 3.738354 | 4.112566  |
| F | 9.936204  | 2.397764 | 2.755835  |

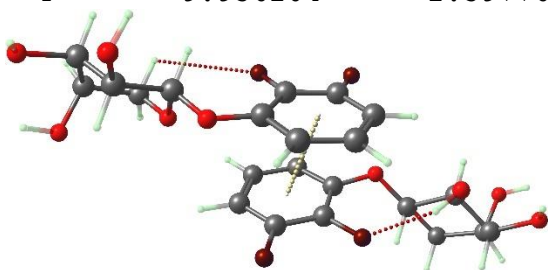

**Fig. S32** DFT-optimized geometry of **3d'- $\pi$** .

**Table S29** DFT-optimized cartesian coordinates of **3d'- $\pi$** .

|   |          |           |           |
|---|----------|-----------|-----------|
| C | 7.889677 | 2.049193  | 1.828755  |
| C | 6.707315 | 1.794975  | 1.126380  |
| C | 5.696931 | 1.023022  | 1.716557  |
| C | 4.062264 | 1.237033  | -0.050809 |
| H | 4.311849 | 2.319669  | -0.078752 |
| C | 4.285480 | 1.092343  | -2.398135 |
| H | 4.818084 | 0.493038  | -3.149686 |
| H | 4.607961 | 2.148385  | -2.497264 |
| C | 2.782201 | 0.990766  | -2.636103 |
| H | 2.534939 | 1.564536  | -3.554362 |
| C | 2.036405 | 1.615056  | -1.452677 |
| H | 2.227718 | 2.711846  | -1.456360 |
| C | 2.546654 | 1.052185  | -0.122974 |
| H | 2.350422 | -0.029923 | -0.094907 |
| O | 4.520436 | 0.661727  | 1.132101  |
| O | 4.662625 | 0.577700  | -1.134242 |
| O | 2.423982 | -0.362998 | -2.768180 |
| H | 1.461955 | -0.394722 | -2.643852 |
| O | 0.660562 | 1.348805  | -1.606803 |
| H | 0.258152 | 1.449175  | -0.729649 |
| O | 1.833048 | 1.619401  | 0.956817  |
| H | 2.092730 | 2.547591  | 1.052195  |
| C | 7.082042 | 0.810828  | 3.703336  |
| C | 5.901844 | 0.539028  | 3.017591  |
| C | 8.095727 | 1.573602  | 3.115233  |
| H | 9.052150 | 1.752404  | 3.606486  |
| H | 5.109061 | -0.068443 | 3.455881  |
| H | 7.222453 | 0.412319  | 4.710393  |

|   |           |           |           |
|---|-----------|-----------|-----------|
| F | 6.607060  | 2.279610  | -0.122328 |
| F | 8.839512  | 2.742539  | 1.197181  |
| C | 7.334952  | -1.732647 | 0.954555  |
| C | 8.544610  | -1.266309 | 1.465292  |
| C | 9.370199  | -0.435830 | 0.699107  |
| C | 11.487038 | -0.644687 | 1.798492  |
| H | 11.119461 | -1.680060 | 1.962518  |
| C | 13.660025 | -1.443206 | 1.355578  |
| H | 14.445290 | -1.342976 | 0.593572  |
| H | 13.369864 | -2.512420 | 1.423066  |
| C | 14.204491 | -0.993144 | 2.709865  |
| H | 14.911020 | -1.771976 | 3.068235  |
| C | 13.053418 | -0.875176 | 3.714058  |
| H | 12.652119 | -1.890554 | 3.922950  |
| C | 11.925248 | -0.027352 | 3.125252  |
| H | 12.322156 | 0.973658  | 2.895420  |
| O | 10.478362 | 0.146048  | 1.235498  |
| O | 12.565007 | -0.662826 | 0.905380  |
| O | 14.847889 | 0.250039  | 2.571827  |
| H | 14.912818 | 0.612119  | 3.470130  |
| O | 13.555439 | -0.284648 | 4.892923  |
| H | 12.786537 | 0.043006  | 5.385279  |
| O | 10.885950 | 0.130684  | 4.074666  |
| H | 10.201554 | -0.536346 | 3.916161  |
| C | 7.753056  | -0.558893 | -1.094056 |
| C | 8.967580  | -0.090437 | -0.593869 |
| C | 6.928130  | -1.385188 | -0.327059 |
| H | 5.954382  | -1.717196 | -0.685710 |
| H | 9.611850  | 0.577994  | -1.165882 |
| H | 7.427272  | -0.260249 | -2.091494 |
| F | 8.883953  | -1.582553 | 2.736198  |
| F | 6.558518  | -2.482559 | 1.742610  |

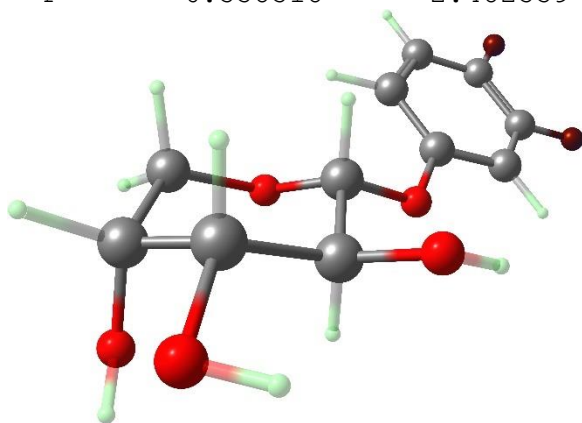

**Fig. S33** DFT-optimized geometry of **3e**.

**Table S30** DFT-optimized cartesian coordinates of **3e**.

|   |           |          |           |
|---|-----------|----------|-----------|
| C | 8.849385  | 3.679106 | 6.347586  |
| C | 8.790410  | 3.356515 | 4.987493  |
| C | 7.754841  | 2.538165 | 4.520860  |
| C | 8.283417  | 2.856288 | 2.207173  |
| H | 8.189903  | 3.953455 | 2.373206  |
| C | 10.396302 | 3.086478 | 1.183417  |
| H | 11.412113 | 2.676519 | 1.266900  |
| H | 10.444933 | 4.183484 | 1.341595  |
| C | 9.850168  | 2.811863 | -0.215776 |

|   |           |          |           |
|---|-----------|----------|-----------|
| H | 10.385493 | 3.477628 | -0.925461 |
| C | 8.356577  | 3.149186 | -0.267607 |
| H | 8.224561  | 4.245230 | -0.156416 |
| C | 7.629279  | 2.467692 | 0.883739  |
| H | 7.754799  | 1.374384 | 0.779322  |
| O | 7.600157  | 2.168100 | 3.212324  |
| O | 9.633054  | 2.472433 | 2.210756  |
| O | 10.050203 | 1.458015 | -0.540812 |
| H | 9.459492  | 1.278154 | -1.289648 |
| O | 7.855292  | 2.706891 | -1.511145 |
| H | 6.889098  | 2.696621 | -1.437179 |
| O | 6.275081  | 2.855081 | 0.813062  |
| H | 5.800358  | 2.393940 | 1.518536  |
| C | 6.879403  | 2.354510 | 6.759286  |
| C | 6.797006  | 2.033485 | 5.411660  |
| C | 7.901915  | 3.184087 | 7.233438  |
| H | 5.991706  | 1.390951 | 5.053816  |
| H | 9.567106  | 3.705930 | 4.310396  |
| H | 9.648532  | 4.311732 | 6.739437  |
| F | 5.975881  | 1.877504 | 7.618939  |
| F | 7.957426  | 3.479934 | 8.536583  |

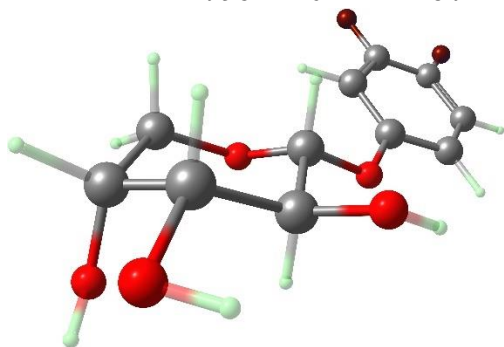

**Fig. S34** DFT-optimized geometry of **3e'**.

**Table S31** DFT-optimized cartesian coordinates of **3e'**.

|   |           |          |           |
|---|-----------|----------|-----------|
| C | 8.857181  | 3.659638 | 6.329248  |
| C | 8.799849  | 3.330338 | 4.978466  |
| C | 7.746409  | 2.528234 | 4.520700  |
| C | 8.278893  | 2.848101 | 2.208460  |
| H | 8.176988  | 3.944323 | 2.376686  |
| C | 10.392048 | 3.100748 | 1.191098  |
| H | 11.410861 | 2.698523 | 1.274991  |
| H | 10.431314 | 4.197098 | 1.355437  |
| C | 9.850975  | 2.828505 | -0.210759 |
| H | 10.380916 | 3.504319 | -0.914870 |
| C | 8.353860  | 3.150267 | -0.263537 |
| H | 8.210264  | 4.244386 | -0.147293 |
| C | 7.632175  | 2.455493 | 0.883276  |
| H | 7.772746  | 1.364328 | 0.775454  |
| O | 7.598514  | 2.154908 | 3.212441  |
| O | 9.631558  | 2.475120 | 2.213959  |
| O | 10.065631 | 1.478859 | -0.543275 |
| H | 9.476968  | 1.296302 | -1.293034 |
| O | 7.859169  | 2.708315 | -1.509842 |
| H | 6.892997  | 2.688122 | -1.436739 |
| O | 6.272888  | 2.824493 | 0.810551  |
| H | 5.804988  | 2.357859 | 1.517006  |
| C | 6.860334  | 2.385726 | 6.768700  |

|   |          |          |          |
|---|----------|----------|----------|
| C | 6.779550 | 2.054522 | 5.416213 |
| C | 7.896779 | 3.192408 | 7.228443 |
| H | 5.970770 | 1.427364 | 5.038284 |
| H | 9.598295 | 3.665212 | 4.319387 |
| H | 6.118136 | 2.028206 | 7.485339 |
| F | 9.854809 | 4.423760 | 6.781474 |
| F | 7.988692 | 3.521309 | 8.521650 |

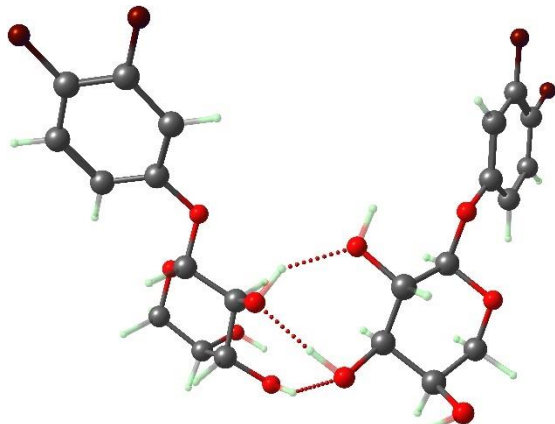

**Fig. S35** DFT-optimized geometry of **3e-H**.

**Table S32** DFT-optimized cartesian coordinates of **3e-H**.

|   |           |           |           |
|---|-----------|-----------|-----------|
| C | 10.686752 | 8.196200  | 4.424429  |
| C | 10.167617 | 7.779303  | 3.194304  |
| C | 10.706527 | 6.648192  | 2.571106  |
| C | 8.990381  | 6.513824  | 0.908684  |
| H | 8.255398  | 6.445693  | 1.743120  |
| C | 7.758683  | 8.237387  | -0.086906 |
| H | 7.901741  | 9.248767  | -0.490554 |
| H | 7.026734  | 8.286168  | 0.745037  |
| C | 7.218479  | 7.326213  | -1.181883 |
| H | 6.160283  | 7.606918  | -1.368261 |
| C | 7.240993  | 5.854125  | -0.739741 |
| H | 6.493459  | 5.700262  | 0.063594  |
| C | 8.620068  | 5.503982  | -0.180869 |
| H | 9.367271  | 5.598667  | -0.988061 |
| O | 10.256740 | 6.150752  | 1.373225  |
| O | 9.024302  | 7.812581  | 0.394819  |
| O | 8.001852  | 7.489012  | -2.337322 |
| H | 7.782113  | 6.741296  | -2.915512 |
| O | 6.897406  | 5.095123  | -1.885726 |
| H | 6.993311  | 4.131262  | -1.674430 |
| O | 8.610947  | 4.192776  | 0.368592  |
| H | 9.462307  | 4.066256  | 0.814327  |
| C | 12.280298 | 6.388900  | 4.376370  |
| C | 11.771044 | 5.952994  | 3.160478  |
| C | 11.735432 | 7.507233  | 5.018071  |
| H | 12.200999 | 5.076073  | 2.674718  |
| H | 9.380192  | 8.354115  | 2.711443  |
| H | 10.287909 | 9.076414  | 4.932734  |
| F | 13.292745 | 5.738391  | 4.952434  |
| F | 12.238294 | 7.901468  | 6.191813  |
| C | 6.819013  | -3.025780 | 1.127315  |
| C | 6.299368  | -1.732830 | 1.004781  |
| C | 7.156250  | -0.632840 | 1.133701  |
| C | 5.614983  | 0.962311  | 0.260723  |

|   |           |           |           |
|---|-----------|-----------|-----------|
| H | 5.612355  | 0.340496  | -0.662793 |
| C | 3.266269  | 1.014600  | 0.329712  |
| H | 2.441897  | 0.795062  | 1.022082  |
| H | 3.157191  | 0.368307  | -0.565667 |
| C | 3.197375  | 2.475142  | -0.095567 |
| H | 2.320540  | 2.597087  | -0.765894 |
| C | 4.453094  | 2.880222  | -0.882182 |
| H | 4.449231  | 2.364271  | -1.864149 |
| C | 5.709273  | 2.440142  | -0.125461 |
| H | 5.775900  | 3.019205  | 0.810452  |
| O | 6.745836  | 0.666665  | 1.021821  |
| O | 4.464537  | 0.707213  | 1.021015  |
| O | 3.077164  | 3.282472  | 1.050741  |
| H | 3.282189  | 4.183545  | 0.754392  |
| O | 4.374758  | 4.280710  | -1.040277 |
| H | 5.138367  | 4.616094  | -1.549878 |
| O | 6.855752  | 2.640179  | -0.939162 |
| H | 7.616259  | 2.838916  | -0.357229 |
| C | 9.013330  | -2.115083 | 1.532782  |
| C | 8.518267  | -0.825238 | 1.401956  |
| C | 8.168659  | -3.221513 | 1.389382  |
| H | 9.188734  | 0.028731  | 1.502317  |
| H | 5.232924  | -1.579064 | 0.849500  |
| H | 6.173874  | -3.901870 | 1.034075  |
| F | 10.309567 | -2.313195 | 1.785057  |
| F | 8.674033  | -4.453674 | 1.514386  |

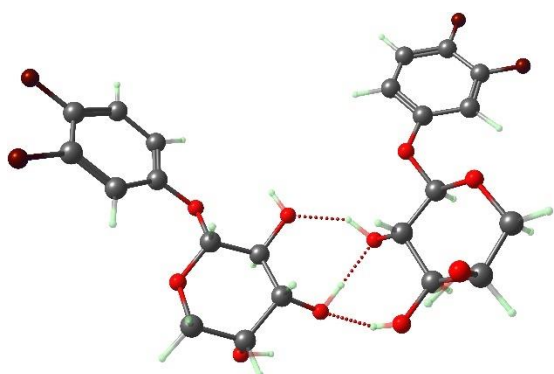

**Fig. S36** DFT-optimized geometry of **3e'-H**.

**Table S33** DFT-optimized cartesian coordinates of **3e'-H**.

|   |          |          |          |
|---|----------|----------|----------|
| C | 7.311303 | 4.616971 | 8.530706 |
| C | 6.997819 | 5.409607 | 7.430362 |
| C | 7.921754 | 5.510700 | 6.381913 |
| C | 6.425084 | 6.705881 | 4.948783 |
| H | 5.690589 | 5.879712 | 5.084044 |
| C | 4.835765 | 8.344225 | 5.502958 |
| H | 4.701358 | 9.177538 | 6.206104 |
| H | 4.033624 | 7.598581 | 5.681589 |
| C | 4.733037 | 8.861722 | 4.074641 |
| H | 3.673921 | 9.135037 | 3.882937 |
| C | 5.129201 | 7.774219 | 3.063351 |
| H | 4.350053 | 6.984479 | 3.055160 |
| C | 6.449877 | 7.120643 | 3.476574 |
| H | 7.258325 | 7.862670 | 3.362607 |
| O | 7.709060 | 6.253508 | 5.255694 |
| O | 6.107089 | 7.784062 | 5.783167 |

|   |           |           |           |
|---|-----------|-----------|-----------|
| O | 5.580625  | 9.974586  | 3.927665  |
| H | 5.673579  | 10.100583 | 2.969651  |
| O | 5.213695  | 8.425622  | 1.813836  |
| H | 5.521577  | 7.815441  | 1.115599  |
| O | 6.679767  | 5.973217  | 2.672518  |
| H | 7.644179  | 5.813019  | 2.623022  |
| C | 9.448449  | 4.055922  | 7.571652  |
| C | 9.147234  | 4.836063  | 6.455842  |
| C | 8.529932  | 3.940397  | 8.610670  |
| H | 9.852649  | 4.935034  | 5.629584  |
| H | 6.062445  | 5.965754  | 7.434119  |
| H | 10.397498 | 3.521843  | 7.651435  |
| F | 6.439928  | 4.510085  | 9.537566  |
| F | 8.803598  | 3.195153  | 9.687601  |
| C | 14.495945 | 8.173731  | -0.207476 |
| C | 13.147880 | 7.851034  | -0.335618 |
| C | 12.702812 | 6.610549  | 0.137568  |
| C | 10.375796 | 7.136073  | -0.127870 |
| H | 10.532390 | 8.006304  | 0.549596  |
| C | 9.315326  | 8.478953  | -1.728325 |
| H | 9.376915  | 8.715054  | -2.799078 |
| H | 9.469258  | 9.412176  | -1.149351 |
| C | 7.937155  | 7.910549  | -1.411560 |
| H | 7.202193  | 8.740216  | -1.479881 |
| C | 7.885842  | 7.352770  | 0.019797  |
| H | 7.954275  | 8.190445  | 0.742295  |
| C | 9.075573  | 6.420970  | 0.247794  |
| H | 8.974136  | 5.551208  | -0.424179 |
| O | 11.396328 | 6.201011  | 0.064543  |
| O | 10.357654 | 7.553061  | -1.460742 |
| O | 7.643552  | 6.889201  | -2.331455 |
| H | 6.885830  | 6.407908  | -1.963051 |
| O | 6.641673  | 6.687299  | 0.143544  |
| H | 6.605660  | 6.243051  | 1.029268  |
| O | 9.135661  | 6.021066  | 1.610966  |
| H | 9.951993  | 5.510715  | 1.721760  |
| C | 14.952252 | 6.042773  | 0.821869  |
| C | 13.603674 | 5.705190  | 0.710430  |
| C | 15.400975 | 7.279390  | 0.368652  |
| H | 13.234540 | 4.740825  | 1.062839  |
| H | 12.482988 | 8.550084  | -0.839375 |
| H | 15.674613 | 5.354842  | 1.265748  |
| F | 14.939524 | 9.350578  | -0.654603 |
| F | 16.689058 | 7.620062  | 0.473622  |

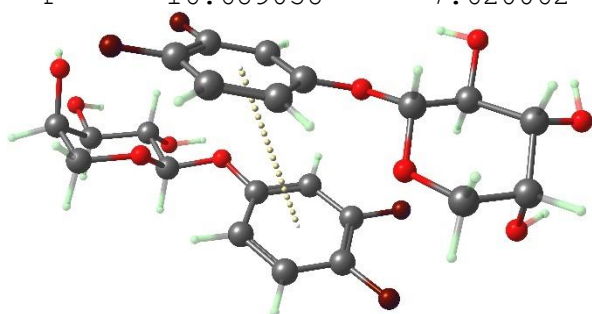

**Fig. S37** DFT-optimized geometry of **3e-π**.

**Table S34** DFT-optimized cartesian coordinates of **3e-π**.

|   |          |          |          |
|---|----------|----------|----------|
| C | 9.626825 | 4.540707 | 3.378797 |
|---|----------|----------|----------|

|   |           |           |           |
|---|-----------|-----------|-----------|
| C | 8.915565  | 4.984326  | 2.258419  |
| C | 7.549024  | 4.705027  | 2.164624  |
| C | 7.198979  | 6.013731  | 0.180537  |
| H | 7.577605  | 6.916466  | 0.711114  |
| C | 8.677951  | 6.308059  | -1.647145 |
| H | 9.417854  | 5.725676  | -2.211124 |
| H | 9.174226  | 7.200402  | -1.214370 |
| C | 7.565376  | 6.760518  | -2.589122 |
| H | 7.975975  | 7.565674  | -3.235340 |
| C | 6.402088  | 7.340185  | -1.778016 |
| H | 6.728774  | 8.283735  | -1.293514 |
| C | 5.992131  | 6.364043  | -0.685046 |
| H | 5.666993  | 5.421867  | -1.160122 |
| O | 6.755566  | 5.070448  | 1.108467  |
| O | 8.214401  | 5.453906  | -0.611678 |
| O | 7.128513  | 5.666771  | -3.353956 |
| H | 6.256647  | 5.914311  | -3.699945 |
| O | 5.327169  | 7.576656  | -2.662568 |
| H | 4.535660  | 7.690070  | -2.114969 |
| O | 4.953319  | 6.971321  | 0.053377  |
| H | 4.660296  | 6.335192  | 0.720483  |
| C | 7.628956  | 3.542278  | 4.271857  |
| C | 6.903781  | 3.985522  | 3.178159  |
| C | 8.993300  | 3.821545  | 4.381288  |
| H | 5.842154  | 3.750993  | 3.100071  |
| H | 9.433287  | 5.497779  | 1.451442  |
| H | 10.697455 | 4.733410  | 3.473537  |
| F | 7.023648  | 2.823900  | 5.223136  |
| F | 9.681648  | 3.366093  | 5.433023  |
| C | 9.512263  | 2.131278  | -0.592462 |
| C | 9.175353  | 1.552354  | 0.635829  |
| C | 7.829914  | 1.479000  | 1.007871  |
| C | 8.227952  | 0.171098  | 2.982572  |
| H | 8.708363  | -0.615942 | 2.358335  |
| C | 10.067409 | 0.297626  | 4.469708  |
| H | 10.733515 | 1.059748  | 4.894073  |
| H | 10.675775 | -0.448213 | 3.918551  |
| C | 9.316246  | -0.403375 | 5.598238  |
| H | 10.037276 | -1.063842 | 6.125853  |
| C | 8.199717  | -1.276172 | 5.016051  |
| H | 8.650412  | -2.115924 | 4.447299  |
| C | 7.346527  | -0.459133 | 4.056986  |
| H | 6.890708  | 0.376737  | 4.616432  |
| O | 7.384104  | 0.952600  | 2.192021  |
| O | 9.206008  | 0.985605  | 3.574823  |
| O | 8.777395  | 0.559626  | 6.467165  |
| H | 8.083489  | 0.105906  | 6.970944  |
| O | 7.419749  | -1.758985 | 6.089649  |
| H | 6.590982  | -2.085387 | 5.707932  |
| O | 6.372795  | -1.326287 | 3.515258  |
| H | 5.804702  | -0.799755 | 2.935925  |
| C | 7.190584  | 2.570420  | -1.041150 |
| C | 6.834493  | 1.986211  | 0.163341  |
| C | 8.530622  | 2.639646  | -1.429879 |
| H | 5.786062  | 1.948423  | 0.459216  |
| H | 9.956239  | 1.211127  | 1.311538  |

|   |           |          |           |
|---|-----------|----------|-----------|
| H | 10.555726 | 2.215713 | -0.902990 |
| F | 6.246015  | 3.094109 | -1.829514 |
| F | 8.857383  | 3.226166 | -2.585809 |

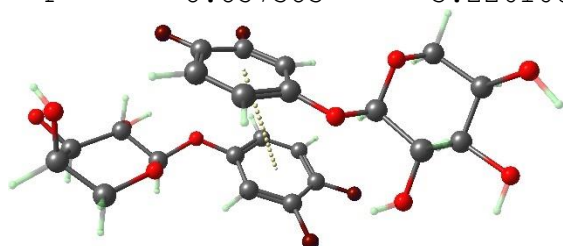

**Fig. S38** DFT-optimized geometry of  $3e'-\pi$ .

**Table S35** DFT-optimized cartesian coordinates of  $3e'-\pi$ .

|   |           |          |           |
|---|-----------|----------|-----------|
| C | 6.518750  | 5.183416 | 3.510897  |
| C | 7.628661  | 4.535937 | 4.040973  |
| C | 8.254073  | 3.540857 | 3.281770  |
| C | 9.938437  | 3.150276 | 4.934837  |
| H | 10.071436 | 4.244859 | 5.076291  |
| C | 9.562022  | 2.828653 | 7.238254  |
| H | 8.833912  | 2.349076 | 7.906850  |
| H | 9.602011  | 3.911223 | 7.479250  |
| C | 10.943592 | 2.220118 | 7.468653  |
| H | 11.318675 | 2.587874 | 8.447418  |
| C | 11.907162 | 2.686644 | 6.374108  |
| H | 12.090920 | 3.775309 | 6.479404  |
| C | 11.295416 | 2.456282 | 4.997005  |
| H | 11.104580 | 1.374620 | 4.868076  |
| O | 9.393712  | 2.891607 | 3.676113  |
| O | 9.082970  | 2.632877 | 5.918333  |
| O | 10.846769 | 0.816324 | 7.458620  |
| H | 11.751226 | 0.494294 | 7.315243  |
| O | 13.108938 | 1.958816 | 6.516505  |
| H | 13.608059 | 2.085117 | 5.695195  |
| O | 12.220158 | 2.950071 | 4.058385  |
| H | 11.854855 | 2.859180 | 3.167853  |
| C | 6.607539  | 3.821564 | 1.526461  |
| C | 7.736413  | 3.178930 | 2.032063  |
| C | 5.999841  | 4.823917 | 2.270363  |
| H | 8.243829  | 2.401443 | 1.459459  |
| H | 7.977562  | 4.831641 | 5.027207  |
| H | 6.206781  | 3.594758 | 0.537170  |
| F | 5.946700  | 6.183726 | 4.195698  |
| F | 4.934514  | 5.489650 | 1.785857  |
| C | 11.207678 | 5.618787 | 2.316300  |
| C | 10.133183 | 5.873789 | 1.473769  |
| C | 9.120977  | 6.737877 | 1.905500  |
| C | 7.914389  | 6.808711 | -0.193757 |
| H | 8.692687  | 7.425917 | -0.697249 |
| C | 7.919332  | 5.144451 | -1.881292 |
| H | 8.084650  | 4.062422 | -1.978398 |
| H | 8.673358  | 5.672043 | -2.499741 |
| C | 6.524226  | 5.504291 | -2.375032 |
| H | 6.497866  | 5.365543 | -3.475695 |
| C | 6.240330  | 6.975624 | -2.062289 |
| H | 6.915459  | 7.611668 | -2.671677 |
| C | 6.509402  | 7.260099 | -0.591578 |
| H | 5.812412  | 6.654590 | 0.010491  |



|   |           |          |           |
|---|-----------|----------|-----------|
| O | 7.985087  | 6.993633 | 1.190476  |
| O | 8.096511  | 5.450396 | -0.508631 |
| O | 5.579996  | 4.673746 | -1.739235 |
| H | 4.723317  | 5.121941 | -1.828531 |
| O | 4.887638  | 7.230451 | -2.374319 |
| H | 4.653007  | 8.065892 | -1.942371 |
| O | 6.306480  | 8.641534 | -0.385506 |
| H | 6.336081  | 8.801871 | 0.567889  |
| C | 10.287134 | 7.071000 | 3.998096  |
| C | 9.202408  | 7.342054 | 3.165905  |
| C | 11.295062 | 6.206631 | 3.578288  |
| H | 8.391167  | 7.993733 | 3.492677  |
| H | 10.069567 | 5.354852 | 0.521384  |
| H | 10.368146 | 7.524418 | 4.988218  |
| F | 12.159822 | 4.766133 | 1.910934  |
| F | 12.327638 | 5.928112 | 4.381122  |

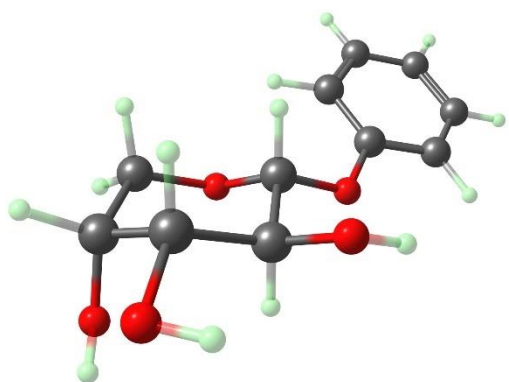

**Fig. S39** DFT-optimized geometry of **1**.

**Table S36** DFT-optimized cartesian coordinates of **1**.

|   |                   |                  |                   |
|---|-------------------|------------------|-------------------|
| C | 8.82286064363239  | 3.69516407043760 | 6.34664324945710  |
| H | 9.62704433241044  | 4.34322674156055 | 6.70505723919857  |
| C | 8.78270842926563  | 3.34980211761223 | 4.99197876915165  |
| H | 9.56229891955277  | 3.69119037285011 | 4.31261799080474  |
| C | 7.75533741421816  | 2.51808739198682 | 4.52962160788761  |
| C | 8.29280746440836  | 2.82336465100850 | 2.21554963277092  |
| H | 8.19747359285814  | 3.92014317113167 | 2.38367247101691  |
| C | 10.39576743000992 | 3.07914598041685 | 1.18249795852992  |
| H | 11.41608220398323 | 2.67780355072104 | 1.25343068964738  |
| H | 10.43594233492818 | 4.17480248798697 | 1.35357608767179  |
| C | 9.84337133098491  | 2.81833787377403 | -0.21753567534855 |
| H | 10.36641256719795 | 3.50080878752391 | -0.92064826547952 |
| C | 8.34532658192521  | 3.13786944173895 | -0.25542563147957 |
| H | 8.20032190376878  | 4.23091487382743 | -0.13172020987526 |
| C | 7.63527986695681  | 2.43617081115922 | 0.89376762635598  |
| H | 7.77630321803796  | 1.34547160504096 | 0.77982336128531  |
| O | 7.61802843230288  | 2.13185194191058 | 3.22044523766617  |
| O | 9.64539367430726  | 2.44644918616580 | 2.20635748756197  |
| O | 10.05695235761311 | 1.47193345363568 | -0.56509454866551 |
| H | 9.45582308377729  | 1.29533162089945 | -1.30643870819110 |
| O | 7.84019436384976  | 2.70297266134293 | -1.50080210086180 |
| H | 6.87534223240975  | 2.67155951112072 | -1.41579374180012 |
| O | 6.27469447335175  | 2.80264728095606 | 0.83586184240162  |
| H | 5.82116477004144  | 2.34867146835587 | 1.56005023978867  |
| C | 6.85303310227553  | 2.36807003992265 | 6.76894817001329  |
| H | 6.09880727092988  | 1.97766170952007 | 7.45725090977345  |

|   |                  |                  |                  |
|---|------------------|------------------|------------------|
| C | 6.79387226451746 | 2.02264267397620 | 5.41978653763591 |
| C | 7.86484451157389 | 3.21227122581203 | 7.24016332452094 |
| H | 7.90871310901522 | 3.48469210933719 | 8.29718096804282 |
| H | 6.00877437989580 | 1.36978167826786 | 5.03260485051868 |

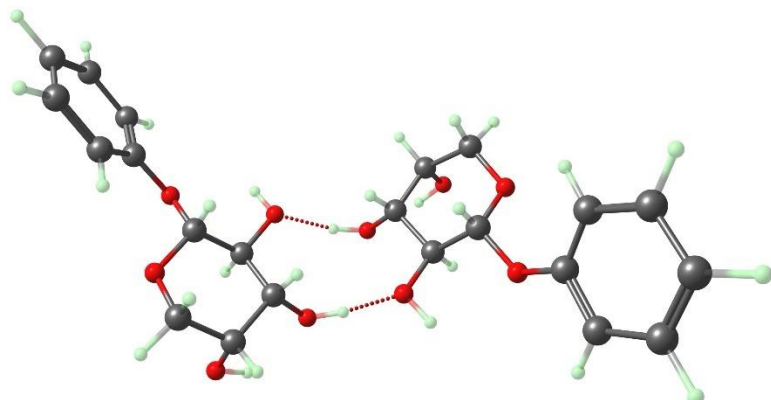

**Fig. S40** DFT-optimized geometry of **1-H**.

**Table S37** DFT-optimized cartesian coordinates of **1-H**.

|   |                   |                    |                   |
|---|-------------------|--------------------|-------------------|
| C | 7.75033507230870  | -6.91934606985017  | -6.98908287998348 |
| H | 7.48492942015779  | -5.87679781612991  | -7.18350150898734 |
| C | 6.98537649992919  | -7.65648845521636  | -6.07912277492695 |
| H | 6.11563902434091  | -7.21057729205914  | -5.59850249360033 |
| C | 7.32266972810762  | -8.99227211636235  | -5.83027173567059 |
| C | 5.84392710954291  | -9.22184419375734  | -3.95724735801833 |
| H | 6.37313256094630  | -8.35222346971174  | -3.50389492511904 |
| C | 3.76271494176555  | -8.22612158536689  | -3.54607180945431 |
| H | 2.83440233325952  | -7.97032040074606  | -4.07522719907855 |
| H | 4.21091773739795  | -7.29224109251053  | -3.14735919311970 |
| C | 3.44802779753121  | -9.16192187251279  | -2.38404697588711 |
| H | 2.94946295073407  | -8.56132229611005  | -1.59251174290746 |
| C | 4.73002509468870  | -9.76793206041022  | -1.77984344022177 |
| H | 5.28360608260714  | -8.98381805312465  | -1.23086797162766 |
| C | 5.62272306787424  | -10.29813288554426 | -2.89713239096898 |
| H | 5.10565888266927  | -11.14184764852549 | -3.38609823726142 |
| O | 6.64641326222528  | -9.79516536349854  | -4.94547532788203 |
| O | 4.62439368089036  | -8.81302805305014  | -4.50845368476445 |
| O | 2.61326127862682  | -10.19994139060627 | -2.83399224436125 |
| H | 2.66374192881759  | -10.88339041669301 | -2.14482953682694 |
| O | 4.36507501817269  | -10.81859546484218 | -0.91732093061856 |
| H | 4.71114160366230  | -10.62233649514408 | -0.02316849204754 |
| O | 6.86932792322490  | -10.70222774124318 | -2.34994849184481 |
| H | 7.42585568556643  | -10.99569201952388 | -3.08687222096977 |
| C | 9.14483279920635  | -8.84259191375031  | -7.41314410746114 |
| H | 9.98323318167415  | -9.31285768855911  | -7.93358302099058 |
| C | 8.39798404658978  | -9.58773732317078  | -6.50205700106017 |
| C | 8.82914793544632  | -7.50122793485467  | -7.65752236220955 |
| H | 9.41641048073441  | -6.91725737001579  | -8.36989213912376 |
| C | 7.59453926585635  | -5.59143110837420  | 5.14272016600410  |
| H | 8.48946489039291  | -4.96356295591656  | 5.14120343696702  |
| C | 7.61178504055504  | -6.80030511228741  | 4.43910174896252  |
| H | 8.51552371288347  | -7.12972054965544  | 3.92828348677384  |
| C | 6.46683820399241  | -7.60603360360088  | 4.44055508486151  |
| C | 7.28226246154600  | -9.09668987221754  | 2.74934759477718  |
| H | 7.43485036454389  | -8.19749483674235  | 2.10935599689884  |
| C | 9.46280838991399  | -9.83632616782107  | 2.31066510780241  |
| H | 10.35794574253707 | -10.17771904853301 | 2.84860001712127  |

|   |                  |                    |                   |
|---|------------------|--------------------|-------------------|
| H | 9.72783066519403 | -8.93291586678801  | 1.72280203128281  |
| C | 8.99130929107550 | -10.92943020600678 | 1.35763873261233  |
| H | 9.70597460946932 | -10.96600008978571 | 0.50687651735403  |
| C | 7.59322688464176 | -10.62154516945232 | 0.78731356076660  |
| H | 7.66310706627327 | -9.78046163743402  | 0.07345283114741  |
| C | 6.65610226537367 | -10.21478914122873 | 1.91962957515731  |
| H | 6.51470059113038 | -11.08285363754613 | 2.58629681069786  |
| O | 6.37485773320816 | -8.79873659298251  | 3.76729544227736  |
| O | 8.49943123725497 | -9.51213373757682  | 3.30072190264243  |
| O | 8.95162311213061 | -12.15876972348932 | 2.03914434812686  |
| H | 8.41005187976269 | -12.74200209730058 | 1.48141393172562  |
| O | 7.10171121342485 | -11.77623415529848 | 0.14968552720184  |
| H | 6.92984684867844 | -11.56129577689886 | -0.78943152039278 |
| O | 5.42222553398885 | -9.77696442163429  | 1.37020968252722  |
| H | 4.86165589602052 | -9.49251761373143  | 2.10743098238755  |
| C | 5.33050489461410 | -6.01424359990453  | 5.86306859104483  |
| H | 4.43893288084673 | -5.71578483624412  | 6.42071861280079  |
| C | 5.32860965010930 | -7.21716784430638  | 5.15865699659562  |
| C | 6.46184238448704 | -5.19037517598589  | 5.85366798013881  |
| H | 6.46129959411908 | -4.24631682770750  | 6.40332962252808  |
| H | 8.63169937005386 | -10.63446955960898 | -6.29542990422227 |
| H | 4.45387588722302 | -7.87114792104976  | 5.15051781242464  |

**Table S38** Enthalpy and Gibbs free energy of **3a-e** and their H-bonded and  $\pi$ - $\pi$  stacked assemblies.

|                   |                             | Enthalpy (H) in a.u. | Gibbs free energy (G) in a.u. |
|-------------------|-----------------------------|----------------------|-------------------------------|
| <i>ortho-</i>     | <b>3a</b>                   | -901.58653993        | -901.64305816                 |
|                   | <b>3a'</b>                  | -901.57927334        | -901.63565126                 |
|                   | <b>3a-H</b>                 | -1803.20091045       | -1803.29136008                |
|                   | <b>3a'-H</b>                | -1803.19036891       | 1803.28096781                 |
|                   | <b>3a-<math>\pi</math></b>  | -1803.19186609       | -1803.28275213                |
|                   | <b>3a'-<math>\pi</math></b> | -1803.17835901       | -1803.26717376                |
| <i>meta-</i>      | <b>3b</b>                   | -901.58452214        | -901.64096528                 |
|                   | <b>3b'</b>                  | -901.58480227        | -901.64123325                 |
|                   | <b>3b-H</b>                 | -1803.19934994       | -1803.28705385                |
|                   | <b>3b'-H</b>                | -1803.19653424       | -1803.28326435                |
|                   | <b>3b-<math>\pi</math></b>  | -1803.19259370       | -1803.28276822                |
|                   | <b>3b'-<math>\pi</math></b> | -1803.19370741       | -1803.28349267                |
| <i>para-</i>      | <b>3c</b>                   | -901.58315667        | -901.63961724                 |
|                   | <b>3c-H</b>                 | -1803.19578777       | -1803.28604414                |
|                   | <b>3c-<math>\pi</math></b>  | -1803.19356766       | -1803.28273182                |
| <i>ortho-meta</i> | <b>3d</b>                   | -1000.71519480       | -1000.77363184                |
|                   | <b>3d'</b>                  | -1000.70833470       | -1000.76658582                |
|                   | <b>3d-H</b>                 | -2001.45789663       | -2001.55207092                |
|                   | <b>3d-H<sub>a</sub></b>     | -2001.45242476       | -2001.54355446                |
|                   | <b>3d'-H</b>                | -2001.44182342       | -2001.53583063                |
|                   | <b>3d-<math>\pi</math></b>  | -2001.46124946       | -2001.55412606                |
|                   | <b>3d'-<math>\pi</math></b> | -2001.44046567       | -2001.53417341                |
| <i>meta-para</i>  | <b>3e</b>                   | -1000.71763640       | -1000.77595401                |
|                   | <b>3e'</b>                  | -1000.71784118       | -1000.77613028                |
|                   | <b>3e-H</b>                 | -2001.46551465       | -2001.55849306                |
|                   | <b>3e'-H</b>                | -2001.46592756       | -2001.55930662                |
|                   | <b>3e-<math>\pi</math></b>  | -2001.46199979       | -2001.55520075                |
|                   | <b>3e'-<math>\pi</math></b> | -2001.46304869       | -2001.55423219                |
| Without F         | <b>1</b>                    | -802.45392068        | -802.50832573                 |
|                   | <b>1-H</b>                  | -1604.93444588       | -1605.02108363                |

**Table S39** DFT-calculated chemical properties of **3a-e**.

| <b>Compound</b> | <b>HOMO<br/>(eV) (-I)</b> | <b>LUMO<br/>(eV) (-A)</b> | <b>Energy<br/>gap (eV)</b> | <b>Electronegativity<br/>[(I+A)/2] (eV)</b> | <b>Dipole<br/>moment<br/>(Debye)</b> | <b>Hardness (<math>\eta</math>)<br/>(eV) [(I-<br/>A)/2]</b> | <b>Softness<br/>(<math>S = 1/\eta</math>)<br/>(eV)</b> |
|-----------------|---------------------------|---------------------------|----------------------------|---------------------------------------------|--------------------------------------|-------------------------------------------------------------|--------------------------------------------------------|
| <b>3a</b>       | -6.76                     | -0.55                     | 6.21                       | 3.65                                        | 2.46                                 | 3.10                                                        | 0.32                                                   |
| <b>3a'</b>      | -6.34                     | -0.28                     | 6.06                       | 3.31                                        | 2.26                                 | 3.03                                                        | 0.33                                                   |
| <b>3b</b>       | -6.46                     | -0.37                     | 6.09                       | 3.41                                        | 3.98                                 | 3.05                                                        | 0.33                                                   |
| <b>3b'</b>      | -6.40                     | -0.33                     | 6.07                       | 3.36                                        | 3.08                                 | 3.04                                                        | 0.33                                                   |
| <b>3c</b>       | -6.33                     | -0.54                     | 5.79                       | 3.43                                        | 3.46                                 | 2.89                                                        | 0.34                                                   |
| <b>3d</b>       | -6.79                     | -0.48                     | 6.31                       | 3.63                                        | 2.50                                 | 3.15                                                        | 0.31                                                   |
| <b>3d'</b>      | -6.54                     | -0.28                     | 6.26                       | 3.41                                        | 1.97                                 | 3.13                                                        | 0.32                                                   |
| <b>3e</b>       | -6.45                     | -0.65                     | 5.80                       | 3.55                                        | 2.79                                 | 2.90                                                        | 0.34                                                   |
| <b>3e'</b>      | -6.43                     | -0.63                     | 5.80                       | 3.54                                        | 2.88                                 | 2.90                                                        | 0.34                                                   |

## 5. NMR Spectra

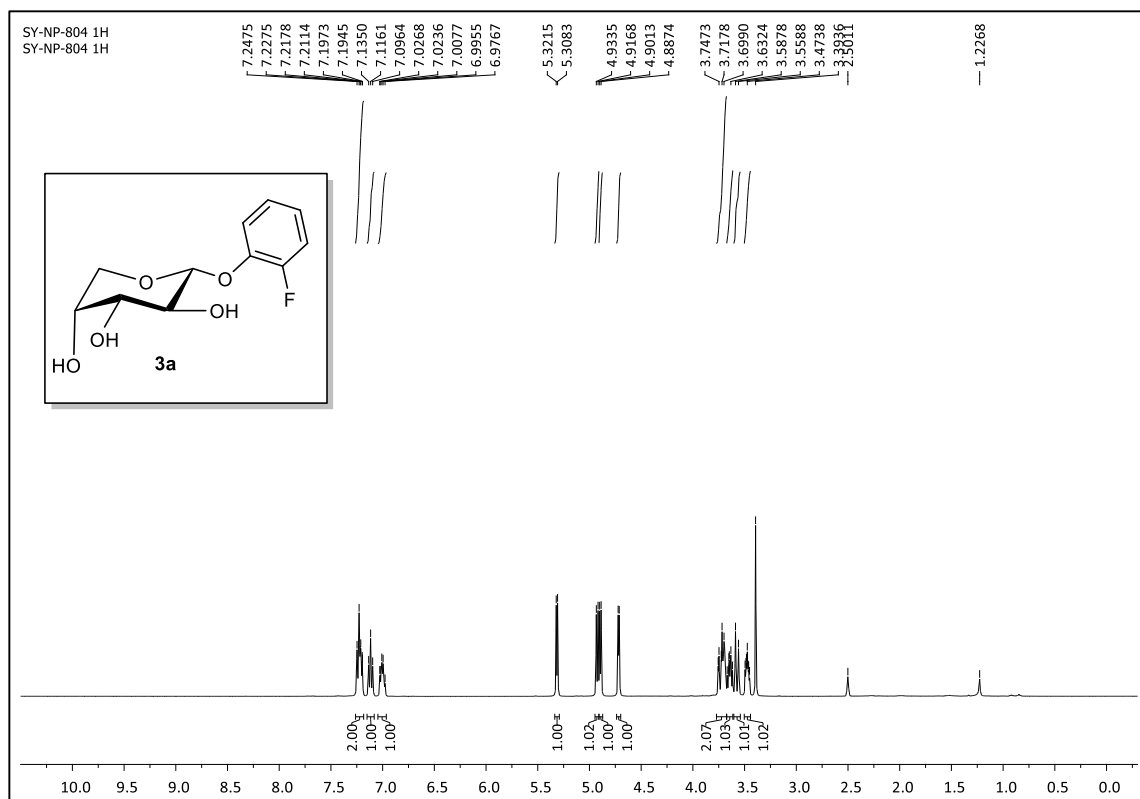

Fig. S41  $^1\text{H-NMR}$  (400 MHz, DMSO- $d_6$ ) spectrum of **3a**.

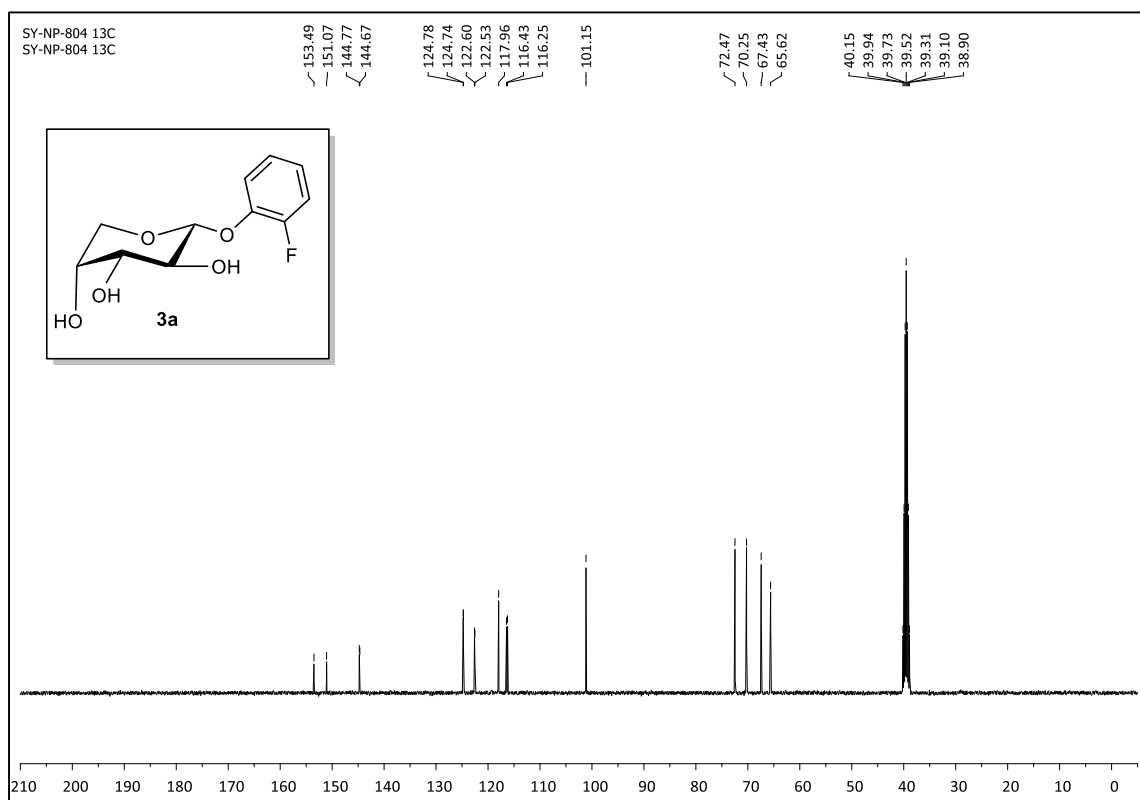

Fig. S42  $^{13}\text{C}\{^1\text{H}\}$  NMR (100 MHz, DMSO- $d_6$ ) spectrum of **3a**.

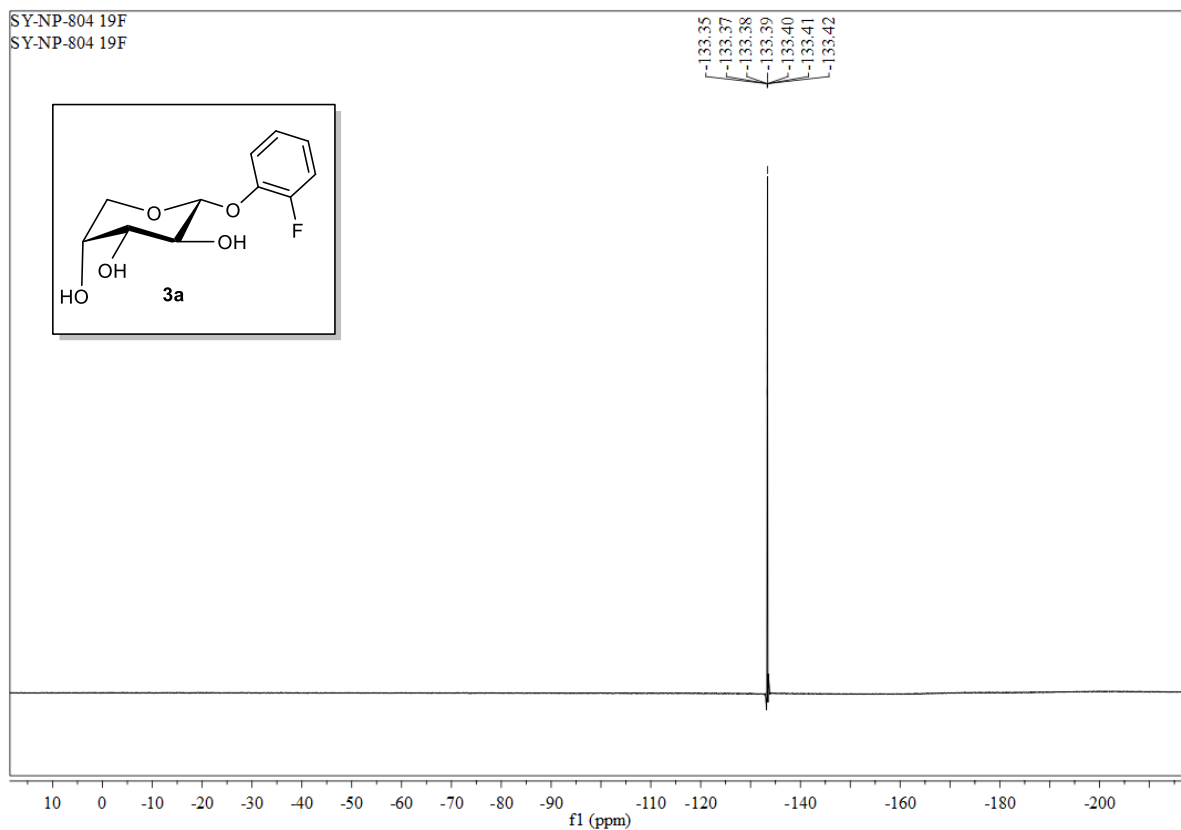

Fig. S43  $^{19}\text{F}$  NMR (377 MHz, DMSO-d<sub>6</sub>) spectrum of **3a**

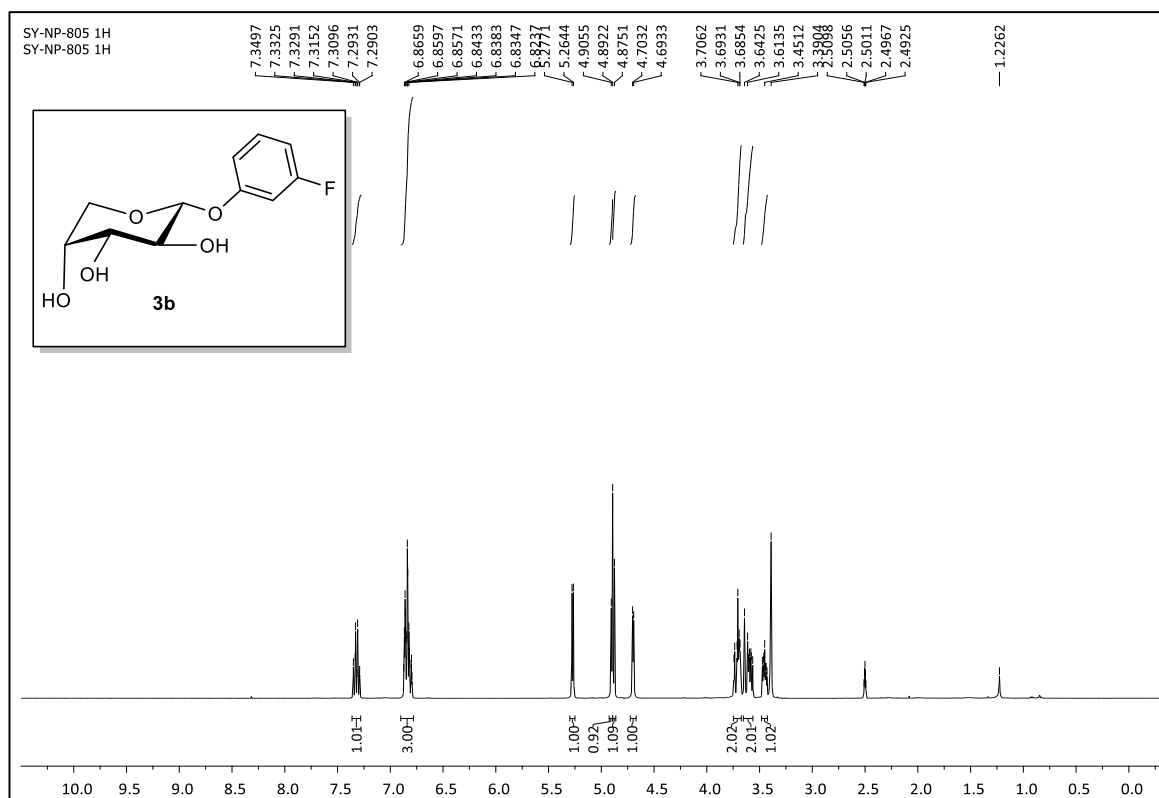

Fig. S44  $^1\text{H}$ -NMR (400 MHz, DMSO-d<sub>6</sub>) spectrum of **3b**.

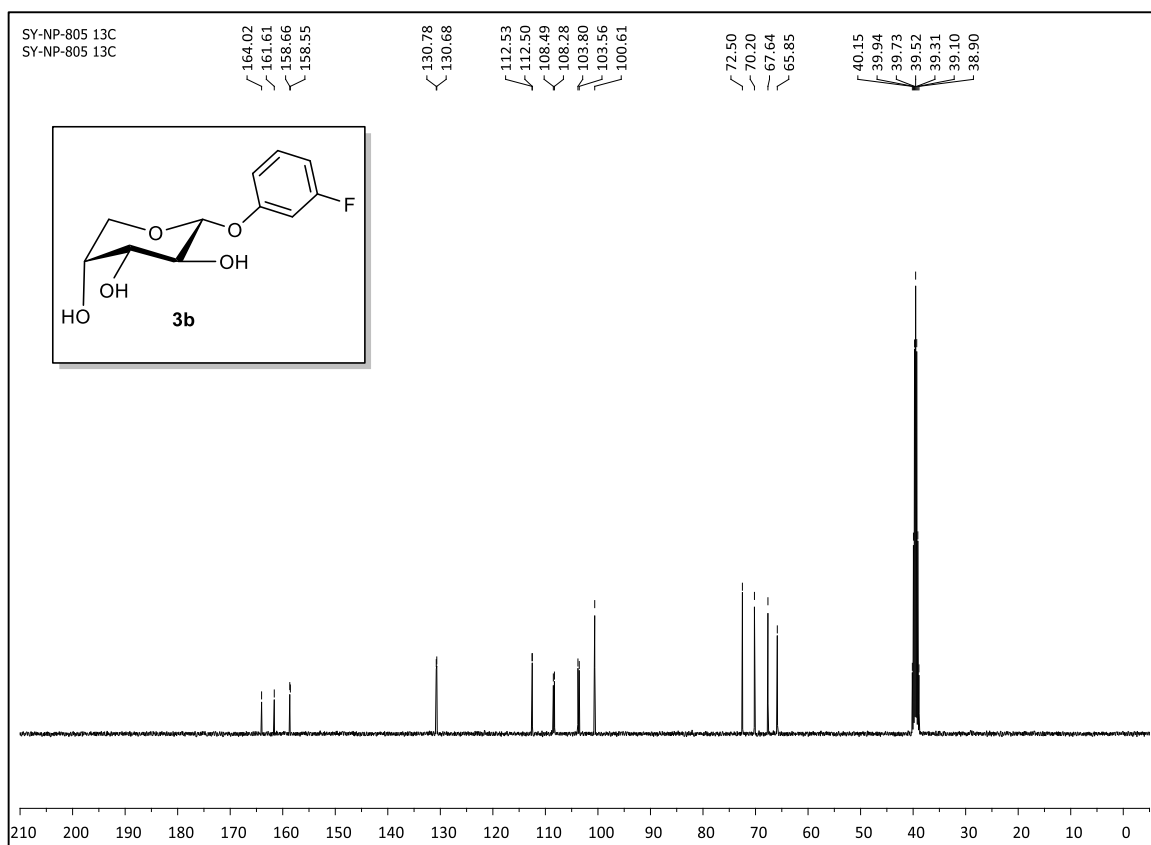

**Fig. S45**  $^{13}\text{C}\{^1\text{H}\}$  NMR (100 MHz, DMSO- $d_6$ ) spectrum of **3b**.

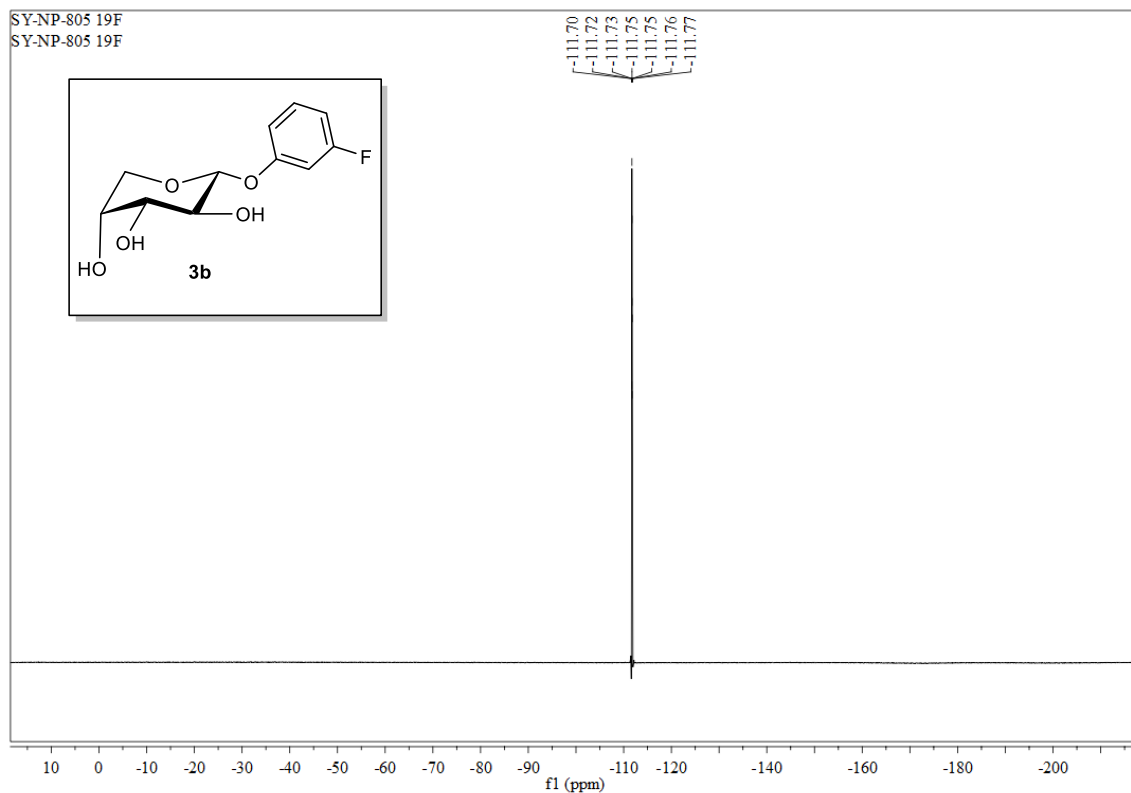

**Fig. S46**  $^{19}\text{F}$  NMR (377MHz, DMSO- $d_6$ ) spectrum of **3b**

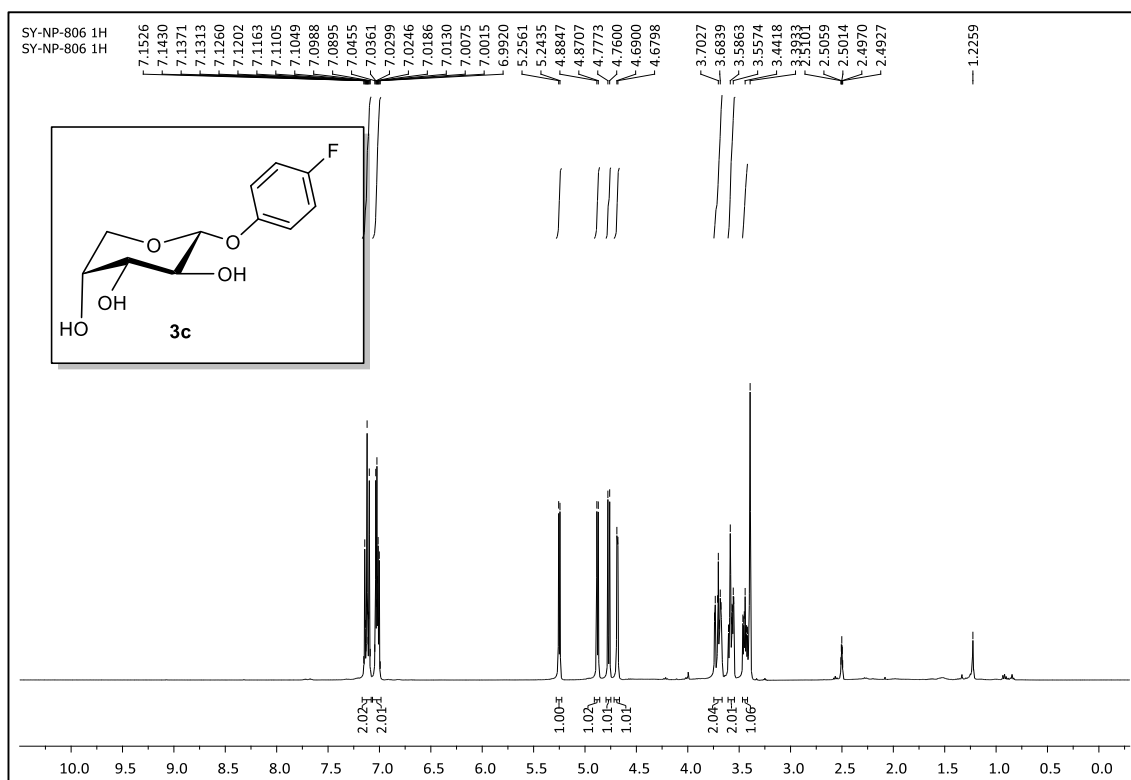

Fig. S47  $^1\text{H-NMR}$  (400 MHz,  $\text{DMSO-d}_6$ ) spectrum of **3c**

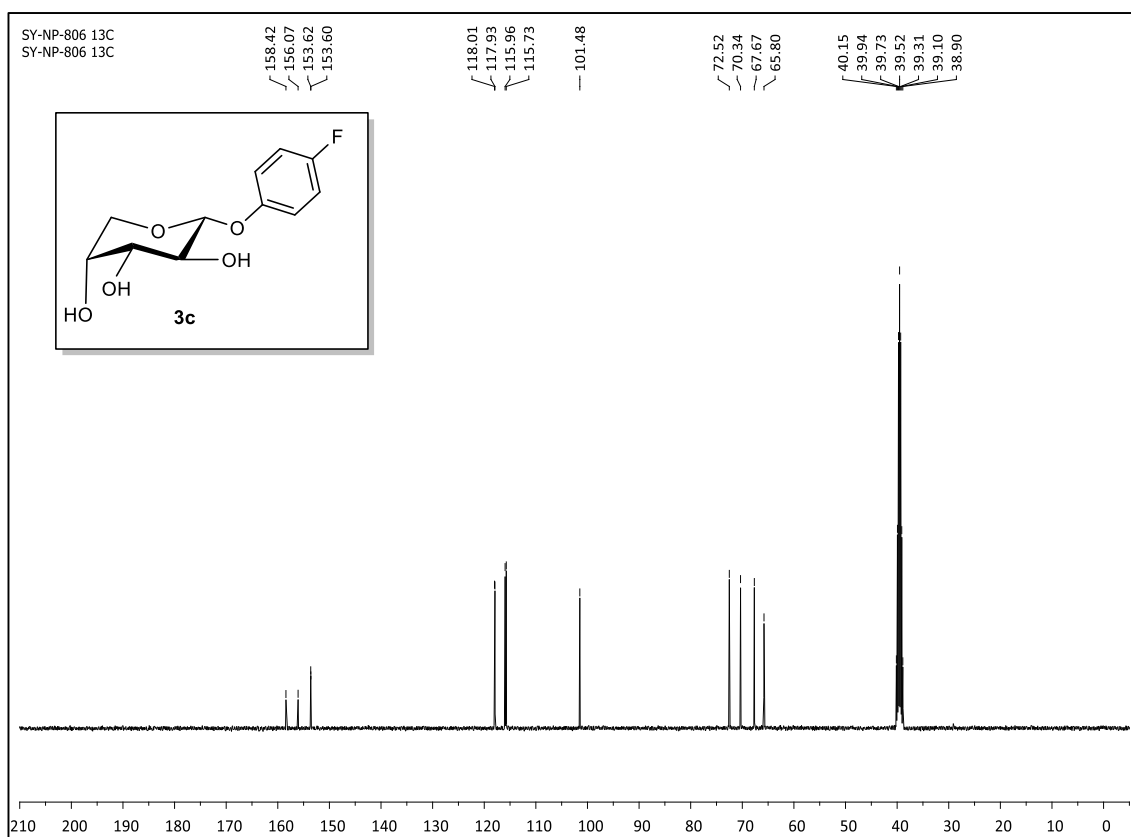

Fig. S48  $^{13}\text{C}\{^1\text{H}\}$  NMR (100 MHz,  $\text{DMSO-d}_6$ ) spectrum of **3c**.



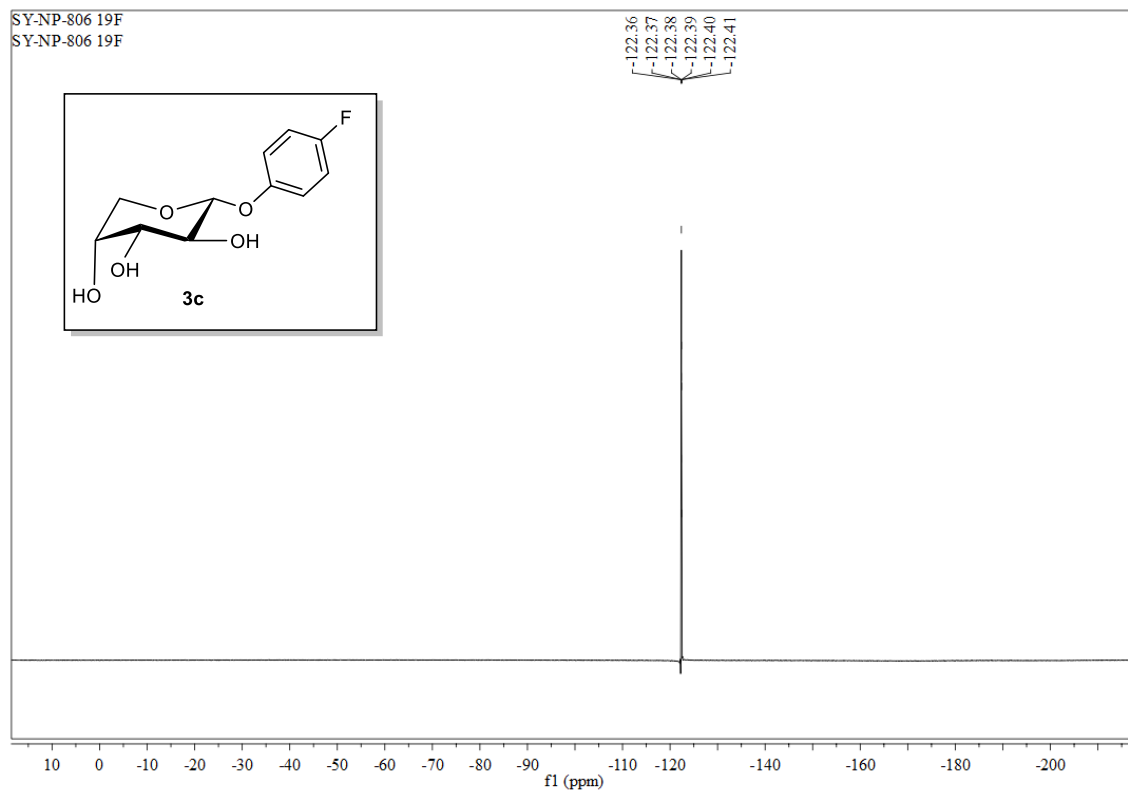

**Fig. S49**  $^{19}\text{F}$  NMR (377 MHz, DMSO- $d_6$ ) spectrum of **3c**

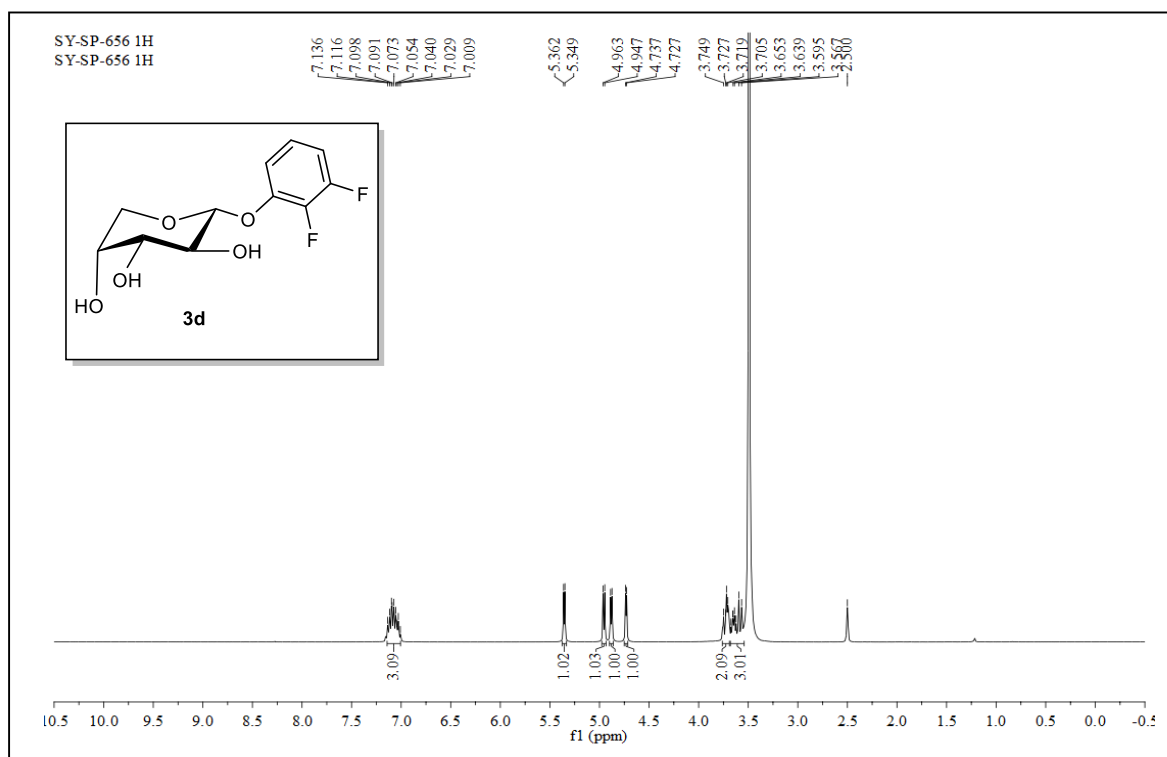

**Fig. S50**  $^1\text{H}$ -NMR (400 MHz, DMSO- $d_6$ ) spectrum of **3d**

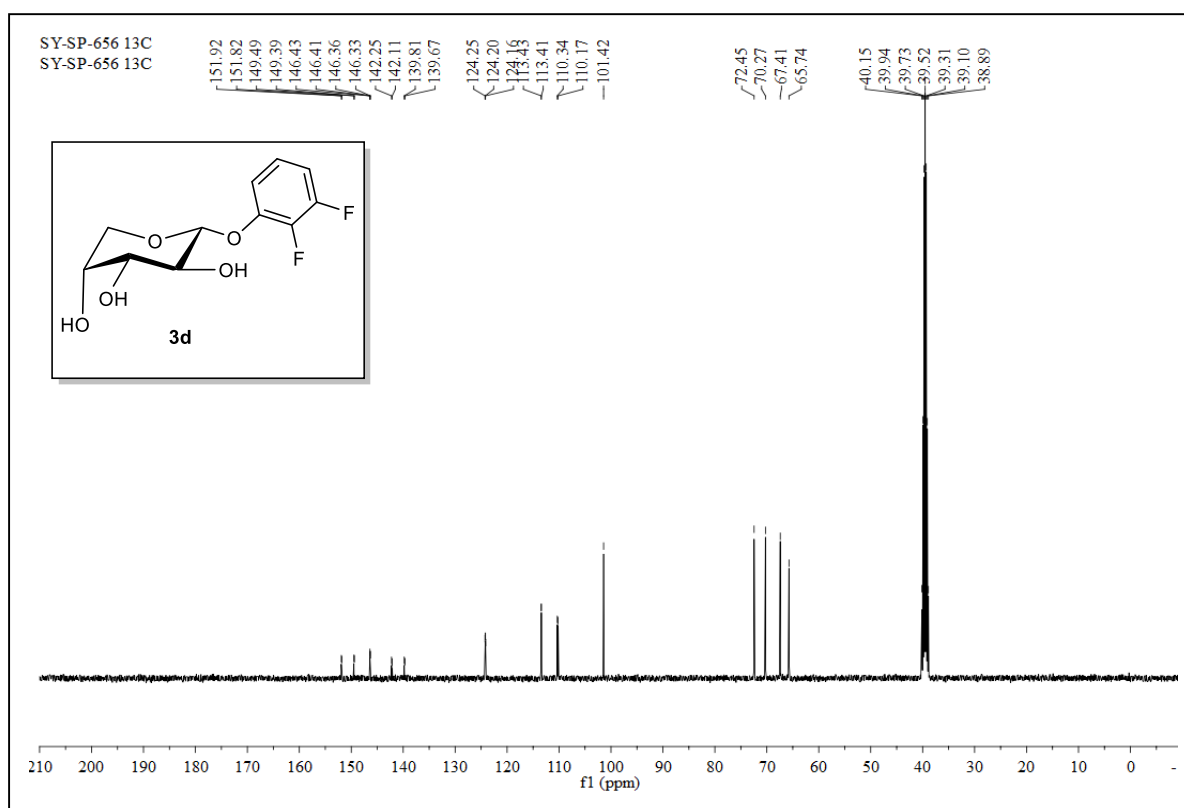

**Fig. S51**  $^{13}\text{C}\{^1\text{H}\}$  NMR (100 MHz, DMSO- $d_6$ ) spectrum of **3d**

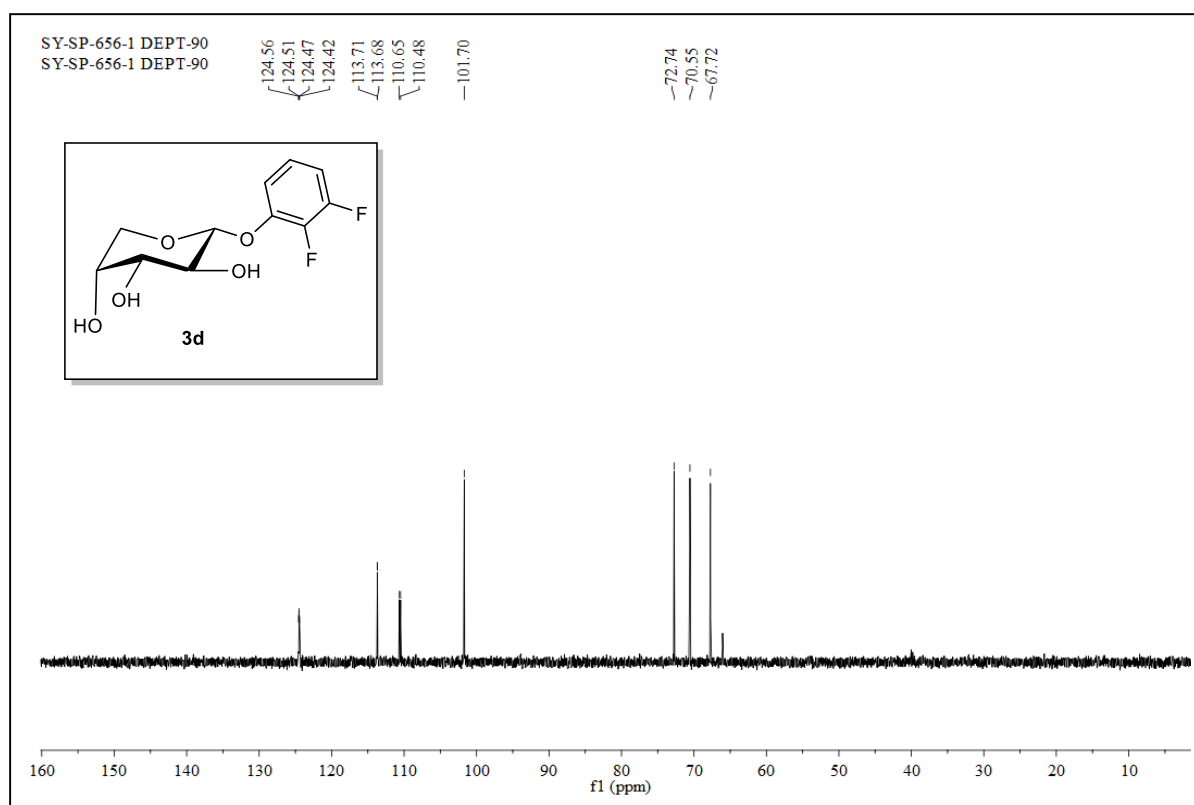

**Fig. S52** DEPT 90 NMR (100 MHz, DMSO- $d_6$ ) spectrum of **3d**

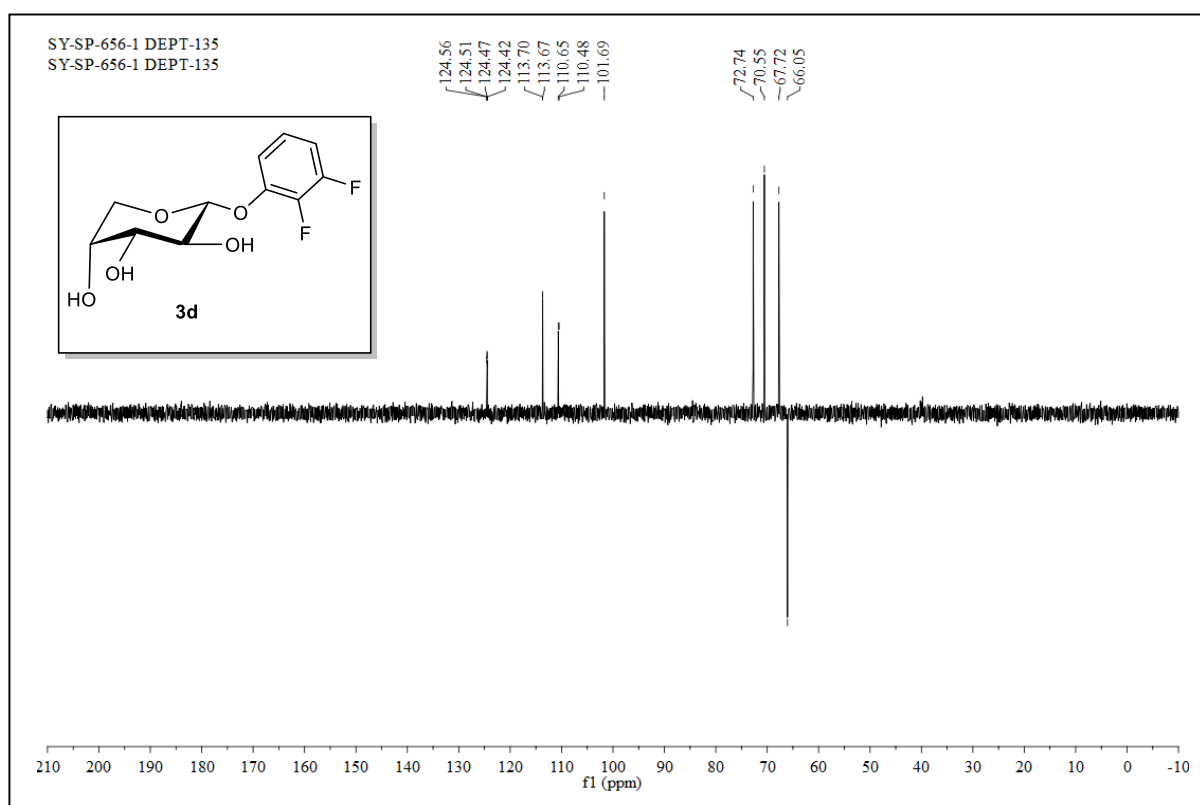

**Fig. S53** DEPT 135 NMR (100 MHz, DMSO-d<sub>6</sub>) spectrum of **3d**

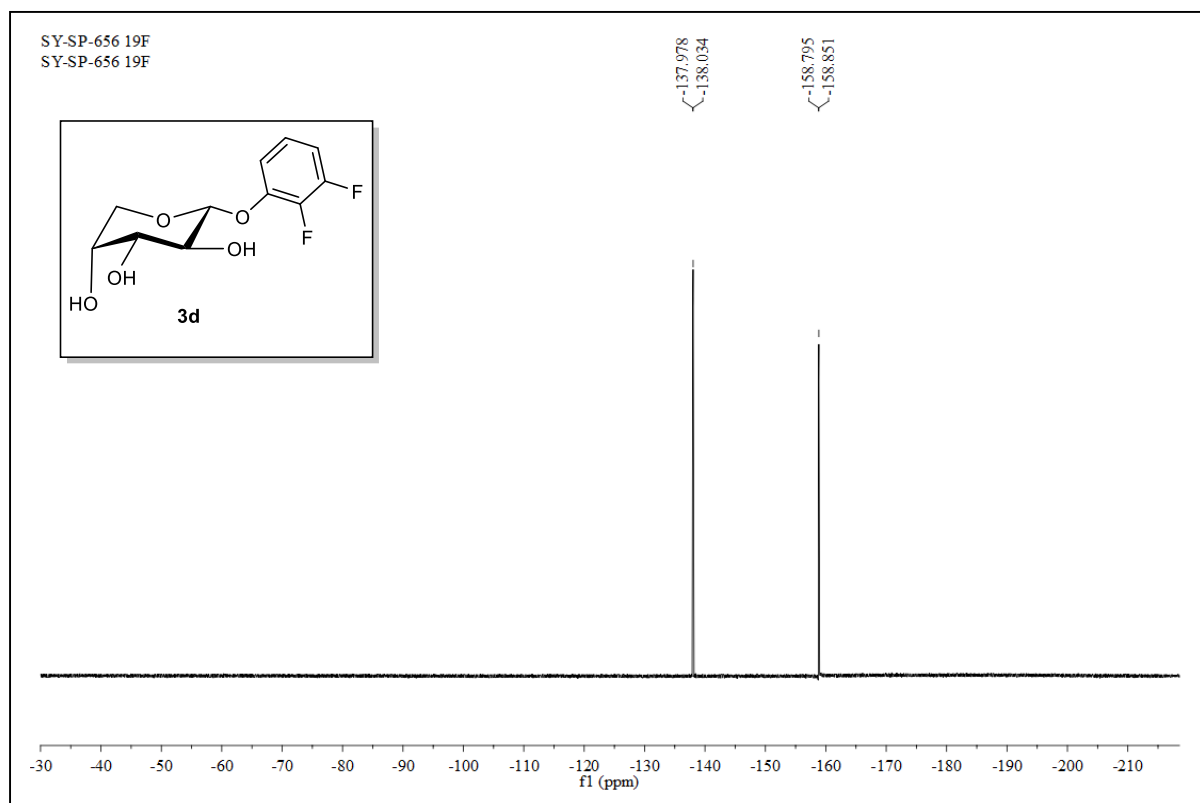

**Fig. S54** <sup>19</sup>F NMR (377 MHz, DMSO-d<sub>6</sub>) spectrum of **3d**

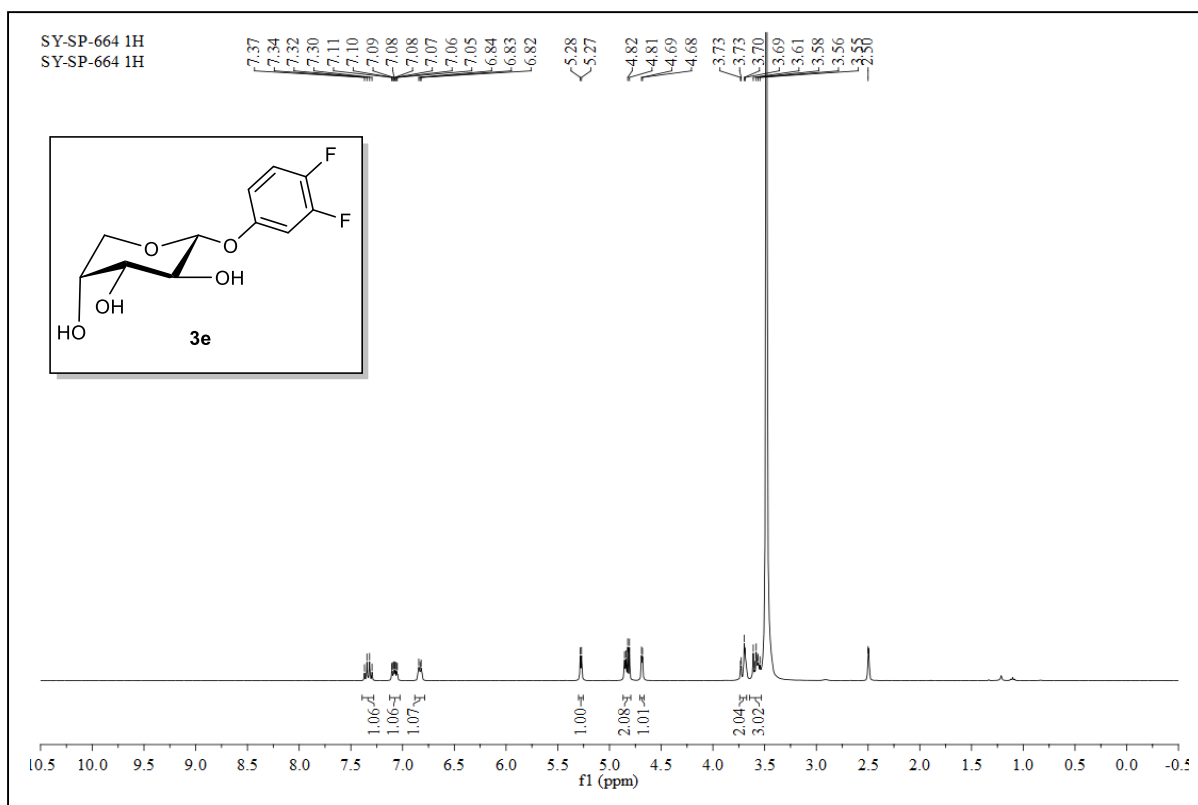

**Fig. S55**  $^1\text{H-NMR}$  (400 MHz, DMSO- $d_6$ ) spectrum of **3e**

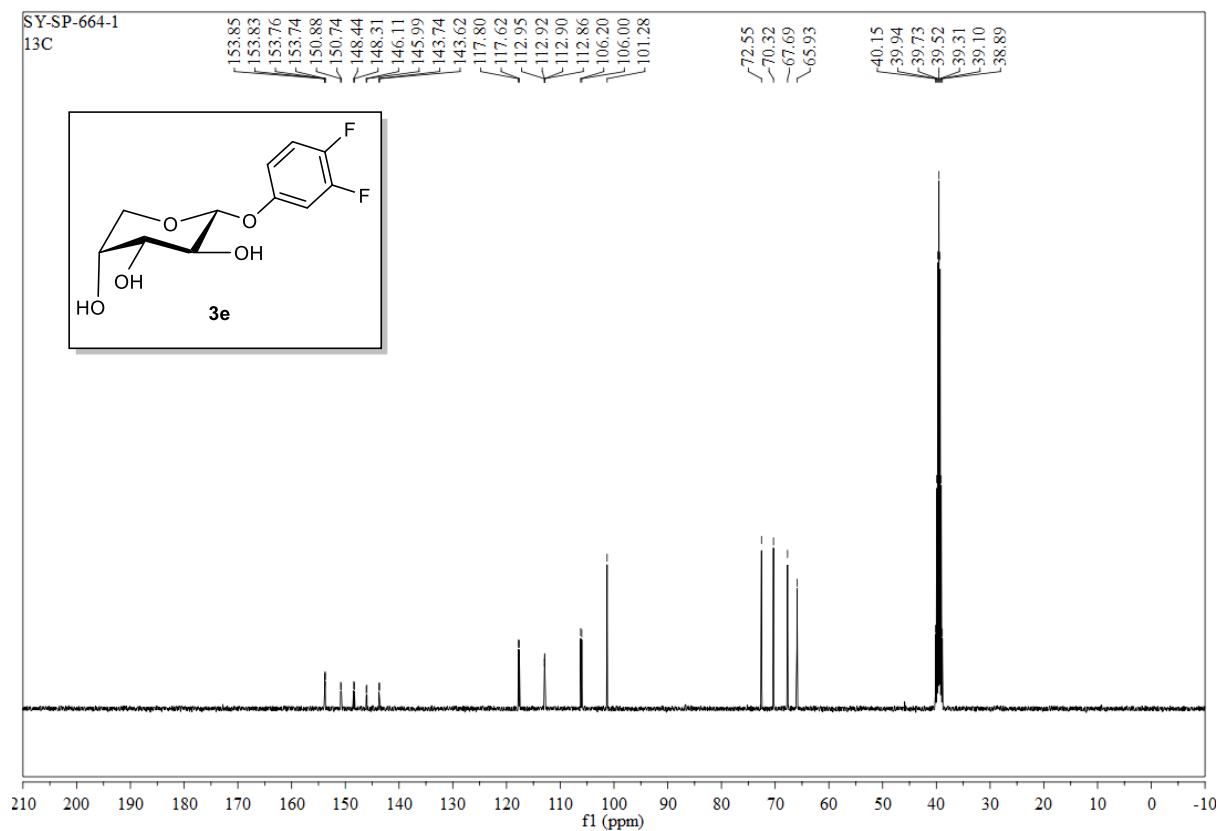

**Fig. S56**  $^{13}\text{C}\{^1\text{H}\}$  NMR (100 MHz, DMSO- $d_6$ ) spectrum of **3e**

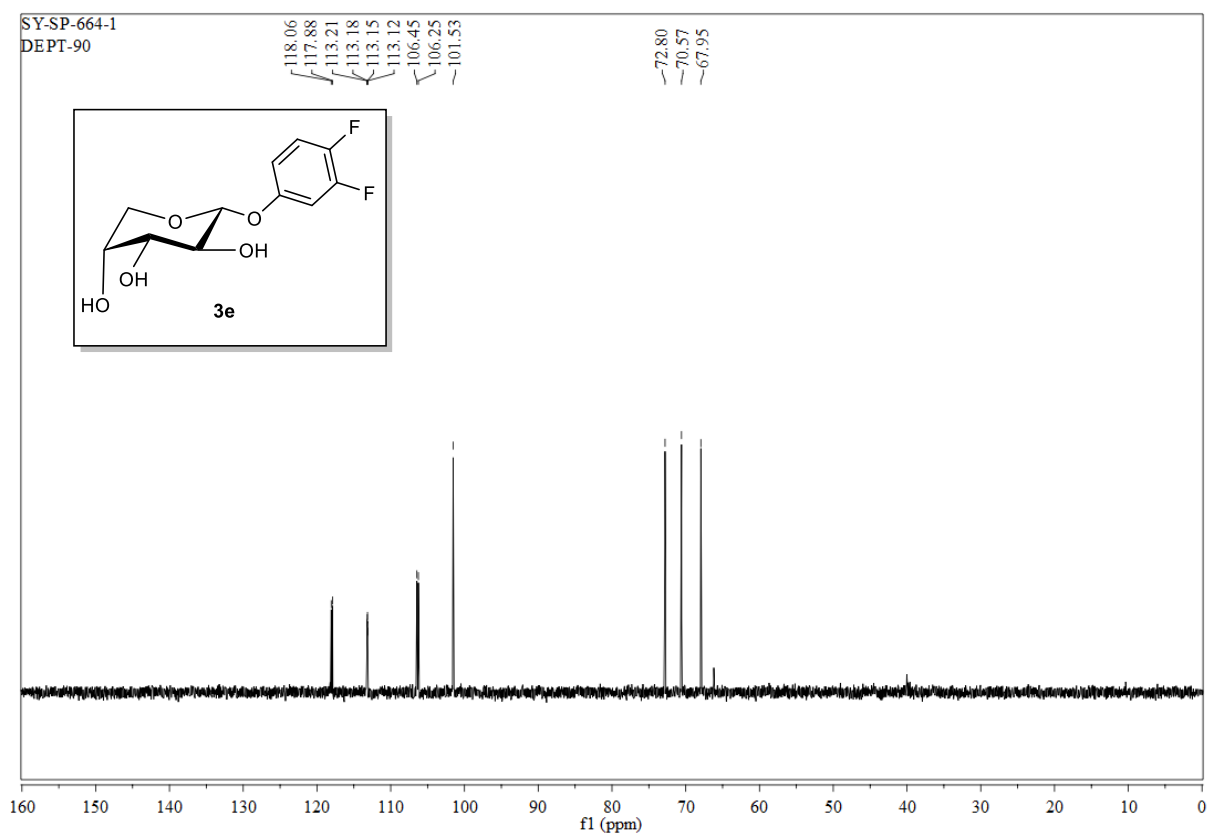

Fig. S57 DEPT 90 NMR (100 MHz, DMSO-d6) spectrum of **3e**

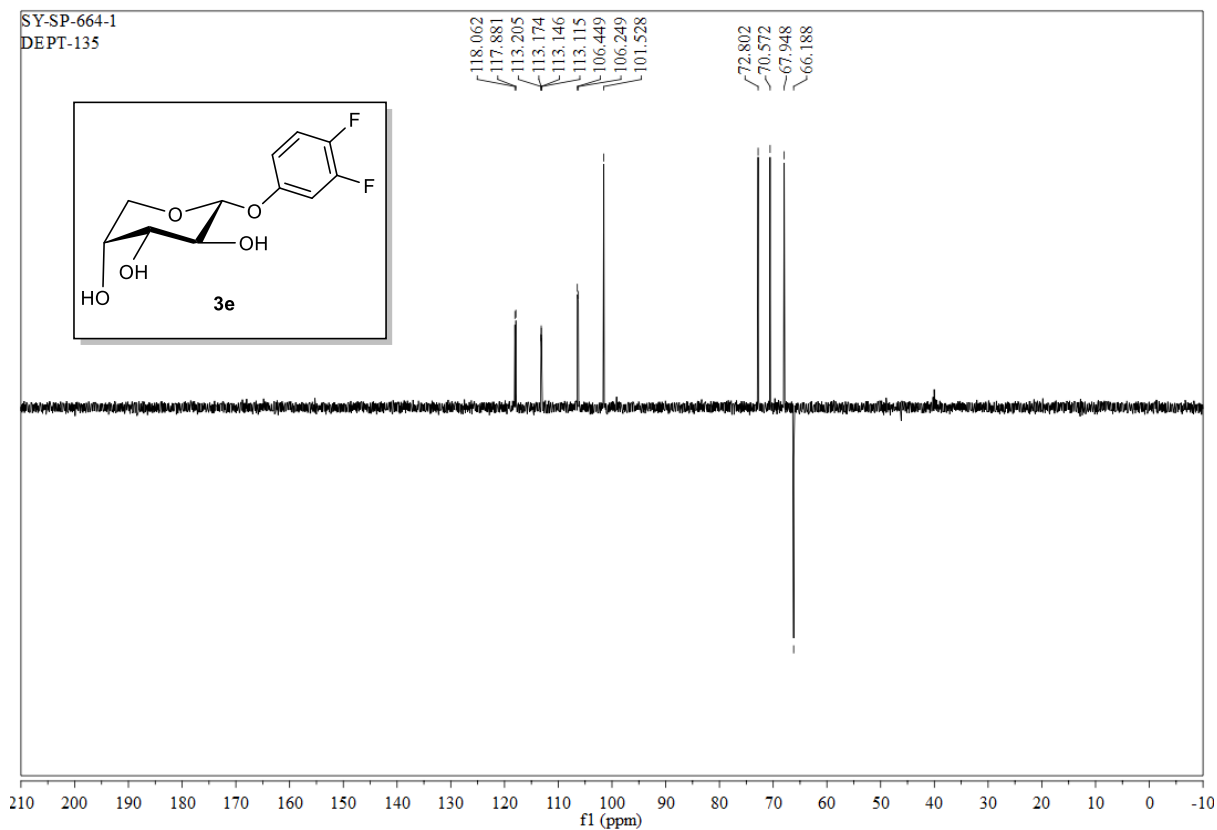

Fig. S58 DEPT 135 NMR (100 MHz, DMSO-d6) spectrum of **3e**

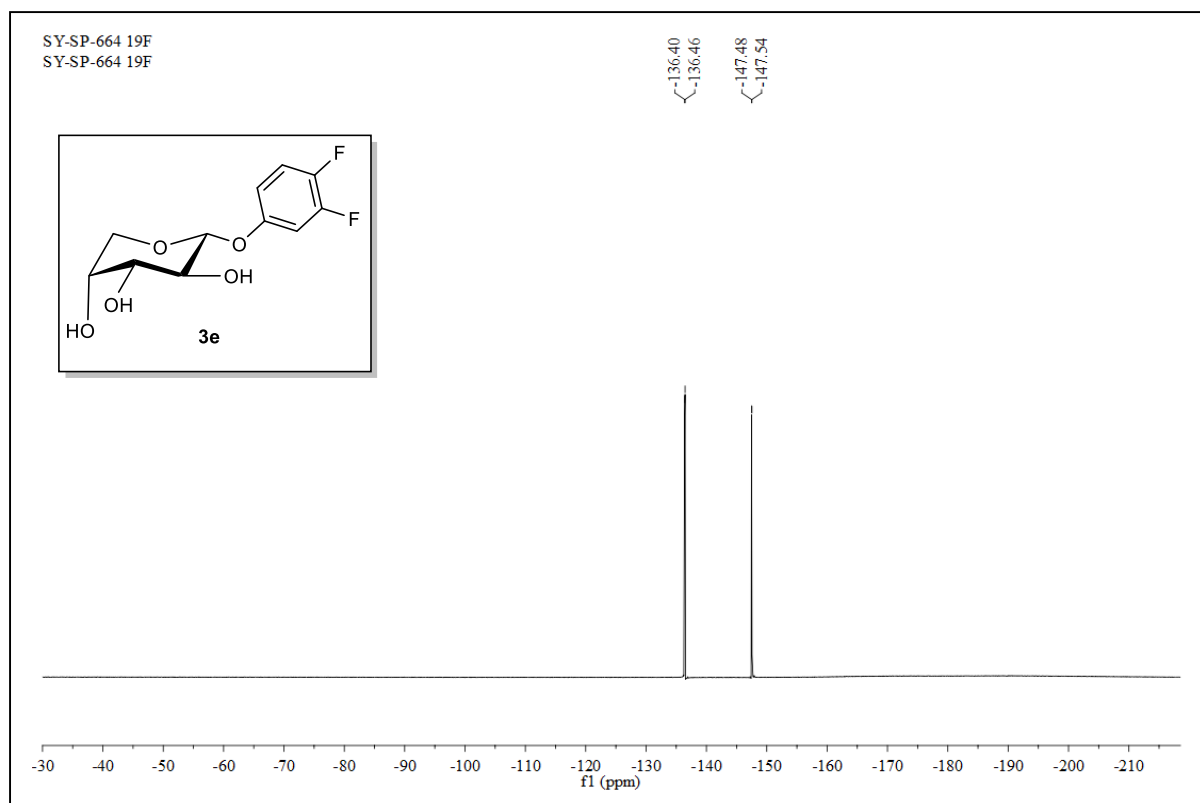

**Fig. S59**  $^{19}\text{F}$ -NMR (377 MHz, DMSO-d<sub>6</sub>) spectrum of **3e**

**Table S40** Summary of NMR data for compounds **3a-3e**.

| Sl. No. | Compound  | Anomeric proton (H1)<br>$\delta$ (ppm) | Aromatic protons                                                           | Anomeric carbon (C1)<br>$\delta$ (ppm) |
|---------|-----------|----------------------------------------|----------------------------------------------------------------------------|----------------------------------------|
| 1       | <b>3a</b> | 4.93 (d, $J = 6.7$ Hz, 1H)             | 7.25–6.98 (m, 4H)                                                          | 101.2                                  |
| 2       | <b>3b</b> | 4.88 (d, $J = 6.8$ Hz, 1H)             | 7.35–6.79 (m, 4H)                                                          | 100.6                                  |
| 3       | <b>3c</b> | 4.77 (d, $J = 6.9$ Hz, 1H)             | 7.15–6.99 (m, 4H)                                                          | 101.5                                  |
| 4       | <b>3d</b> | 4.96 (d, $J = 6.4$ Hz, 1H)             | 7.14–7.01 (m, 3H)                                                          | 101.4                                  |
| 5       | <b>3e</b> | 4.86-4.81(m, 2H)                       | 7.33 (dd, $J = 19.6$ and 9.2 Hz, 1H), 7.11-7.05 (m, 1H), 6.84-6.82 (m, 1H) | 101.3                                  |
